# Supplementary material for: Density functional theory study of crown ether–magnesium complexes: from a solvated ion to an ion trap
Source: Royal Society of Chemistry journal article supplement (doi:10.1039/d3cp03991a), 2023-01-01
Supplement: d3cp03991a1.pdf [file d3cp03991a1.pdf]

# Density functional theory study of crown ether–magnesium complexes: from a solvated ion to an ion trap

Katarina Čeranić<sup>a,b</sup>, Branislav Milovanović<sup>b</sup> and Milena Petković<sup>b\*</sup>

<sup>a</sup>Innovation Center of the Faculty of Chemistry, Studentski trg 12-16, 11158 Belgrade, Serbia

<sup>b</sup>University of Belgrade – Faculty of Physical Chemistry, Studentski trg 12-16, 11158 Belgrade, Serbia

Figure S1–S29: Crown **1–29** conformers optimized at M06-2X/6-31+G(d,p) level. (pages S2-S38)

Figure S30: Structures of magnesium–crown complexes optimized at 6-311+G(d,p) level. (page S39)

Figure S31: Structure of the magnesium ion coordinated with six water molecules optimized at 6-311+G(d,p) level. (page S40)

Figure S32: Structures of magnesium–crown complexes with the magnesium ion coordinated with two water molecules optimized at M06-2X/6-311+G(d,p) level. (page S41)

Figure S33: Time evolution of the dihedral angle  $d_{O_s}$  formed by the four oxygen atoms in complexes of  $Mg^{2+}$  with crowns **2-8**. (page S42)

Figure S34: Structures of dihydrated complexes of  $Na^+$  (the first and the second column),  $K^+$  (the third and the fourth column), and  $Ca^{2+}$  (the fifth and the sixth column) with crowns **3, 4**, and **7** optimized at M06-2X/6-311+G(d,p) level. (page S42)

Table S1–S29: Relative energy  $E$  (in kcal/mol) of crown **1–29** conformers computed at the M06-2X/6-31+G(d,p) level. (pages S2-S38)

Table S30: Changes in average Mg–O distances induced by the solvent,  $\Delta\bar{r}_r(Mg-O)$ ; changes in Mg distances from the plane defined by crown's oxygen atoms,  $\Delta r_{plane}^{no}$ . All distances are presented in Å.  $\Delta E_{cl}^{CMg}$ ,  $\Delta E_{xc}^{CMg}$ , and  $\Delta E_{int}^{CMg}$  stand for the changes in classical, non-classical, and the overall crown–magnesium interaction energy caused by the presence of explicit solvent molecules. All energy components are presented in kcal/mol. Thin horizontal lines are used to emphasize that crowns **1-8**, **9-26**, and **27-29** contain 4, 5, and 6 oxygen atoms, respectively. (page S40)

Table S31: Average IQA energy components (in kcal/mol) for Mg–solvent (MgS) and crown–solvent (CS) interaction: solvent deformation energy  $\bar{E}_{def}^S$ , solvent promotion energy  $\bar{E}_{pro}^S$ , as well as classical  $\bar{E}_{cl}^{MgS}/\bar{E}_{cl}^{CS}$ , non-classical  $\bar{E}_{xc}^{MgS}/\bar{E}_{xc}^{CS}$ , and overall  $\bar{E}_{int}^{MgS}/\bar{E}_{int}^{CS}$  ion–solvent/crown–solvent interaction energy, absolute value of the difference in solvents' promotion energies  $\Delta E_{pro}^S$ , absolute value of the difference in classical  $\Delta E_{cl}^{MgS}/\Delta E_{cl}^{CS}$ , non-classical  $\Delta E_{xc}^{MgS}/\Delta E_{xc}^{CS}$ , and overall  $\Delta E_{int}^{MgS}/\Delta E_{int}^{CS}$  ion–solvent/crown–solvent interaction energy. (page S43)

Table S32: Distance of the metal ion from the center of mass defined by crown's oxygen atoms  $r(M-COM)$  ( $M = Mg, Na, K, Ca$ ) in the optimized hydrated complexes  $[CM(H_2O)_2]^{n+}$  ( $n = 2$  for Mg and Ca;  $n = 1$  for Na, K); average ion–oxygen distances  $\bar{r}(ion-O_i)$  ( $i = 1, 2, 3, 4$ ) and the overall average ion–oxygen distance  $\bar{r}(ion-O)$ ; the number of solvent molecules  $n_S$  that coordinate the cation in the DFT-MD simulations. All distances are presented in Å. (page S43)

Table S33: Selected geometric parameters in dihydrated complexes of  $Na^+$ ,  $K^+$ , and  $Ca^{2+}$  with crowns **3, 4**, and **7** optimized at M06-2X/6-31+G(d,p) level: difference in the two ion-S bond lengths,  $\Delta r(Mg-S)$ ; ion distances from the plane defined by crown's oxygen atoms/crown's and solvent's oxygen atoms,  $r_{plane}^O / r_{plane}^{O/S}$ . (page S43)

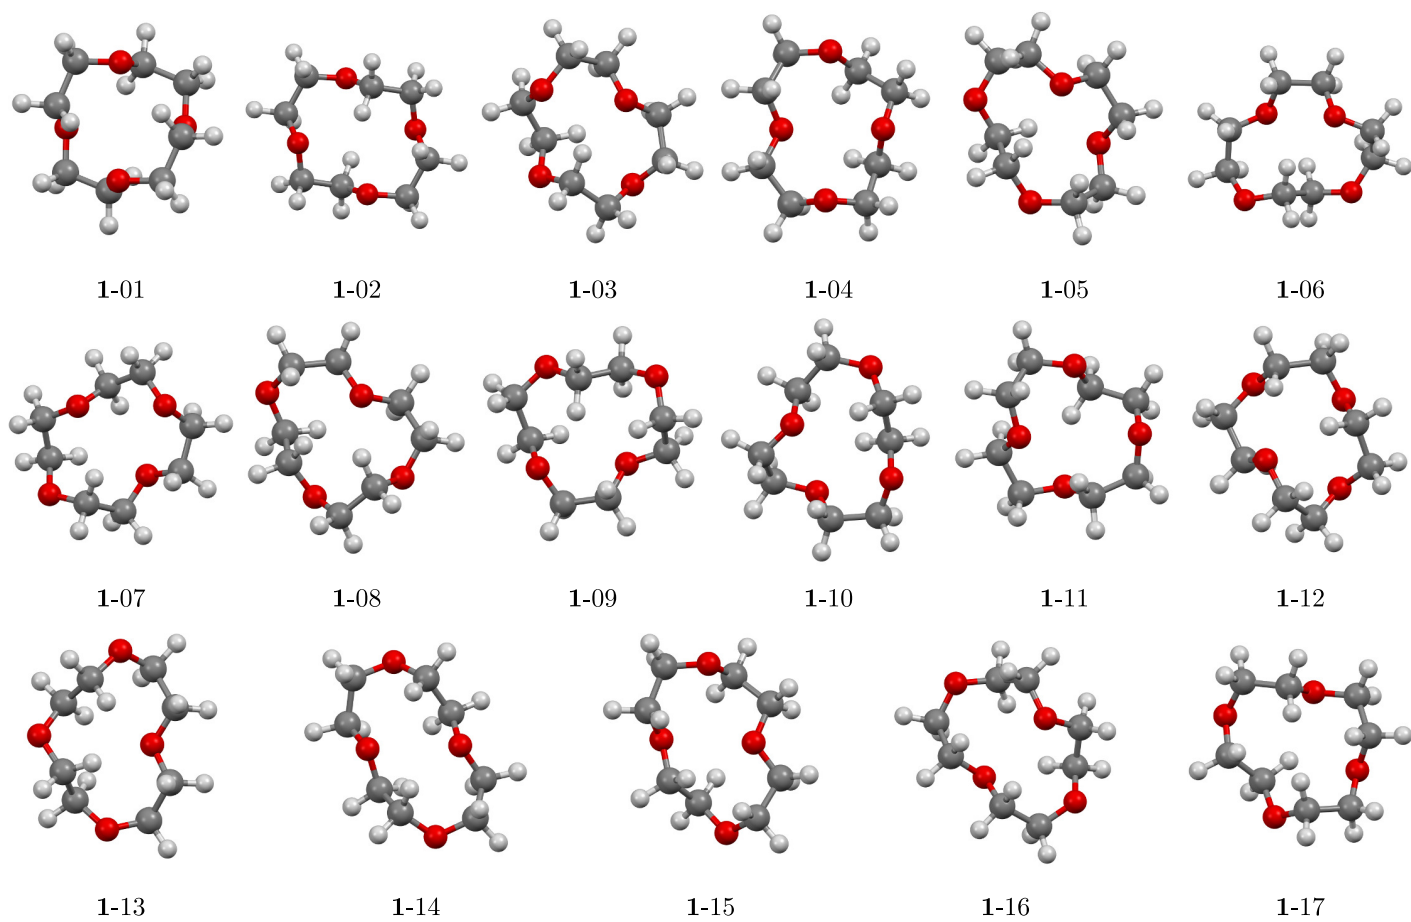

Figure S1: Crown 1 conformers optimized at M06-2X/6-31+G(d,p) level.

Table S1: Relative energy  $E$  (in kcal/mol) of crown 1 conformers computed at the M06-2X/6-31+G(d,p) level.

| Conformer | $E$ |
|-----------|-----|-----------|-----|-----------|-----|-----------|-----|-----------|-----|-----------|-----|
| 1-01      | 0.0 | 1-02      | 2.3 | 1-03      | 2.5 | 1-04      | 2.8 | 1-05      | 2.8 | 1-06      | 3.1 |
| 1-07      | 3.2 | 1-08      | 3.5 | 1-09      | 3.6 | 1-10      | 3.9 | 1-11      | 4.0 | 1-12      | 4.1 |
| 1-13      | 4.3 | 1-14      | 4.6 | 1-15      | 5.4 | 1-16      | 5.6 | 1-17      | 5.7 |           |     |

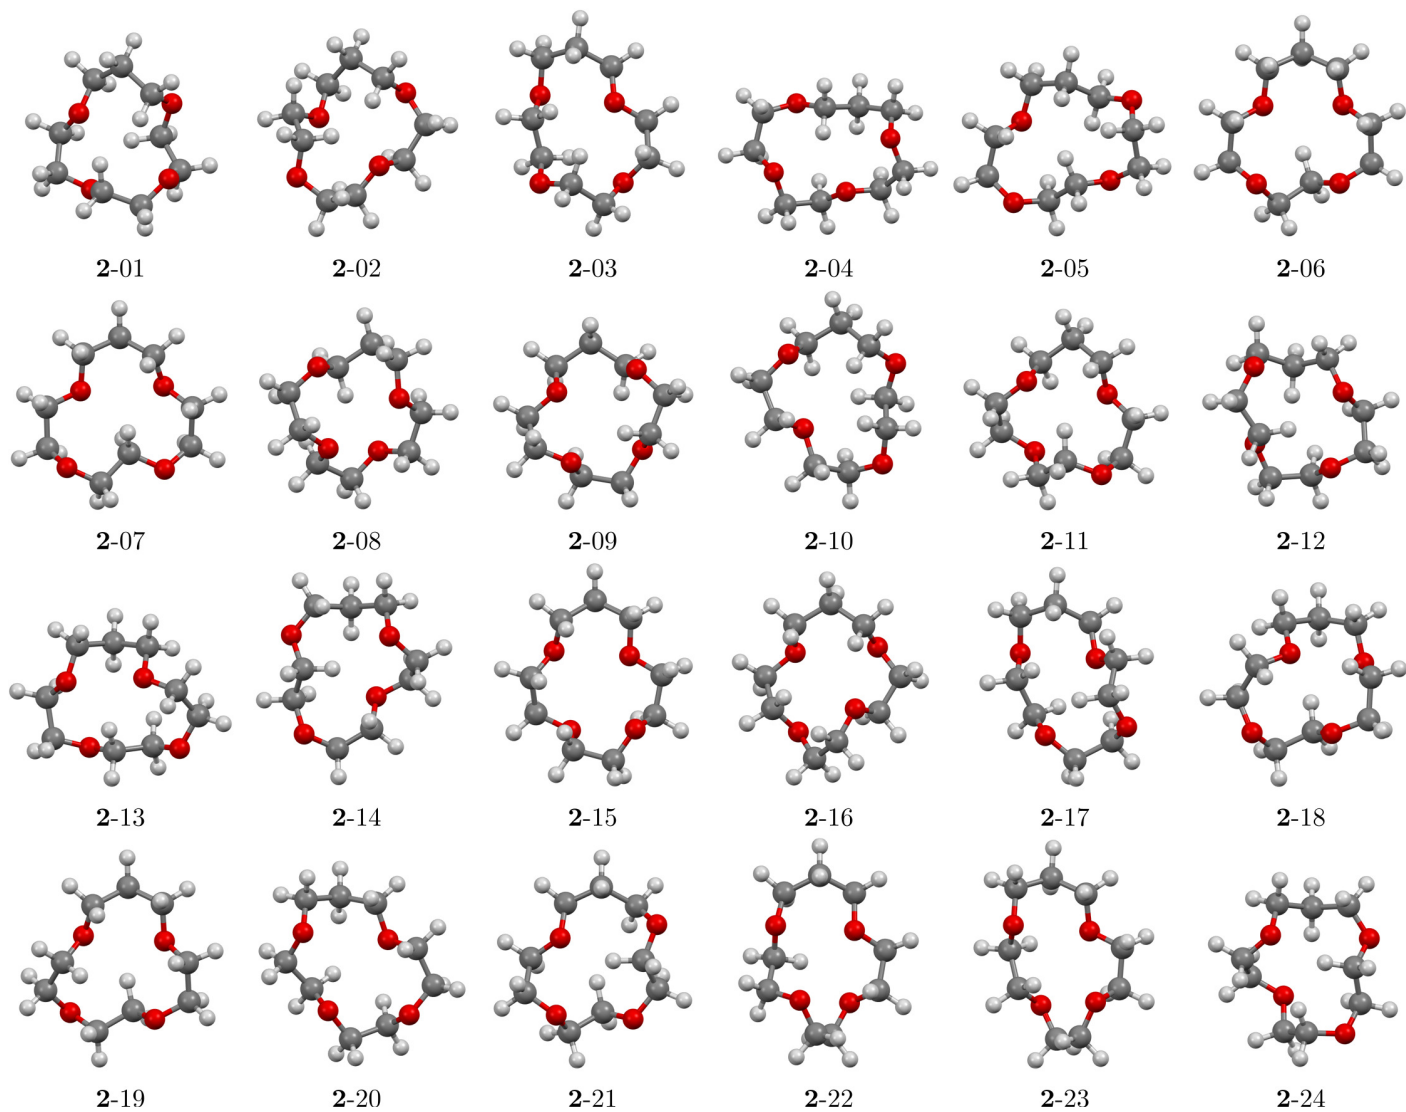

Figure S2: Crown 2 conformers optimized at M06-2X/6-31+G(d,p) level.

Table S2: Relative energy  $E$  (in kcal/mol) of crown 2 conformers computed at the M06-2X/6-31+G(d,p) level.

| Conformer | $E$ |
|-----------|-----|-----------|-----|-----------|-----|-----------|-----|-----------|-----|-----------|-----|
| 2-01      | 0.0 | 2-02      | 1.1 | 2-03      | 1.9 | 2-04      | 2.1 | 2-05      | 2.3 | 2-06      | 2.3 |
| 2-07      | 2.6 | 2-08      | 2.8 | 2-09      | 2.9 | 2-10      | 3.2 | 2-11      | 3.3 | 2-12      | 3.6 |
| 2-13      | 3.8 | 2-14      | 4.1 | 2-15      | 4.2 | 2-16      | 4.3 | 2-17      | 4.7 | 2-18      | 4.7 |
| 2-19      | 4.7 | 2-20      | 4.9 | 2-21      | 5.4 | 2-22      | 5.6 | 2-23      | 5.7 | 2-24      | 7.0 |

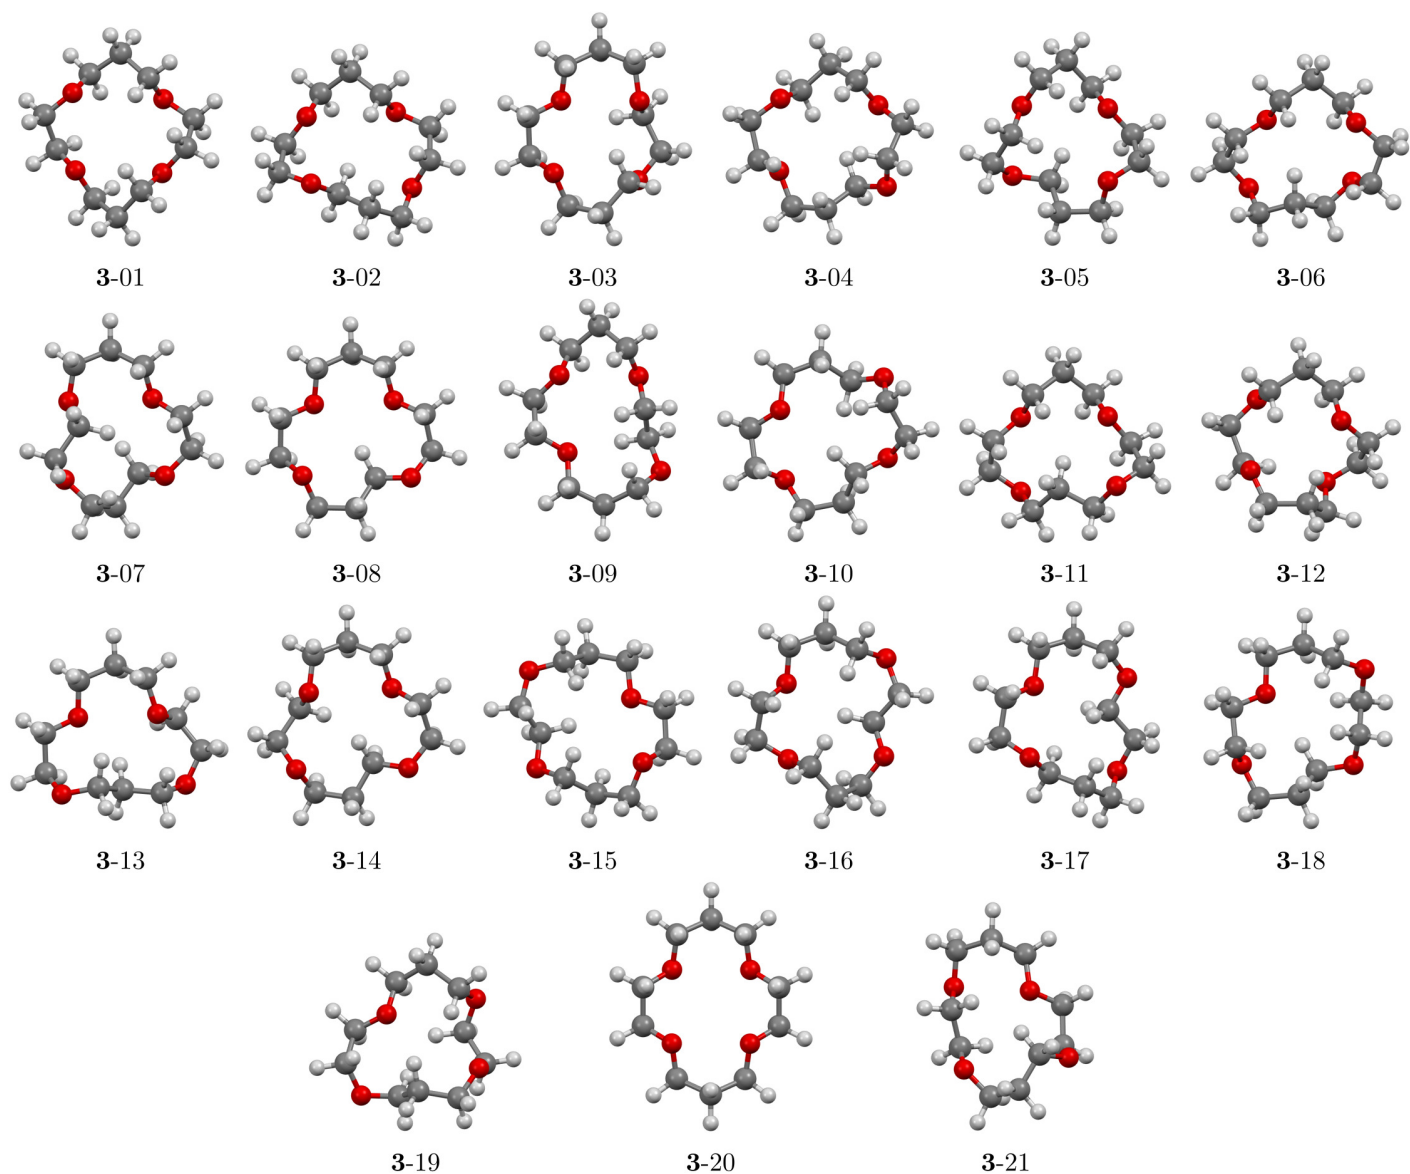

Figure S3: Crown 3 conformers optimized at M06-2X/6-31+G(d,p) level.

Table S3: Relative energy  $E$  (in kcal/mol) of crown 3 conformers computed at the M06-2X/6-31+G(d,p) level.

| Conformer | $E$ |
|-----------|-----|-----------|-----|-----------|-----|-----------|-----|-----------|-----|-----------|-----|
| 3-01      | 0.0 | 3-02      | 0.8 | 3-03      | 0.9 | 3-04      | 1.5 | 3-05      | 2.0 | 3-06      | 2.8 |
| 3-07      | 3.0 | 3-08      | 3.2 | 3-09      | 3.6 | 3-10      | 3.7 | 3-11      | 4.0 | 3-12      | 4.0 |
| 3-13      | 4.4 | 3-14      | 4.5 | 3-15      | 4.6 | 3-16      | 4.8 | 3-17      | 5.1 | 3-18      | 5.2 |
| 3-19      | 5.5 | 3-20      | 6.4 | 3-21      | 6.5 |           |     |           |     |           |     |



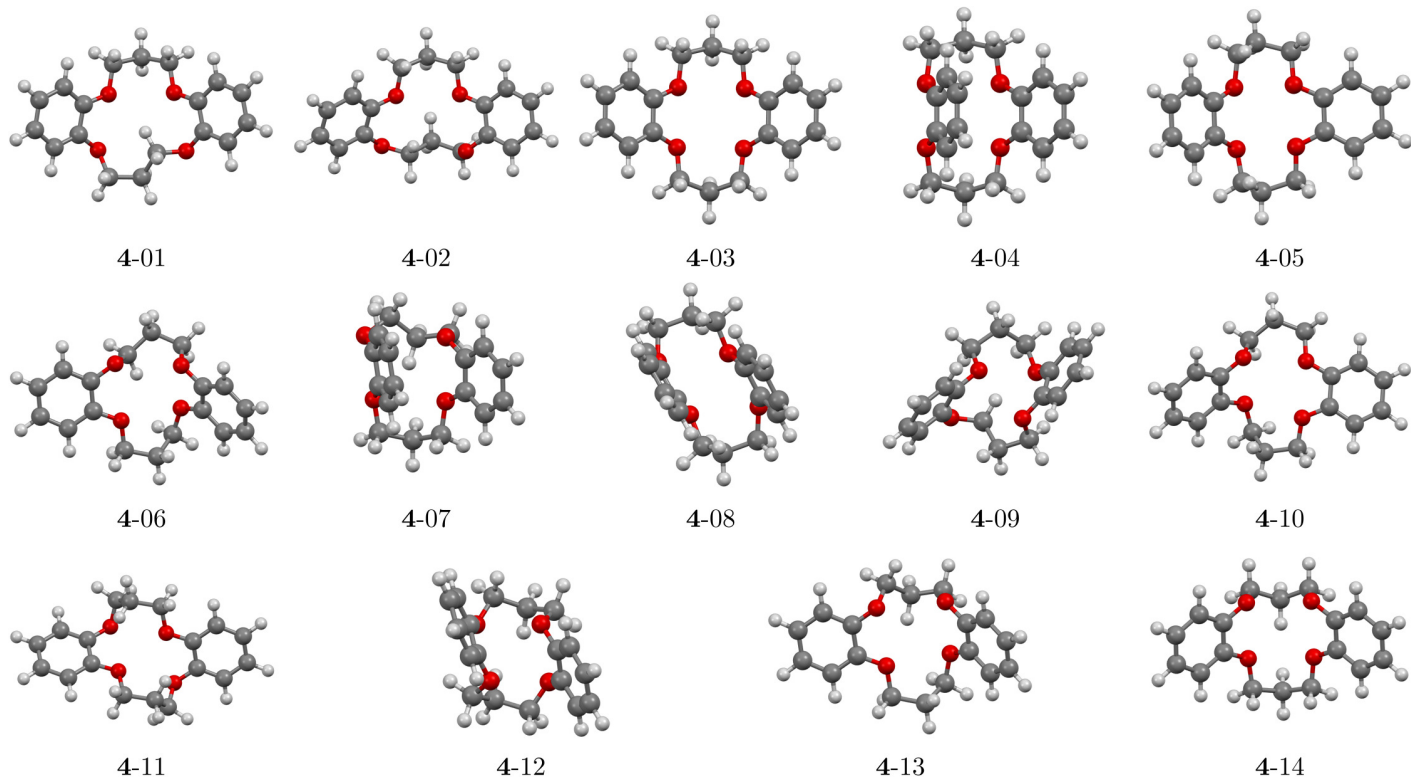

Figure S4: Crown 4 conformers optimized at M06-2X/6-31+G(d,p) level.

Table S4: Relative energy  $E$  (in kcal/mol) of crown 4 conformers computed at the M06-2X/6-31+G(d,p) level.

| Conformer | $E$ |
|-----------|-----|-----------|-----|-----------|-----|-----------|-----|-----------|-----|-----------|-----|
| 4-01      | 0.0 | 4-02      | 0.7 | 4-03      | 0.7 | 4-04      | 1.0 | 4-05      | 1.4 | 4-06      | 2.5 |
| 4-07      | 2.8 | 4-08      | 3.4 | 4-09      | 3.5 | 4-10      | 4.4 | 4-11      | 4.5 | 4-12      | 4.7 |
| 4-13      | 4.9 | 4-14      | 5.2 |           |     |           |     |           |     |           |     |

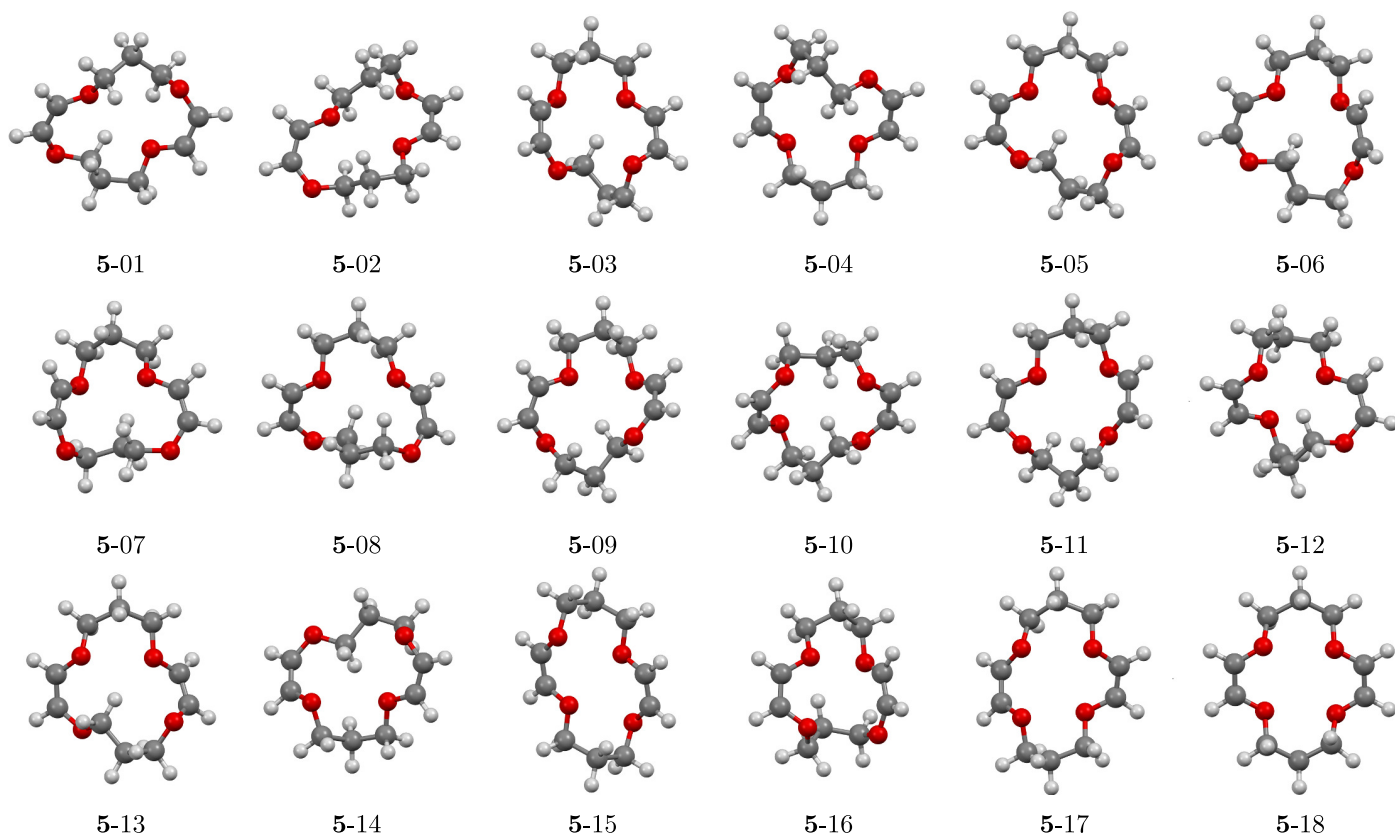

Figure S5: Crown 5 conformers optimized at M06-2X/6-31+G(d,p) level.

Table S5: Relative energy  $E$  (in kcal/mol) of crown 5 conformers computed at the M06-2X/6-31+G(d,p) level.

| Conformer | $E$ |
|-----------|-----|-----------|-----|-----------|-----|-----------|-----|-----------|-----|-----------|-----|
| 5-01      | 0.0 | 5-02      | 1.0 | 5-03      | 1.3 | 5-04      | 1.9 | 5-05      | 2.2 | 5-06      | 2.3 |
| 5-07      | 2.3 | 5-08      | 2.4 | 5-09      | 2.4 | 5-10      | 2.4 | 5-11      | 2.7 | 5-12      | 2.8 |
| 5-13      | 3.0 | 5-14      | 3.3 | 5-15      | 4.1 | 5-16      | 5.1 | 5-17      | 6.8 | 5-18      | 8.3 |

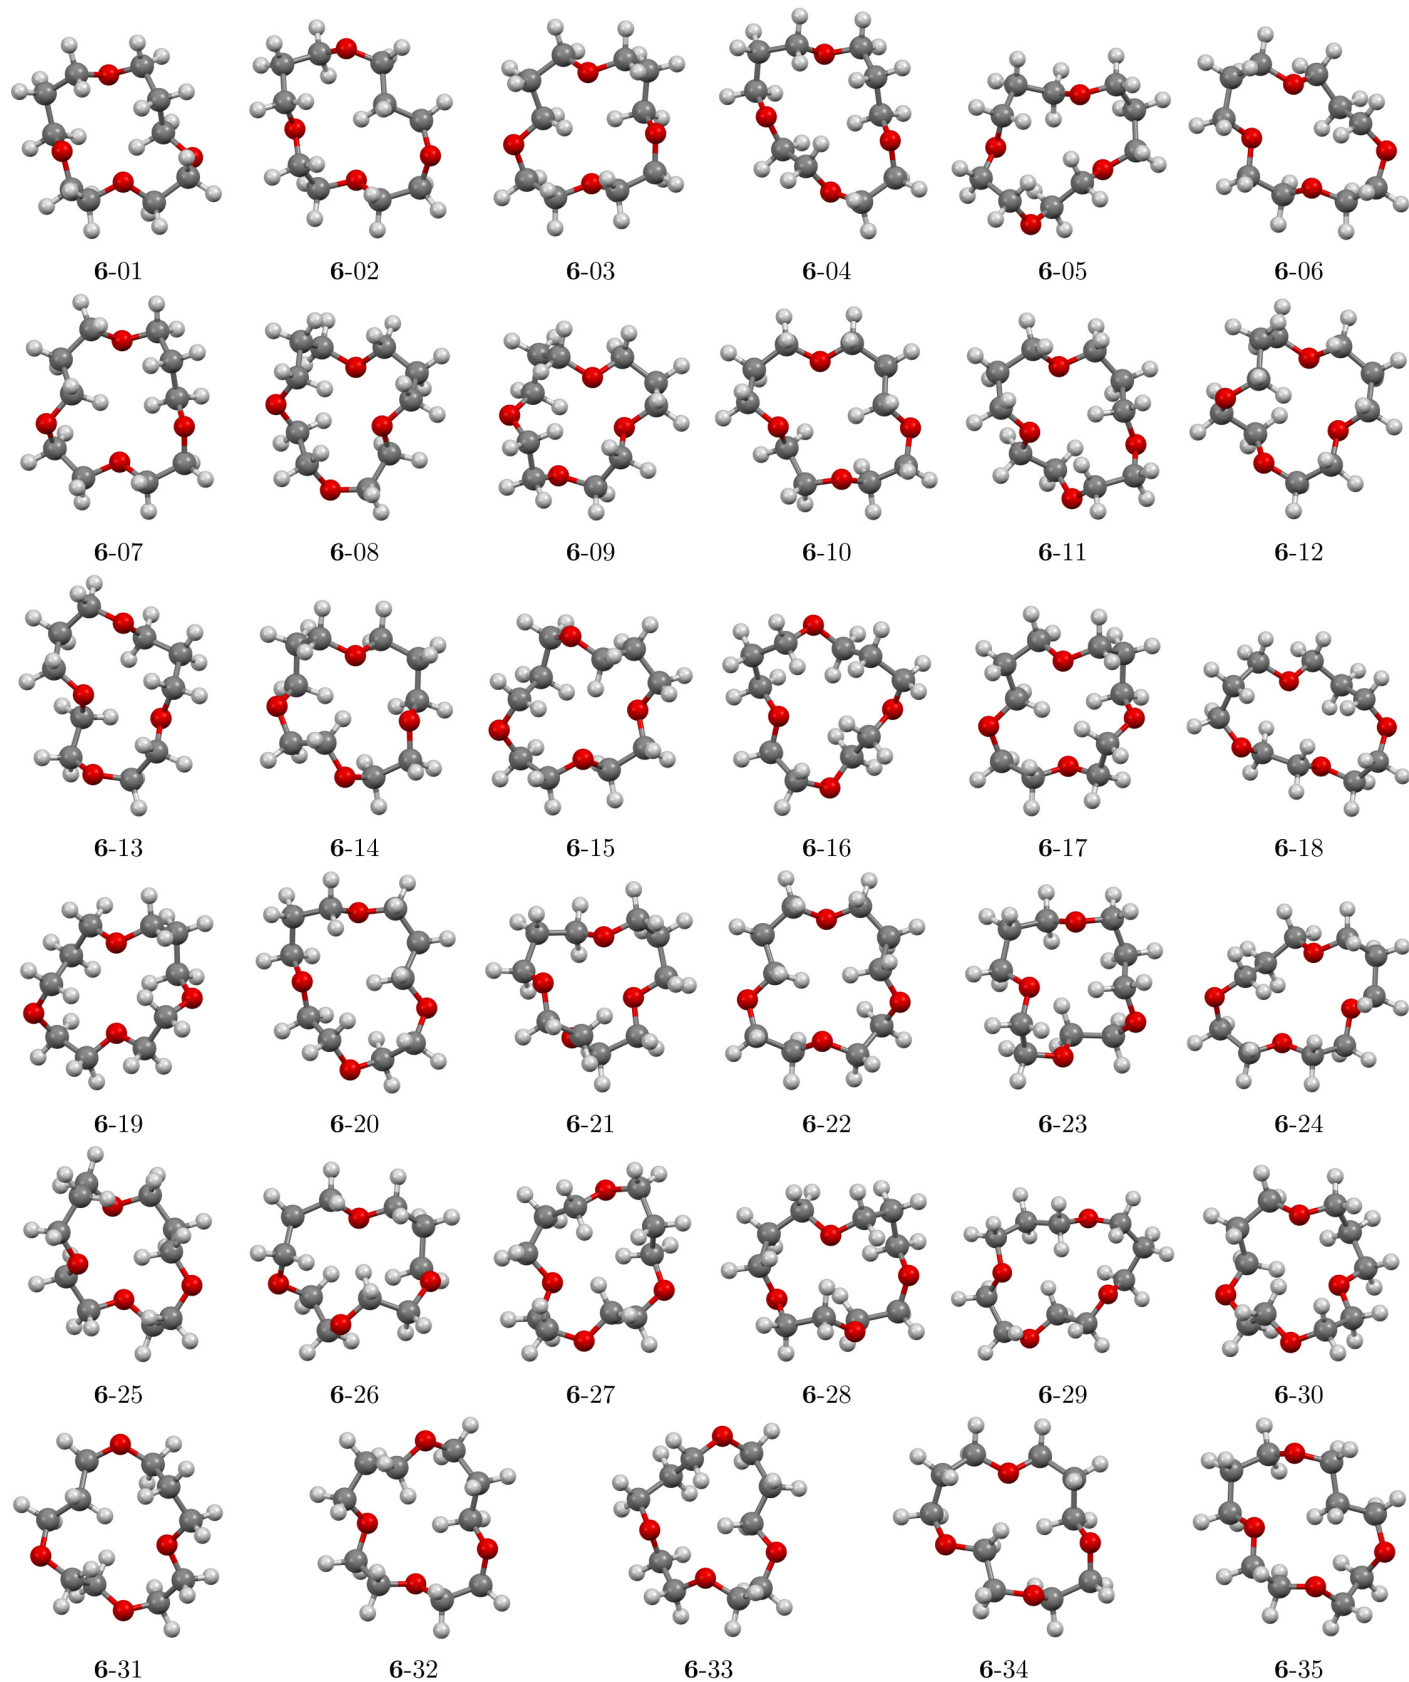

Figure S6: Crown 6 conformers optimized at M06-2X/6-31+G(d,p) level.

Table S6: Relative energy  $E$  (in kcal/mol) of crown **6** conformers computed at the M06-2X/6-31+G(d,p) level.

| Conformer | $E$ |
|-----------|-----|-----------|-----|-----------|-----|-----------|-----|-----------|-----|-----------|-----|
| 6-01      | 0.0 | 6-02      | 1.1 | 6-03      | 1.5 | 6-04      | 1.7 | 6-05      | 1.7 | 6-06      | 1.8 |
| 6-07      | 1.9 | 6-08      | 1.9 | 6-09      | 2.6 | 6-10      | 2.8 | 6-11      | 2.9 | 6-12      | 3.2 |
| 6-13      | 3.3 | 6-14      | 3.4 | 6-15      | 3.6 | 6-16      | 3.7 | 6-17      | 3.7 | 6-18      | 3.8 |
| 6-19      | 3.8 | 6-20      | 3.9 | 6-21      | 4.2 | 6-22      | 4.2 | 6-23      | 4.3 | 6-24      | 4.3 |
| 6-25      | 4.4 | 6-26      | 4.6 | 6-27      | 5.1 | 6-28      | 5.1 | 6-29      | 5.1 | 6-30      | 5.2 |
| 6-31      | 5.7 | 6-32      | 5.8 | 6-33      | 6.3 | 6-34      | 6.5 | 6-35      | 7.7 |           |     |

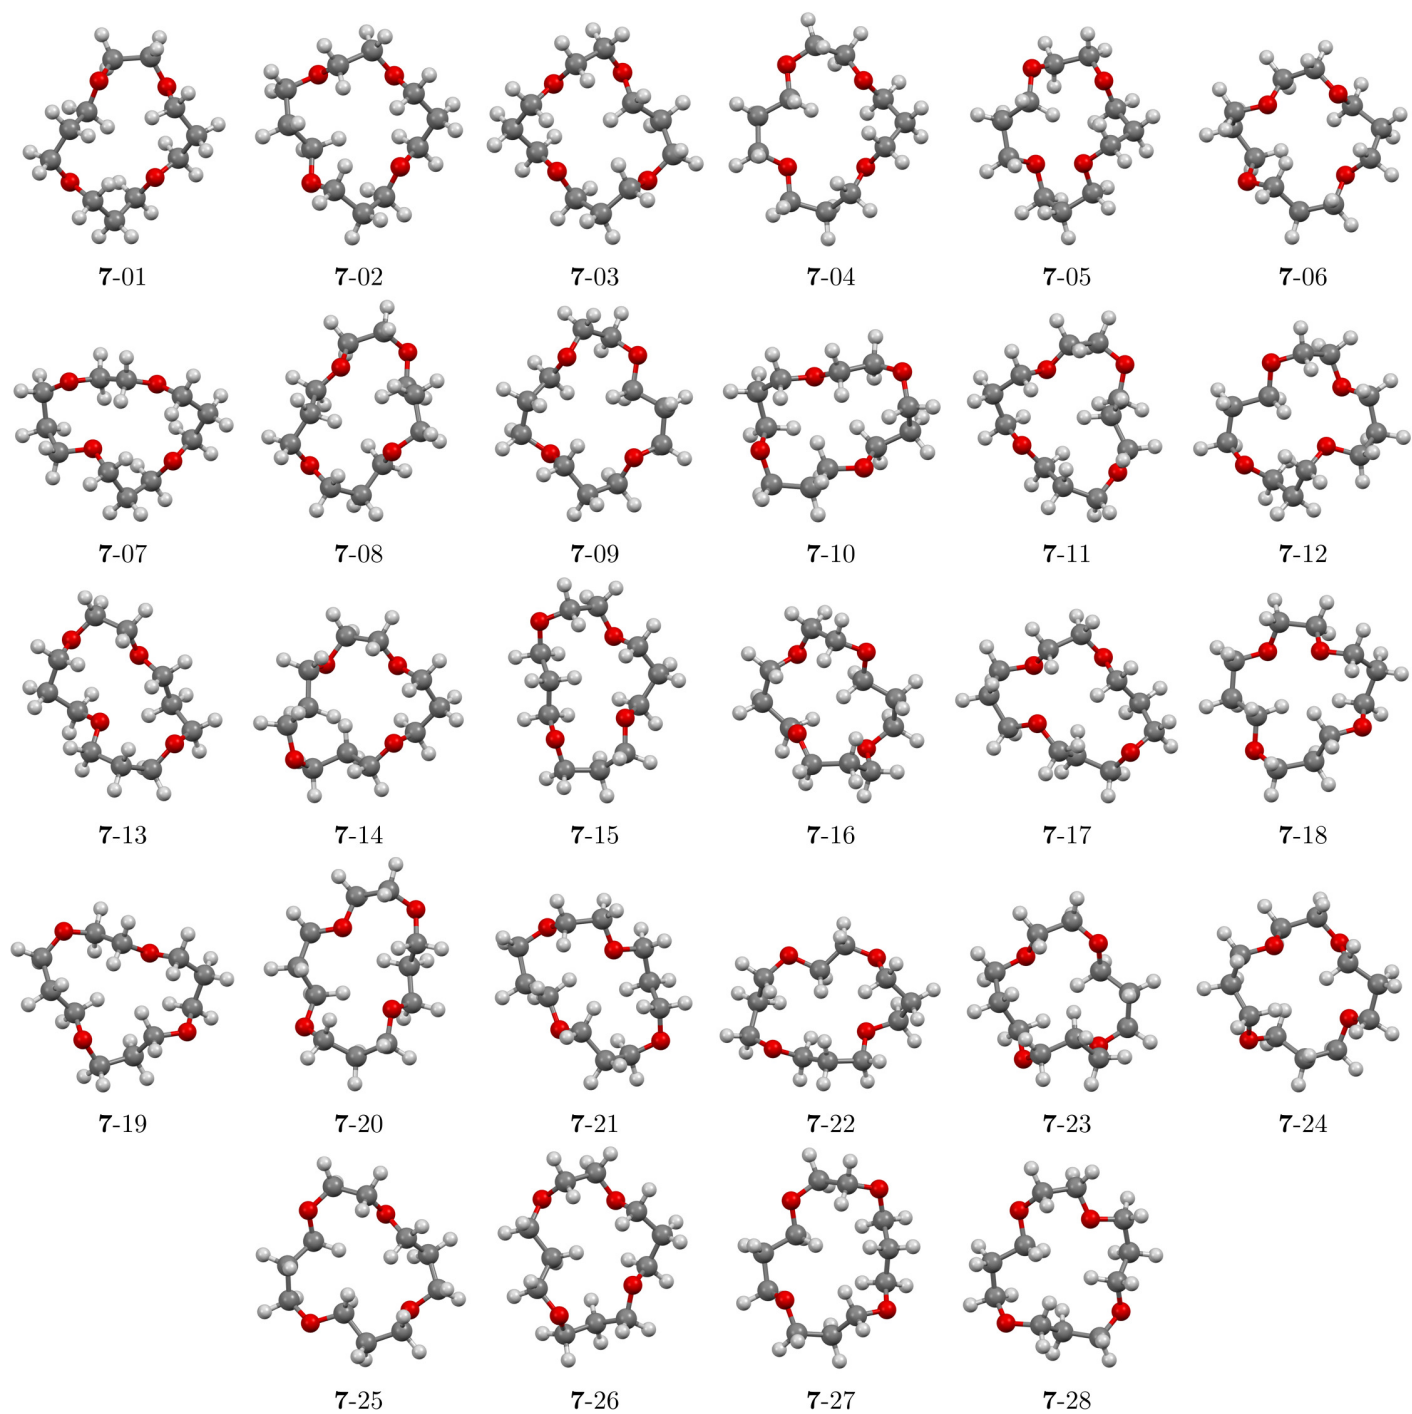

Figure S7: Crown 7 conformers optimized at M06-2X/6-31+G(d,p) level.

Table S7: Relative energy  $E$  (in kcal/mol) of crown 7 conformers computed at the M06-2X/6-31+G(d,p) level.

| Conformer | $E$ | Conformer | $E$ | Conformer | $E$ | Conformer | $E$  | Conformer | $E$ | Conformer | $E$ |
|-----------|-----|-----------|-----|-----------|-----|-----------|------|-----------|-----|-----------|-----|
| 7-01      | 0.0 | 7-02      | 1.4 | 7-03      | 1.7 | 7-04      | 2.9  | 7-05      | 3.2 | 7-06      | 3.4 |
| 7-07      | 4.0 | 7-08      | 4.4 | 7-09      | 4.4 | 7-10      | 4.9  | 7-11      | 4.9 | 7-12      | 5.5 |
| 7-13      | 5.7 | 7-14      | 5.7 | 7-15      | 5.7 | 7-16      | 5.8  | 7-17      | 5.8 | 7-18      | 5.9 |
| 7-19      | 6.1 | 7-20      | 6.1 | 7-21      | 6.4 | 7-22      | 6.7  | 7-23      | 7.4 | 7-24      | 7.7 |
| 7-25      | 8.3 | 7-26      | 8.7 | 7-27      | 9.1 | 7-28      | 10.3 |           |     |           |     |

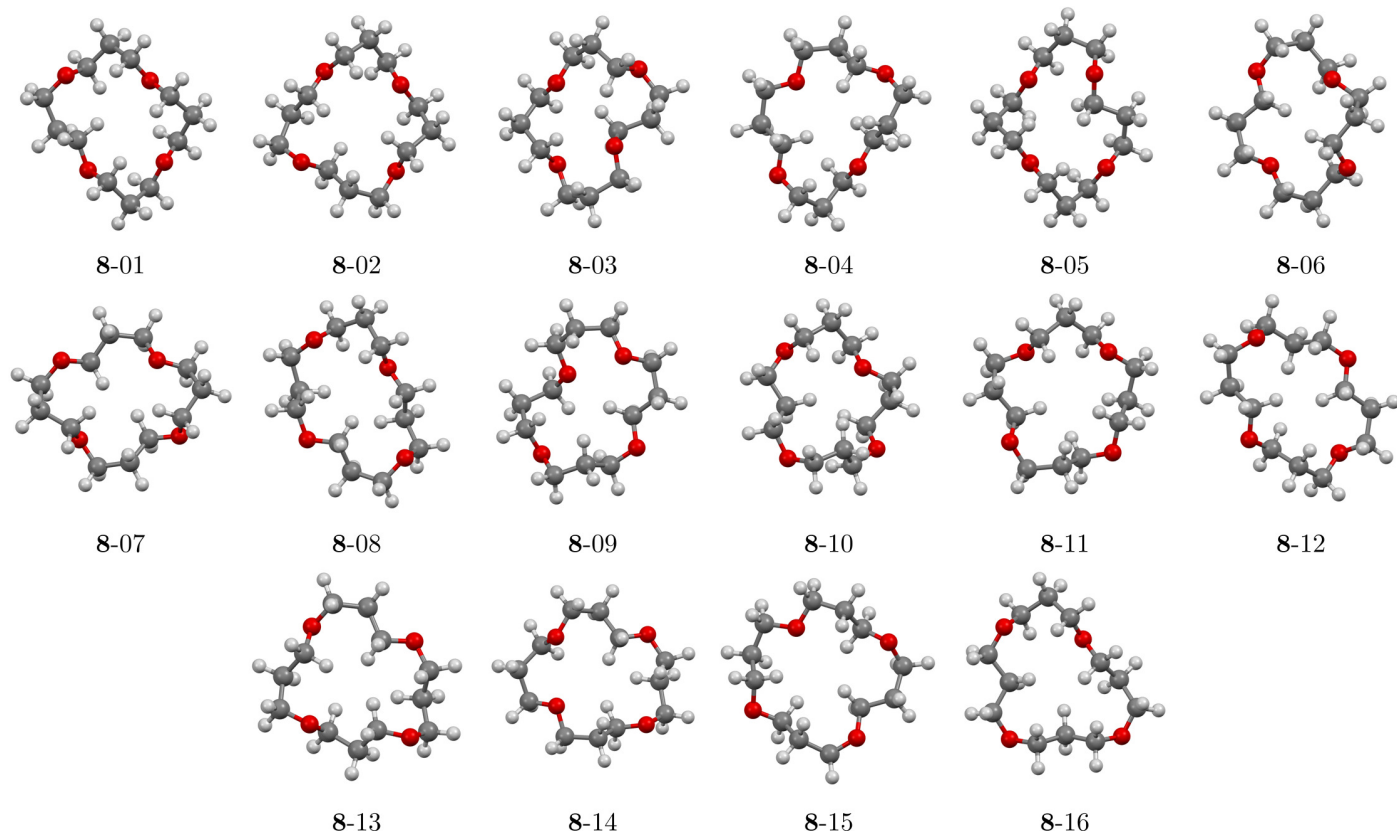

Figure S8: Crown **8** conformers optimized at M06-2X/6-31+G(d,p) level.

Table S8: Relative energy  $E$  (in kcal/mol) of crown **8** conformers computed at the M06-2X/6-31+G(d,p) level.

| Conformer | $E$ | Conformer | $E$ | Conformer | $E$  | Conformer | $E$  | Conformer | $E$ | Conformer | $E$ |
|-----------|-----|-----------|-----|-----------|------|-----------|------|-----------|-----|-----------|-----|
| 8-01      | 0.0 | 8-02      | 2.6 | 8-03      | 3.0  | 8-04      | 3.7  | 8-05      | 4.6 | 8-06      | 4.7 |
| 8-07      | 4.7 | 8-08      | 5.9 | 8-09      | 6.7  | 8-10      | 7.5  | 8-11      | 8.1 | 8-12      | 8.8 |
| 8-13      | 9.7 | 8-14      | 9.7 | 8-15      | 10.2 | 8-16      | 10.7 |           |     |           |     |



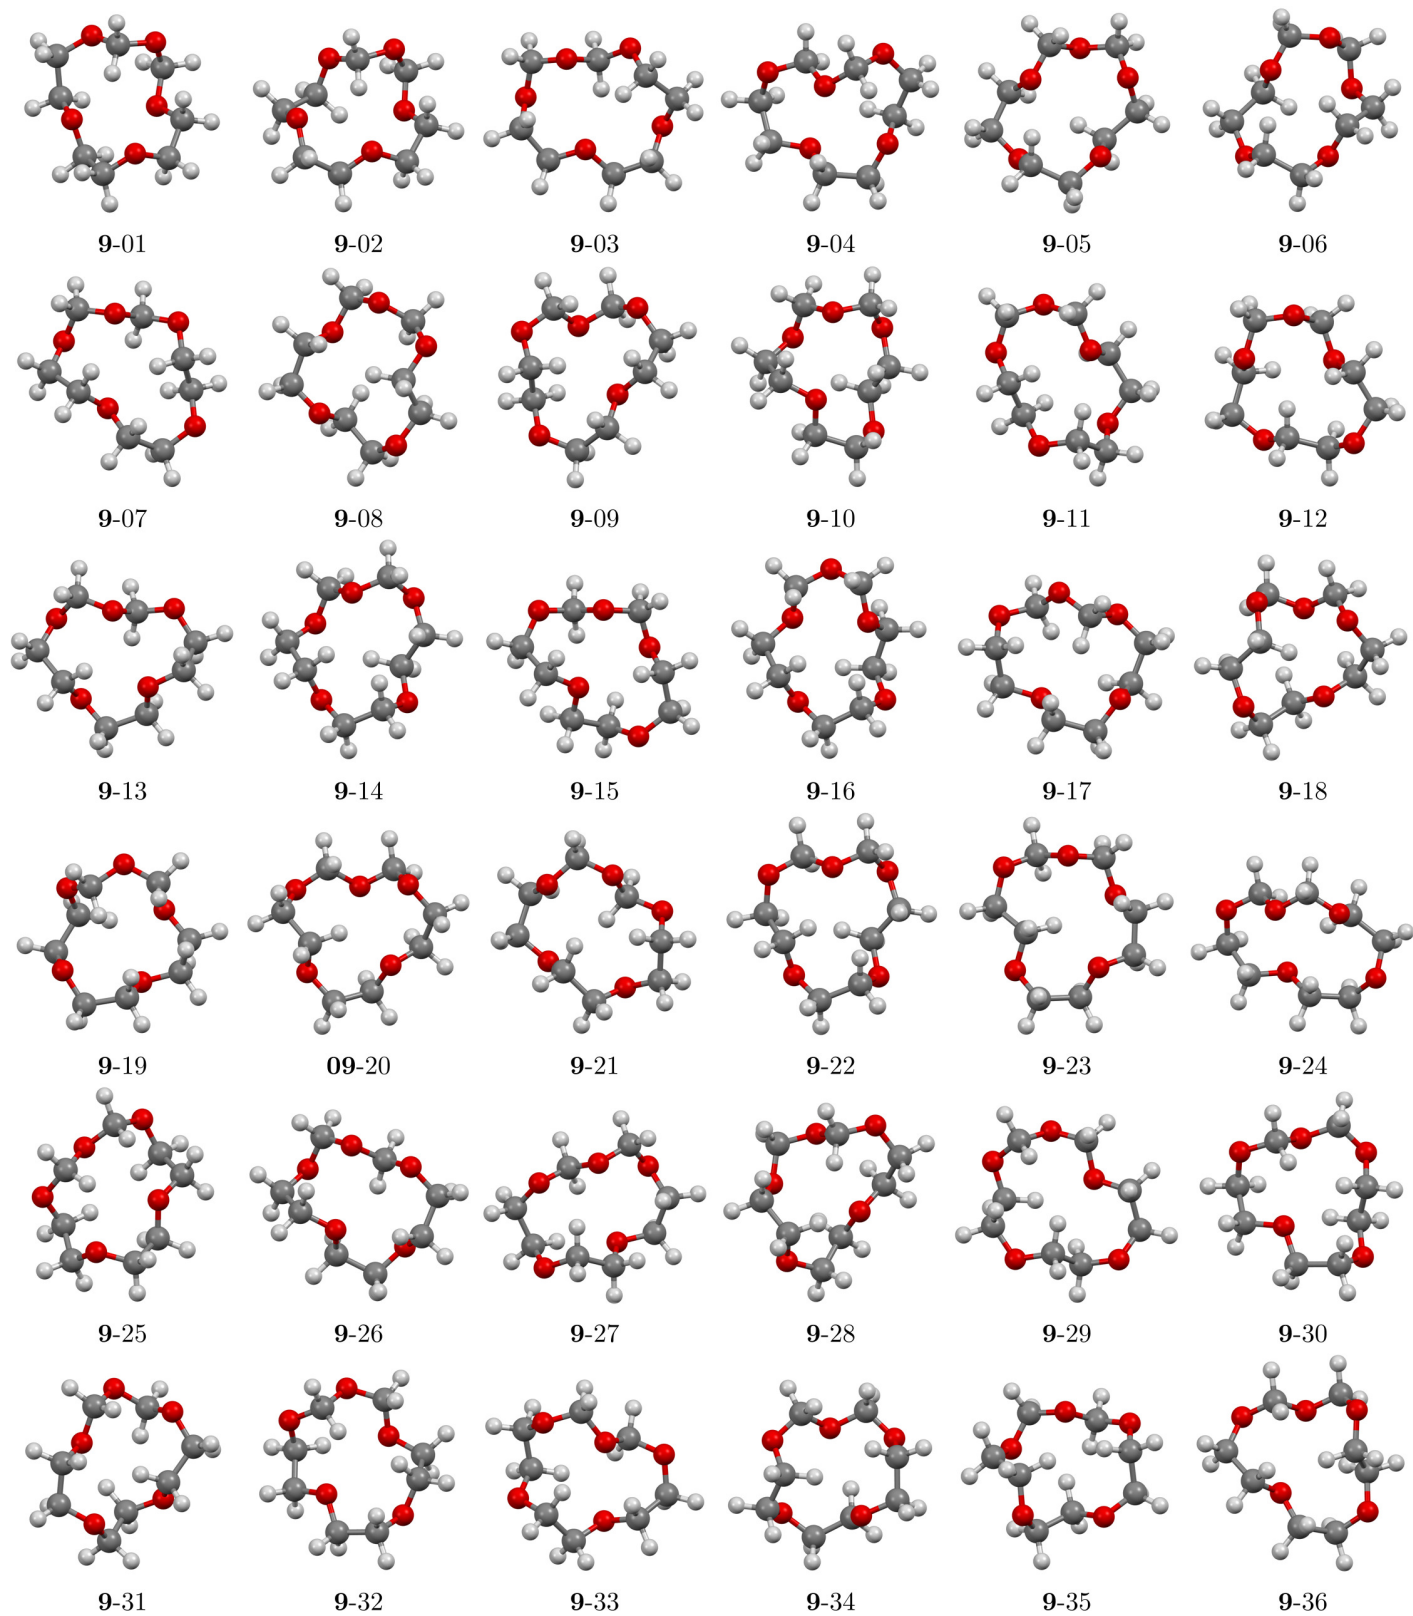

Figure S9: Crown 9 conformers optimized at M06-2X/6-31+G(d,p) level.

Table S9: Relative energy  $E$  (in kcal/mol) of crown **9** conformers computed at the M06-2X/6-31+G(d,p) level.

| Conformer | $E$ |
|-----------|-----|-----------|-----|-----------|-----|-----------|-----|-----------|-----|-----------|-----|
| 9-01      | 0.0 | 9-02      | 1.0 | 9-03      | 1.3 | 9-04      | 1.5 | 9-05      | 1.6 | 9-06      | 1.7 |
| 9-07      | 1.8 | 9-08      | 2.2 | 9-09      | 2.5 | 9-10      | 3.1 | 9-11      | 3.3 | 9-12      | 3.3 |
| 9-13      | 3.3 | 9-14      | 3.6 | 9-15      | 3.8 | 9-16      | 4.2 | 9-17      | 4.3 | 9-18      | 4.5 |
| 9-19      | 4.8 | 9-20      | 5.0 | 9-21      | 5.2 | 9-22      | 5.4 | 9-23      | 5.4 | 9-24      | 5.5 |
| 9-25      | 5.6 | 9-26      | 5.6 | 9-27      | 6.2 | 9-28      | 6.2 | 9-29      | 6.3 | 9-30      | 6.6 |
| 9-31      | 6.6 | 9-32      | 6.7 | 9-33      | 6.7 | 9-34      | 6.9 | 9-35      | 9.3 | 9-36      | 9.7 |

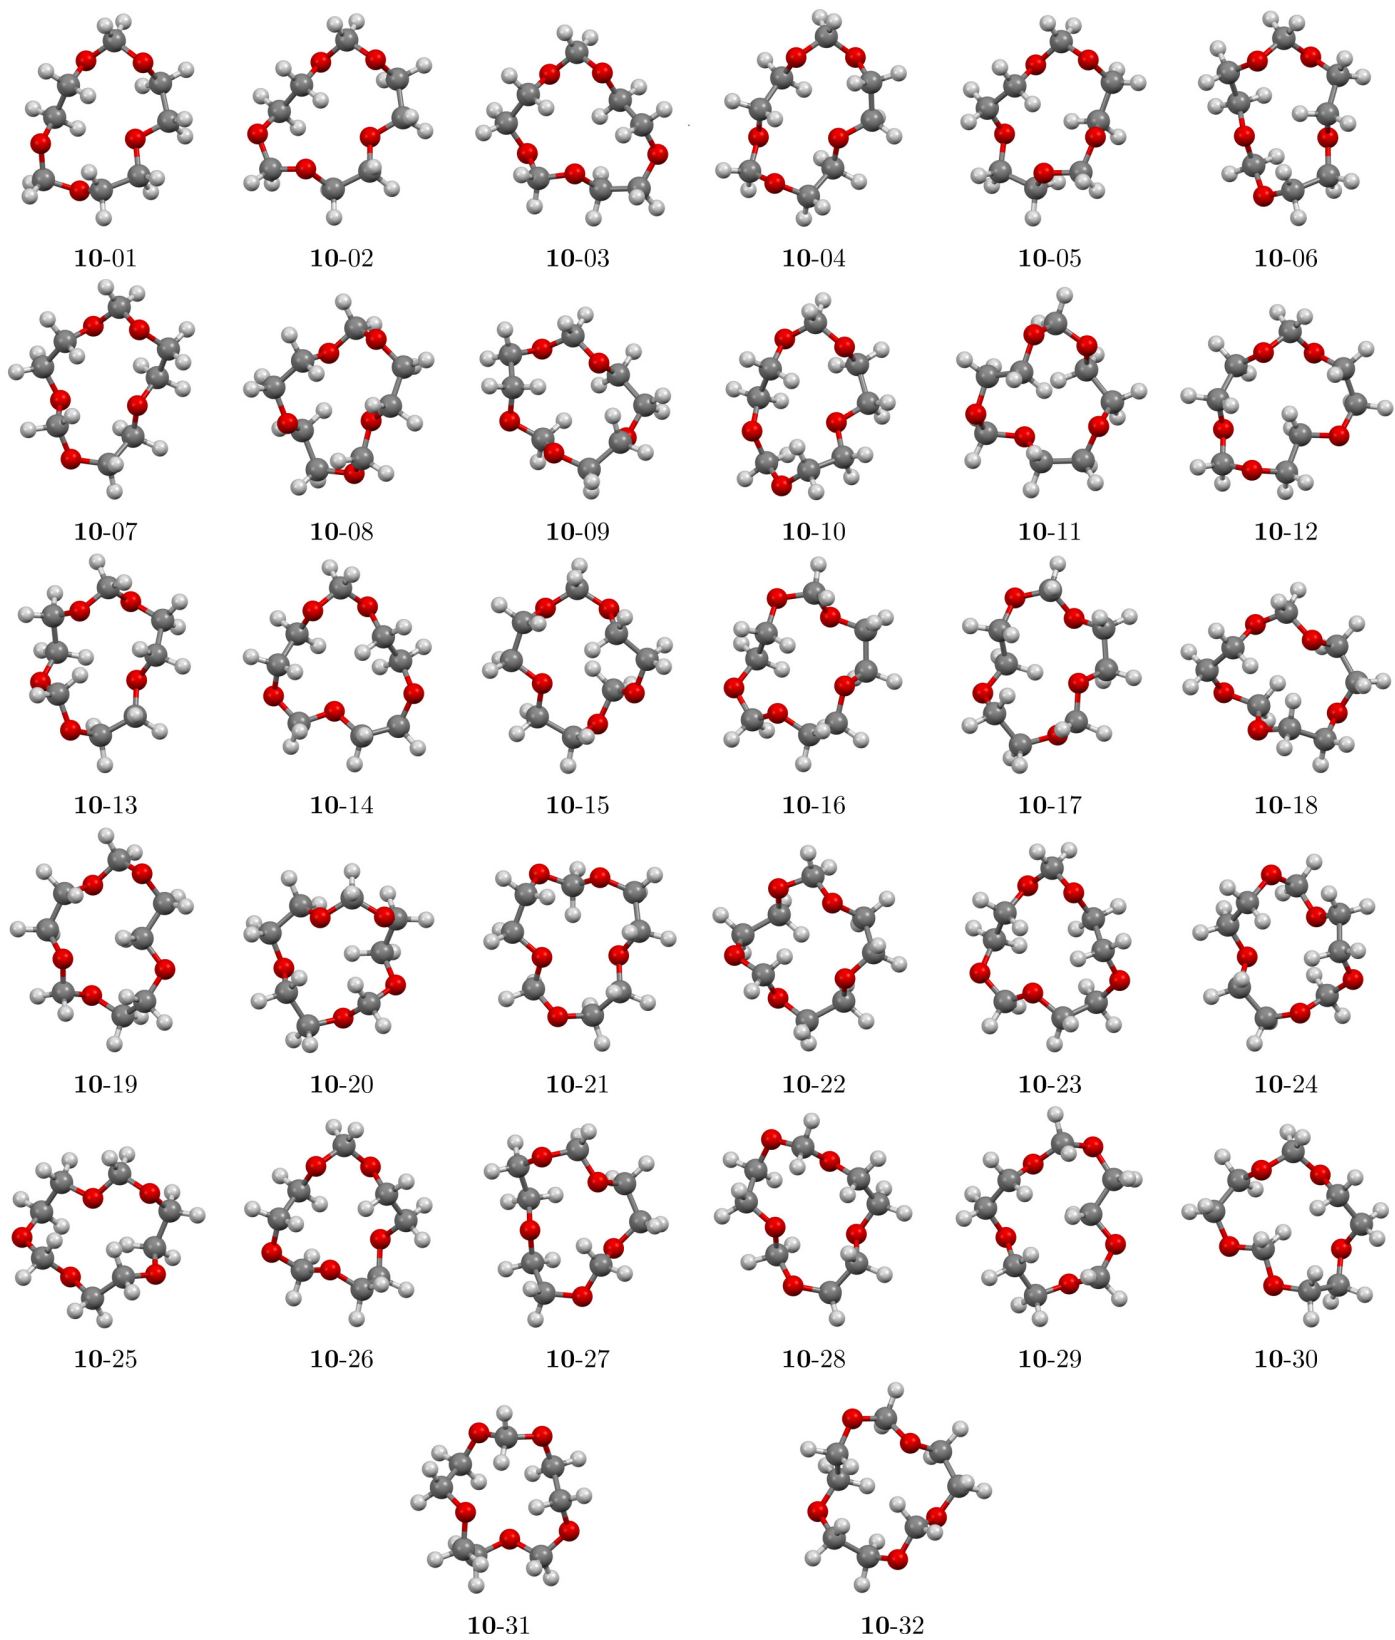

Figure S10: Crown 10 conformers optimized at M06-2X/6-31+G(d,p) level.

Table S10: Relative energy  $E$  (in kcal/mol) of crown **10** conformers computed at the M06-2X/6-31+G(d,p) level.

| Conformer    | $E$ | Conformer    | $E$  | Conformer    | $E$ | Conformer    | $E$ | Conformer    | $E$ | Conformer    | $E$ |
|--------------|-----|--------------|------|--------------|-----|--------------|-----|--------------|-----|--------------|-----|
| <b>10-01</b> | 0.0 | <b>10-02</b> | 2.2  | <b>10-03</b> | 2.3 | <b>10-04</b> | 2.9 | <b>10-05</b> | 3.2 | <b>10-06</b> | 3.2 |
| <b>10-07</b> | 3.3 | <b>10-08</b> | 4.2  | <b>10-09</b> | 4.4 | <b>10-10</b> | 4.5 | <b>10-11</b> | 4.5 | <b>10-12</b> | 4.8 |
| <b>10-13</b> | 5.1 | <b>10-14</b> | 5.3  | <b>10-15</b> | 5.6 | <b>10-16</b> | 6.0 | <b>10-17</b> | 6.3 | <b>10-18</b> | 6.4 |
| <b>10-19</b> | 6.6 | <b>10-20</b> | 6.7  | <b>10-21</b> | 6.8 | <b>10-22</b> | 6.8 | <b>10-23</b> | 7.0 | <b>10-24</b> | 7.6 |
| <b>10-25</b> | 7.6 | <b>10-26</b> | 7.8  | <b>10-27</b> | 8.1 | <b>10-28</b> | 8.3 | <b>10-29</b> | 9.3 | <b>10-30</b> | 9.6 |
| <b>10-31</b> | 9.9 | <b>10-32</b> | 10.5 |              |     |              |     |              |     |              |     |

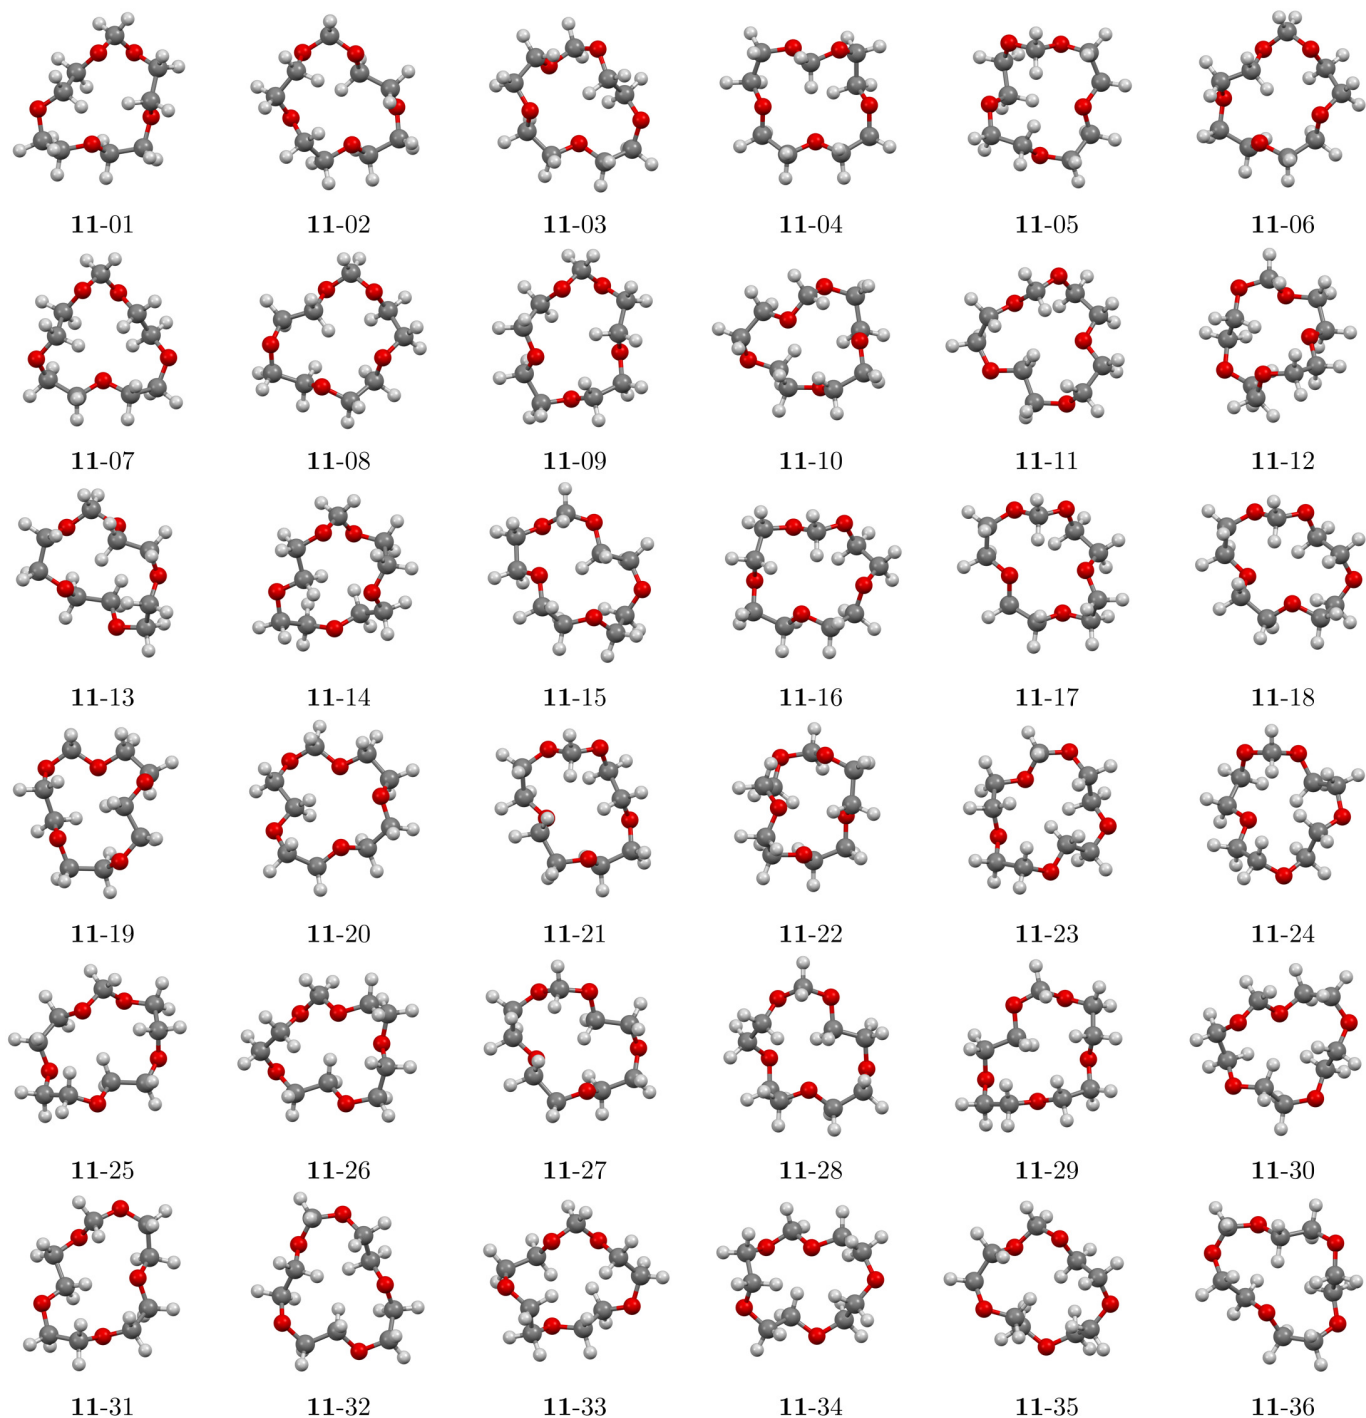

Figure S11: Crown 11 conformers optimized at M06-2X/6-31+G(d,p) level.

Table S11: Relative energy  $E$  (in kcal/mol) of crown 11 conformers computed at the M06-2X/6-31+G(d,p) level.

| Conformer | $E$ |
|-----------|-----|-----------|-----|-----------|-----|-----------|-----|-----------|-----|-----------|-----|
| 11-01     | 0.0 | 11-02     | 0.7 | 11-03     | 1.7 | 11-04     | 2.5 | 11-05     | 2.8 | 11-06     | 2.9 |
| 11-07     | 3.1 | 11-08     | 3.3 | 11-09     | 3.5 | 11-10     | 4.3 | 11-11     | 4.6 | 11-12     | 4.8 |
| 11-13     | 5.1 | 11-14     | 5.1 | 11-15     | 5.1 | 11-16     | 5.2 | 11-17     | 5.6 | 11-18     | 5.8 |
| 11-19     | 5.8 | 11-20     | 5.9 | 11-21     | 5.9 | 11-22     | 6.1 | 11-23     | 6.6 | 11-24     | 6.7 |
| 11-25     | 6.7 | 11-26     | 6.9 | 11-27     | 7.0 | 11-28     | 7.0 | 11-29     | 7.0 | 11-30     | 7.2 |
| 11-31     | 7.5 | 11-32     | 7.8 | 11-33     | 8.3 | 11-34     | 8.6 | 11-35     | 9.1 | 11-36     | 9.3 |



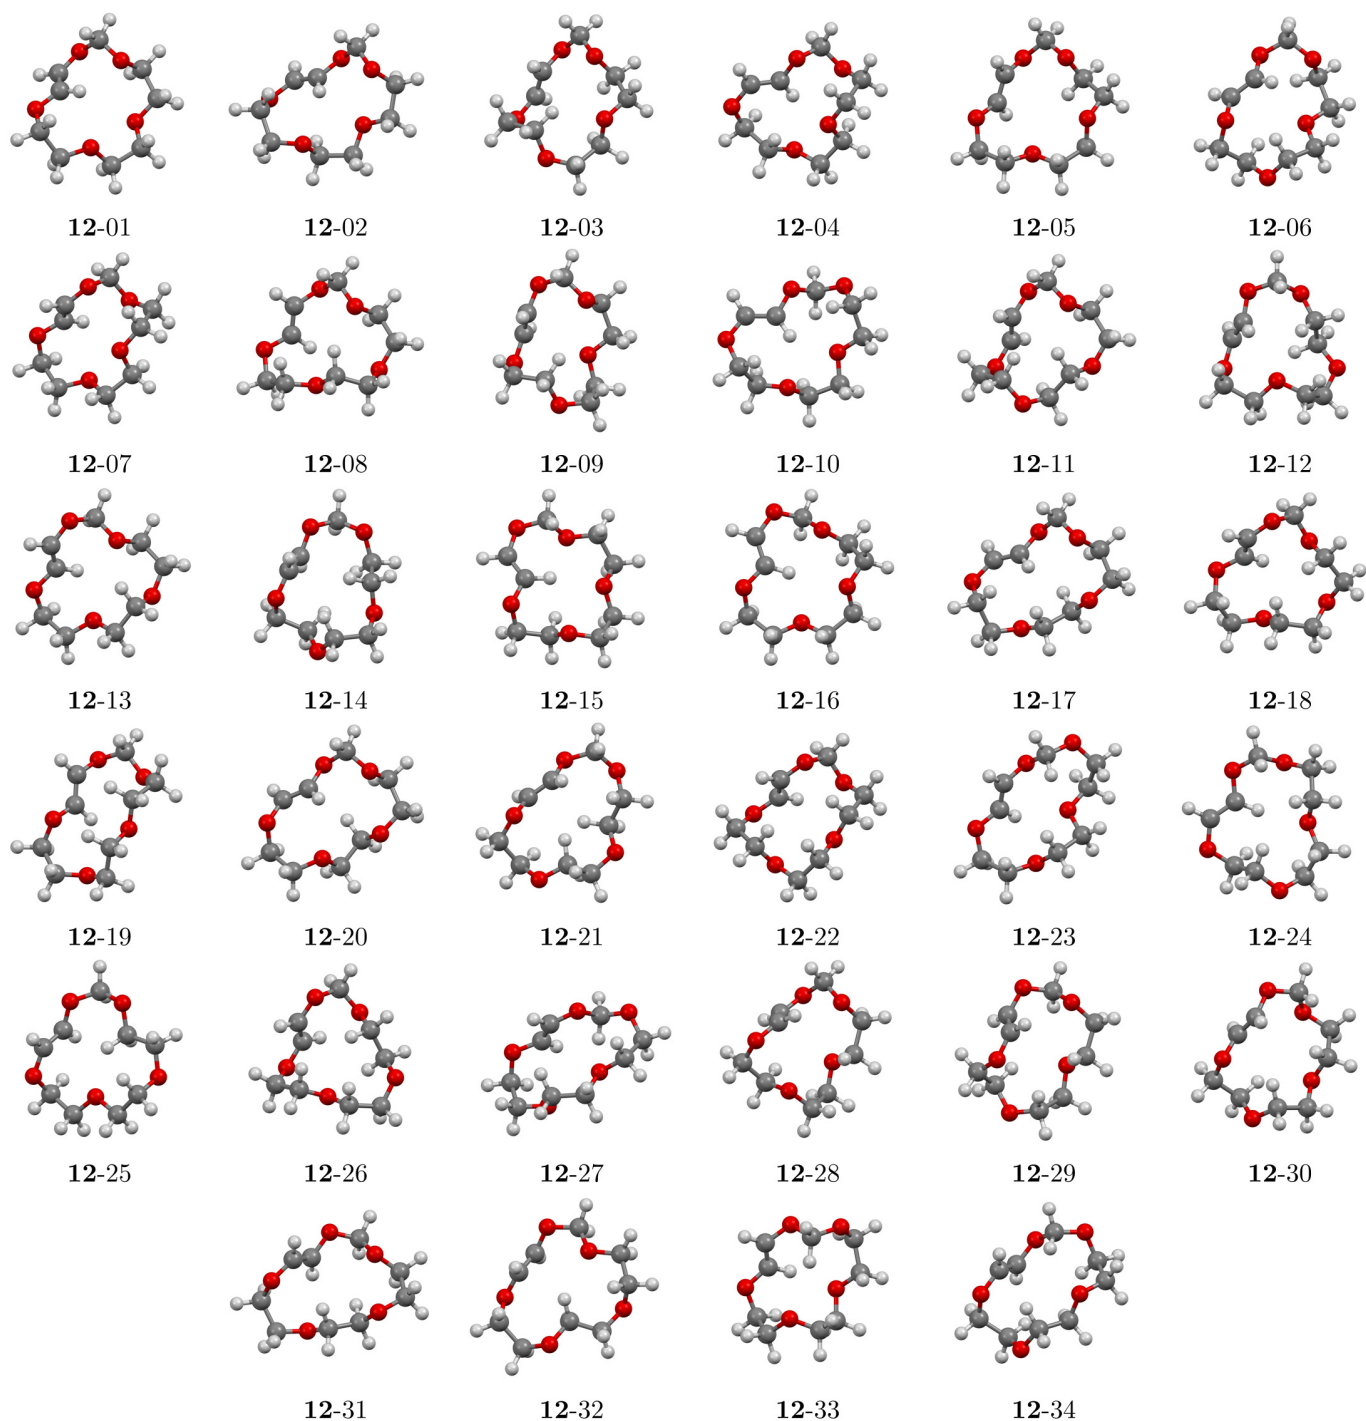

Figure S12: Crown 12 conformers optimized at M06-2X/6-31+G(d,p) level.

Table S12: Relative energy  $E$  (in kcal/mol) of crown 12 conformers computed at the M06-2X/6-31+G(d,p) level.

| Conformer | $E$ |
|-----------|-----|-----------|-----|-----------|-----|-----------|-----|-----------|-----|-----------|-----|
| 12-01     | 0.0 | 12-02     | 0.7 | 12-03     | 1.0 | 12-04     | 1.2 | 12-05     | 1.5 | 12-06     | 1.5 |
| 12-07     | 1.5 | 12-08     | 1.9 | 12-09     | 2.2 | 12-10     | 2.6 | 12-11     | 2.7 | 12-12     | 2.8 |
| 12-13     | 3.1 | 12-14     | 3.2 | 12-15     | 3.4 | 12-16     | 3.4 | 12-17     | 3.5 | 12-18     | 3.7 |
| 12-19     | 4.4 | 12-20     | 4.5 | 12-21     | 4.5 | 12-22     | 4.6 | 12-23     | 4.8 | 12-24     | 5.2 |
| 12-25     | 5.2 | 12-26     | 5.3 | 12-27     | 5.4 | 12-28     | 5.5 | 12-29     | 5.5 | 12-30     | 5.7 |
| 12-31     | 6.3 | 12-32     | 6.3 | 12-33     | 8.2 | 12-34     | 8.4 |           |     |           |     |



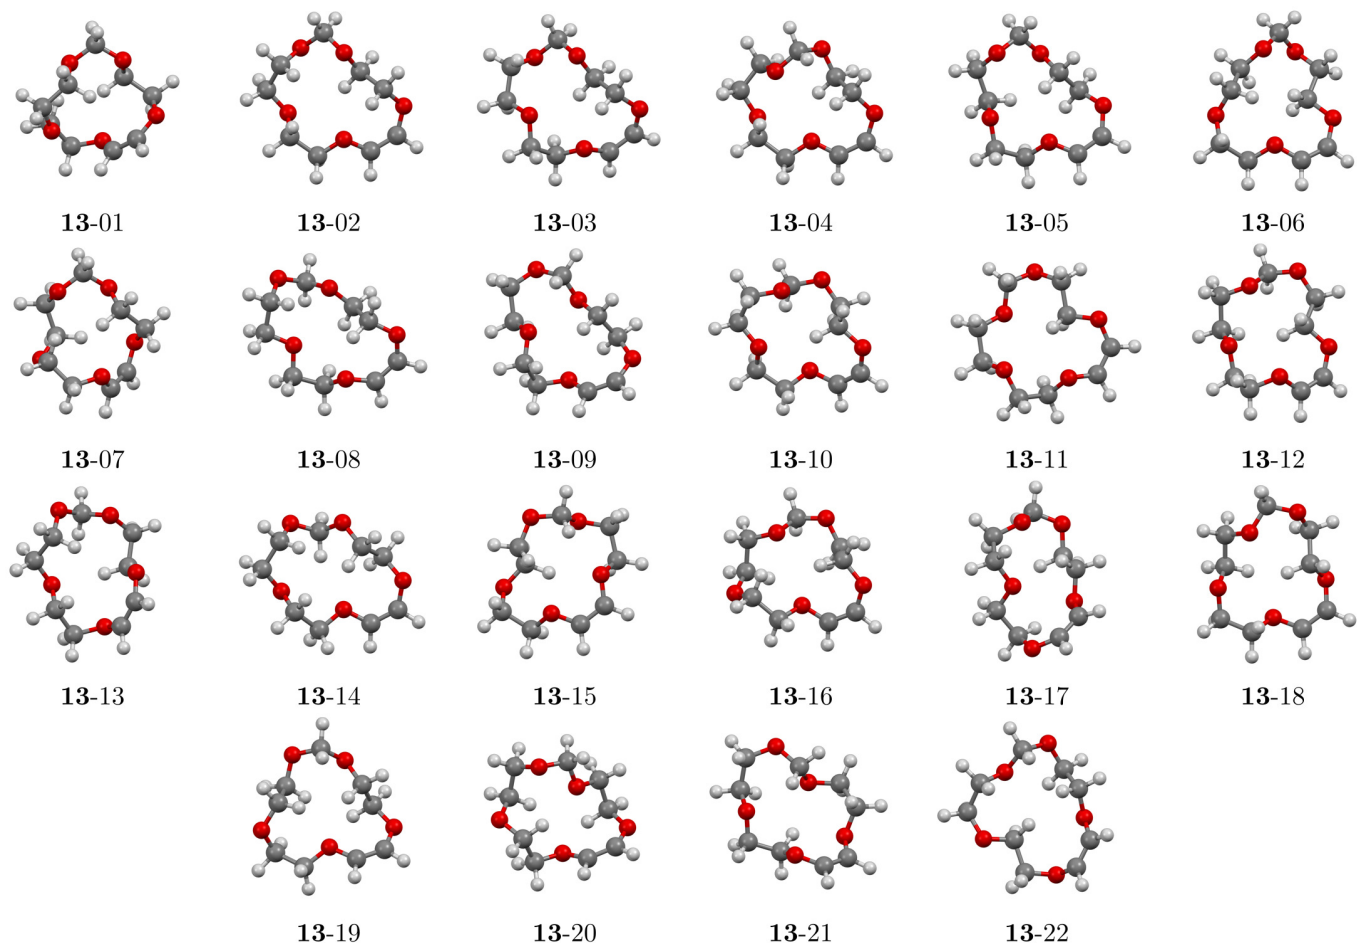

Figure S13: Crown **13** conformers optimized at M06-2X/6-31+G(d,p) level.

Table S13: Relative energy  $E$  (in kcal/mol) of crown **13** conformers computed at the M06-2X/6-31+G(d,p) level.

| Conformer | $E$ |
|-----------|-----|-----------|-----|-----------|-----|-----------|-----|-----------|-----|-----------|-----|
| 13-01     | 0.0 | 13-02     | 0.2 | 13-03     | 1.0 | 13-04     | 1.2 | 13-05     | 1.2 | 13-06     | 1.4 |
| 13-07     | 2.0 | 13-08     | 2.3 | 13-09     | 3.0 | 13-10     | 3.3 | 13-11     | 4.0 | 13-12     | 4.1 |
| 13-13     | 4.1 | 13-14     | 4.2 | 13-15     | 4.3 | 13-16     | 4.8 | 13-17     | 4.8 | 13-18     | 4.9 |
| 13-19     | 5.2 | 13-20     | 5.9 | 13-21     | 7.1 | 13-22     | 7.2 |           |     |           |     |

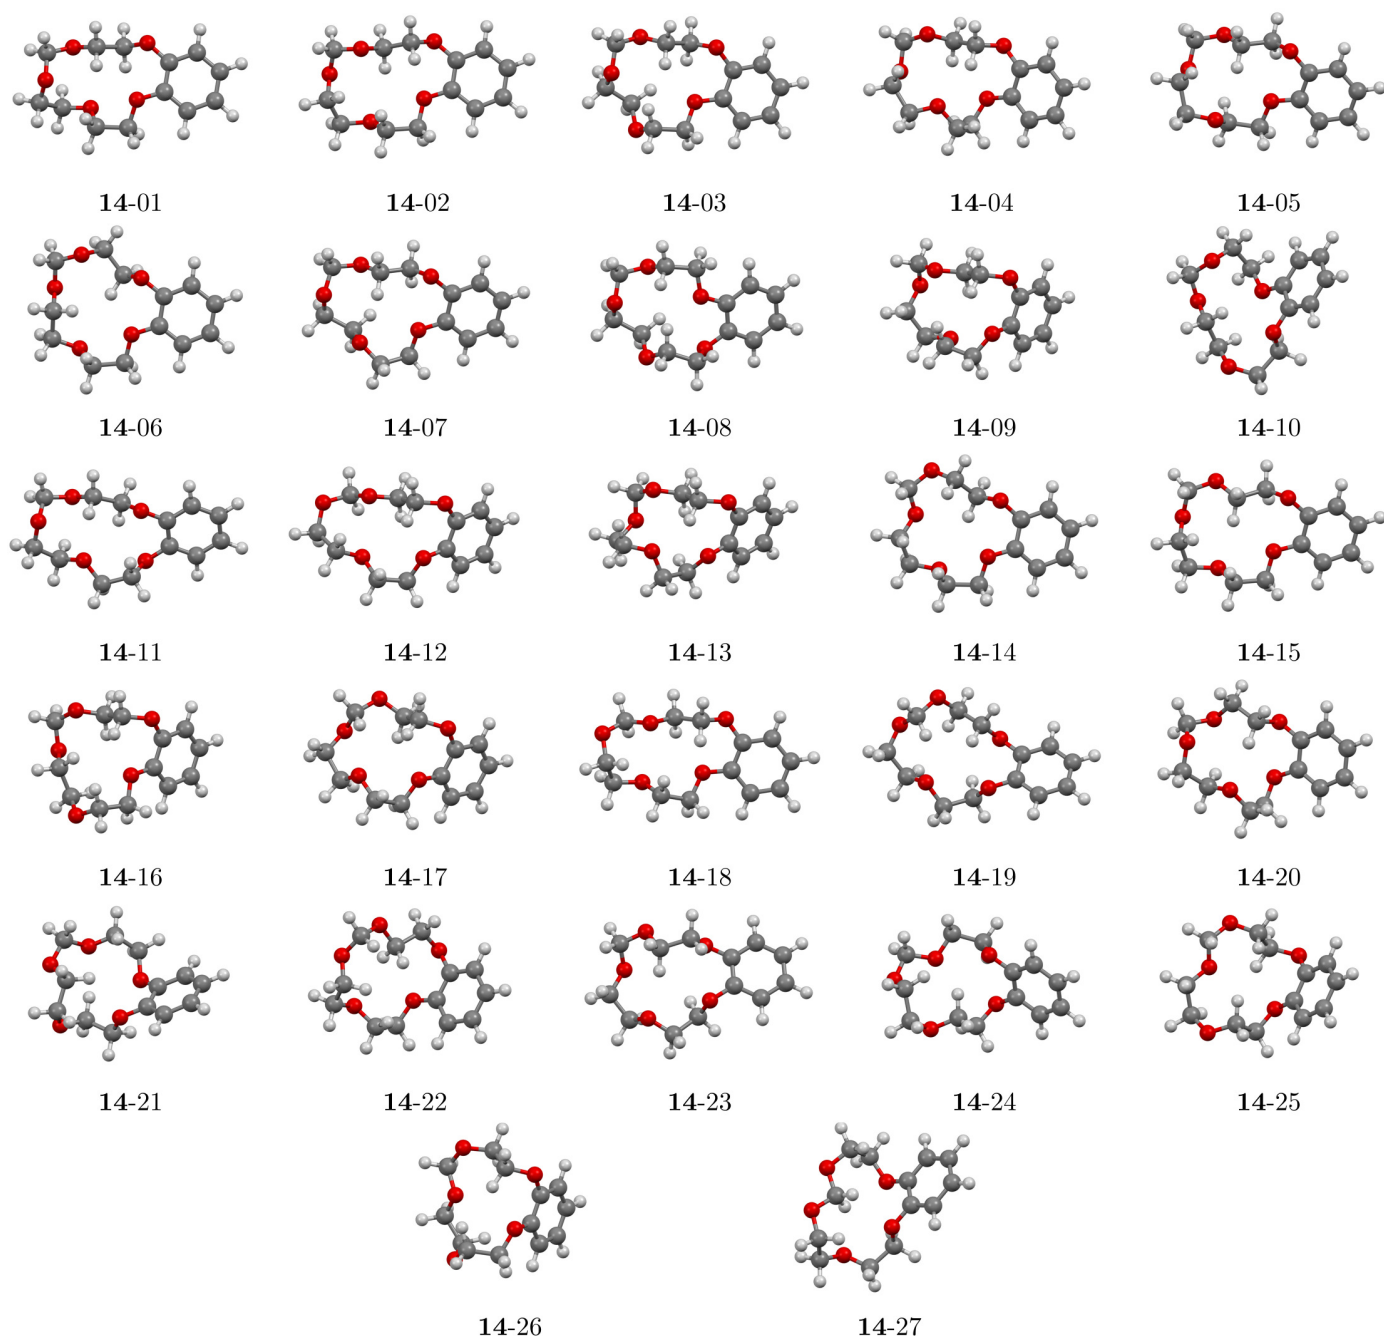

Figure S14: Crown **14** conformers optimized at M06-2X/6-31+G(d,p) level.

Table S14: Relative energy  $E$  (in kcal/mol) of crown **14** conformers computed at the M06-2X/6-31+G(d,p) level.

| Conformer | $E$ |
|-----------|-----|-----------|-----|-----------|-----|-----------|-----|-----------|-----|-----------|-----|
| 14-01     | 0.0 | 14-02     | 0.5 | 14-03     | 0.8 | 14-04     | 1.6 | 14-05     | 1.6 | 14-06     | 1.9 |
| 14-07     | 2.0 | 14-08     | 2.4 | 14-09     | 2.5 | 14-10     | 2.6 | 14-11     | 2.8 | 14-12     | 3.2 |
| 14-13     | 3.3 | 14-14     | 3.9 | 14-15     | 4.1 | 14-16     | 4.2 | 14-17     | 4.2 | 14-18     | 4.4 |
| 14-19     | 4.5 | 14-20     | 4.8 | 14-21     | 5.5 | 14-22     | 5.6 | 14-23     | 6.2 | 14-24     | 6.7 |
| 14-25     | 6.9 | 14-26     | 8.1 | 14-27     | 8.1 |           |     |           |     |           |     |

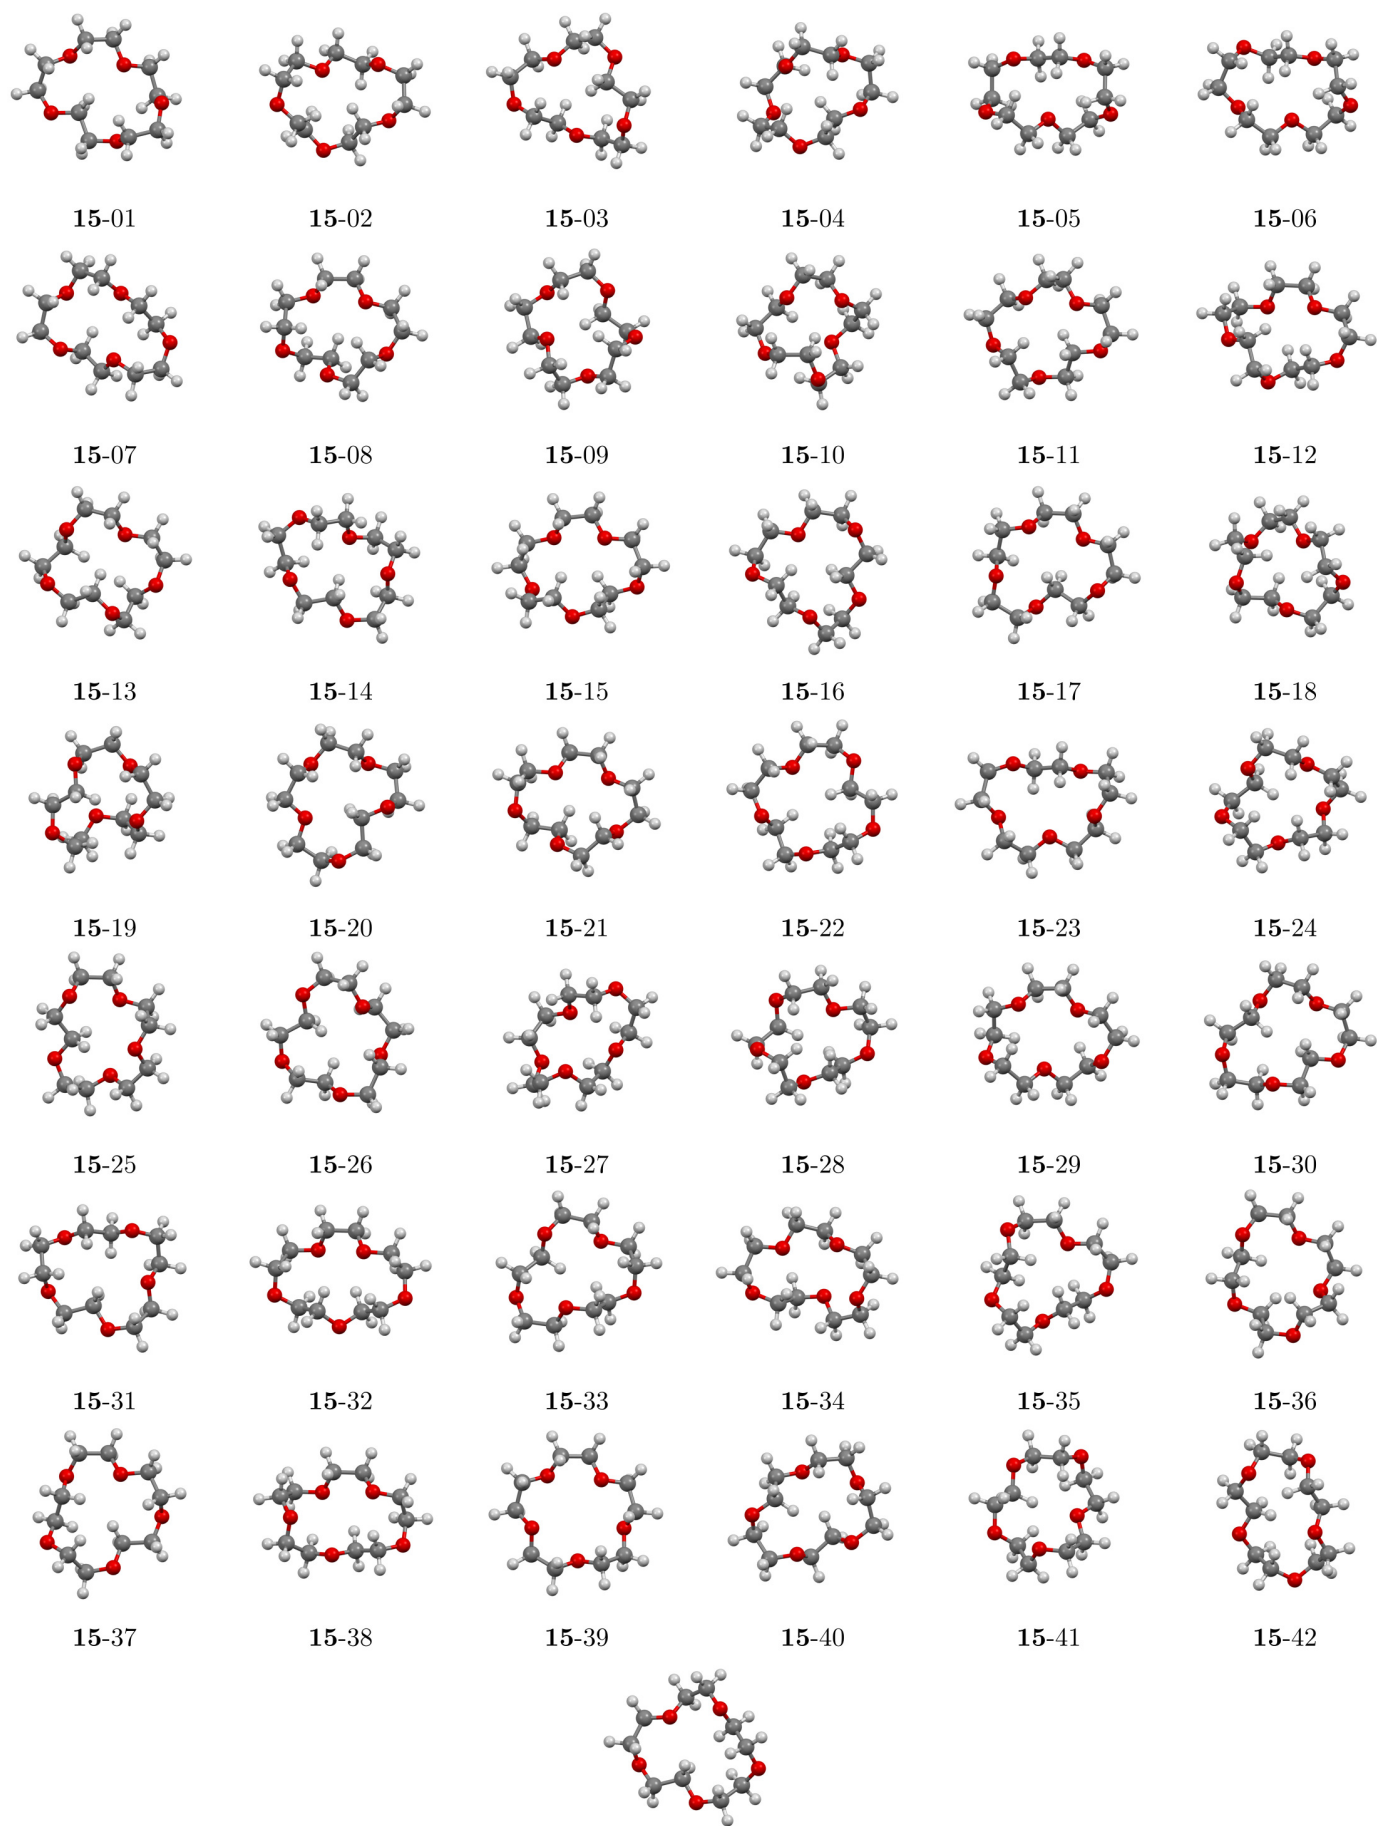

15-43  
S19

Figure S15: Crown 15 conformers optimized at M06-2X/6-31+G(d,p) level.

Table S15: Relative energy  $E$  (in kcal/mol) of crown **15** conformers computed at the M06-2X/6-31+G(d,p) level.

| Conformer | $E$ |
|-----------|-----|-----------|-----|-----------|-----|-----------|-----|-----------|-----|-----------|-----|
| 15-01     | 0.0 | 15-02     | 0.3 | 15-03     | 0.7 | 15-04     | 0.7 | 15-05     | 0.8 | 15-06     | 1.1 |
| 15-07     | 1.2 | 15-08     | 1.3 | 15-09     | 1.3 | 15-10     | 1.6 | 15-11     | 1.6 | 15-12     | 1.8 |
| 15-13     | 2.2 | 15-14     | 2.3 | 15-15     | 2.3 | 15-16     | 2.4 | 15-17     | 2.4 | 15-18     | 2.4 |
| 15-19     | 2.6 | 15-20     | 2.8 | 15-21     | 2.9 | 15-22     | 2.9 | 15-23     | 2.9 | 15-24     | 3.0 |
| 15-25     | 3.1 | 15-26     | 3.1 | 15-27     | 3.2 | 15-28     | 3.2 | 15-29     | 3.5 | 15-30     | 3.6 |
| 15-31     | 3.7 | 15-32     | 3.7 | 15-33     | 3.8 | 15-34     | 3.8 | 15-35     | 4.1 | 15-36     | 4.2 |
| 15-37     | 4.6 | 15-38     | 4.7 | 15-39     | 4.7 | 15-40     | 5.0 | 15-41     | 5.5 | 15-42     | 7.2 |
| 15-43     | 8.0 |           |     |           |     |           |     |           |     |           |     |

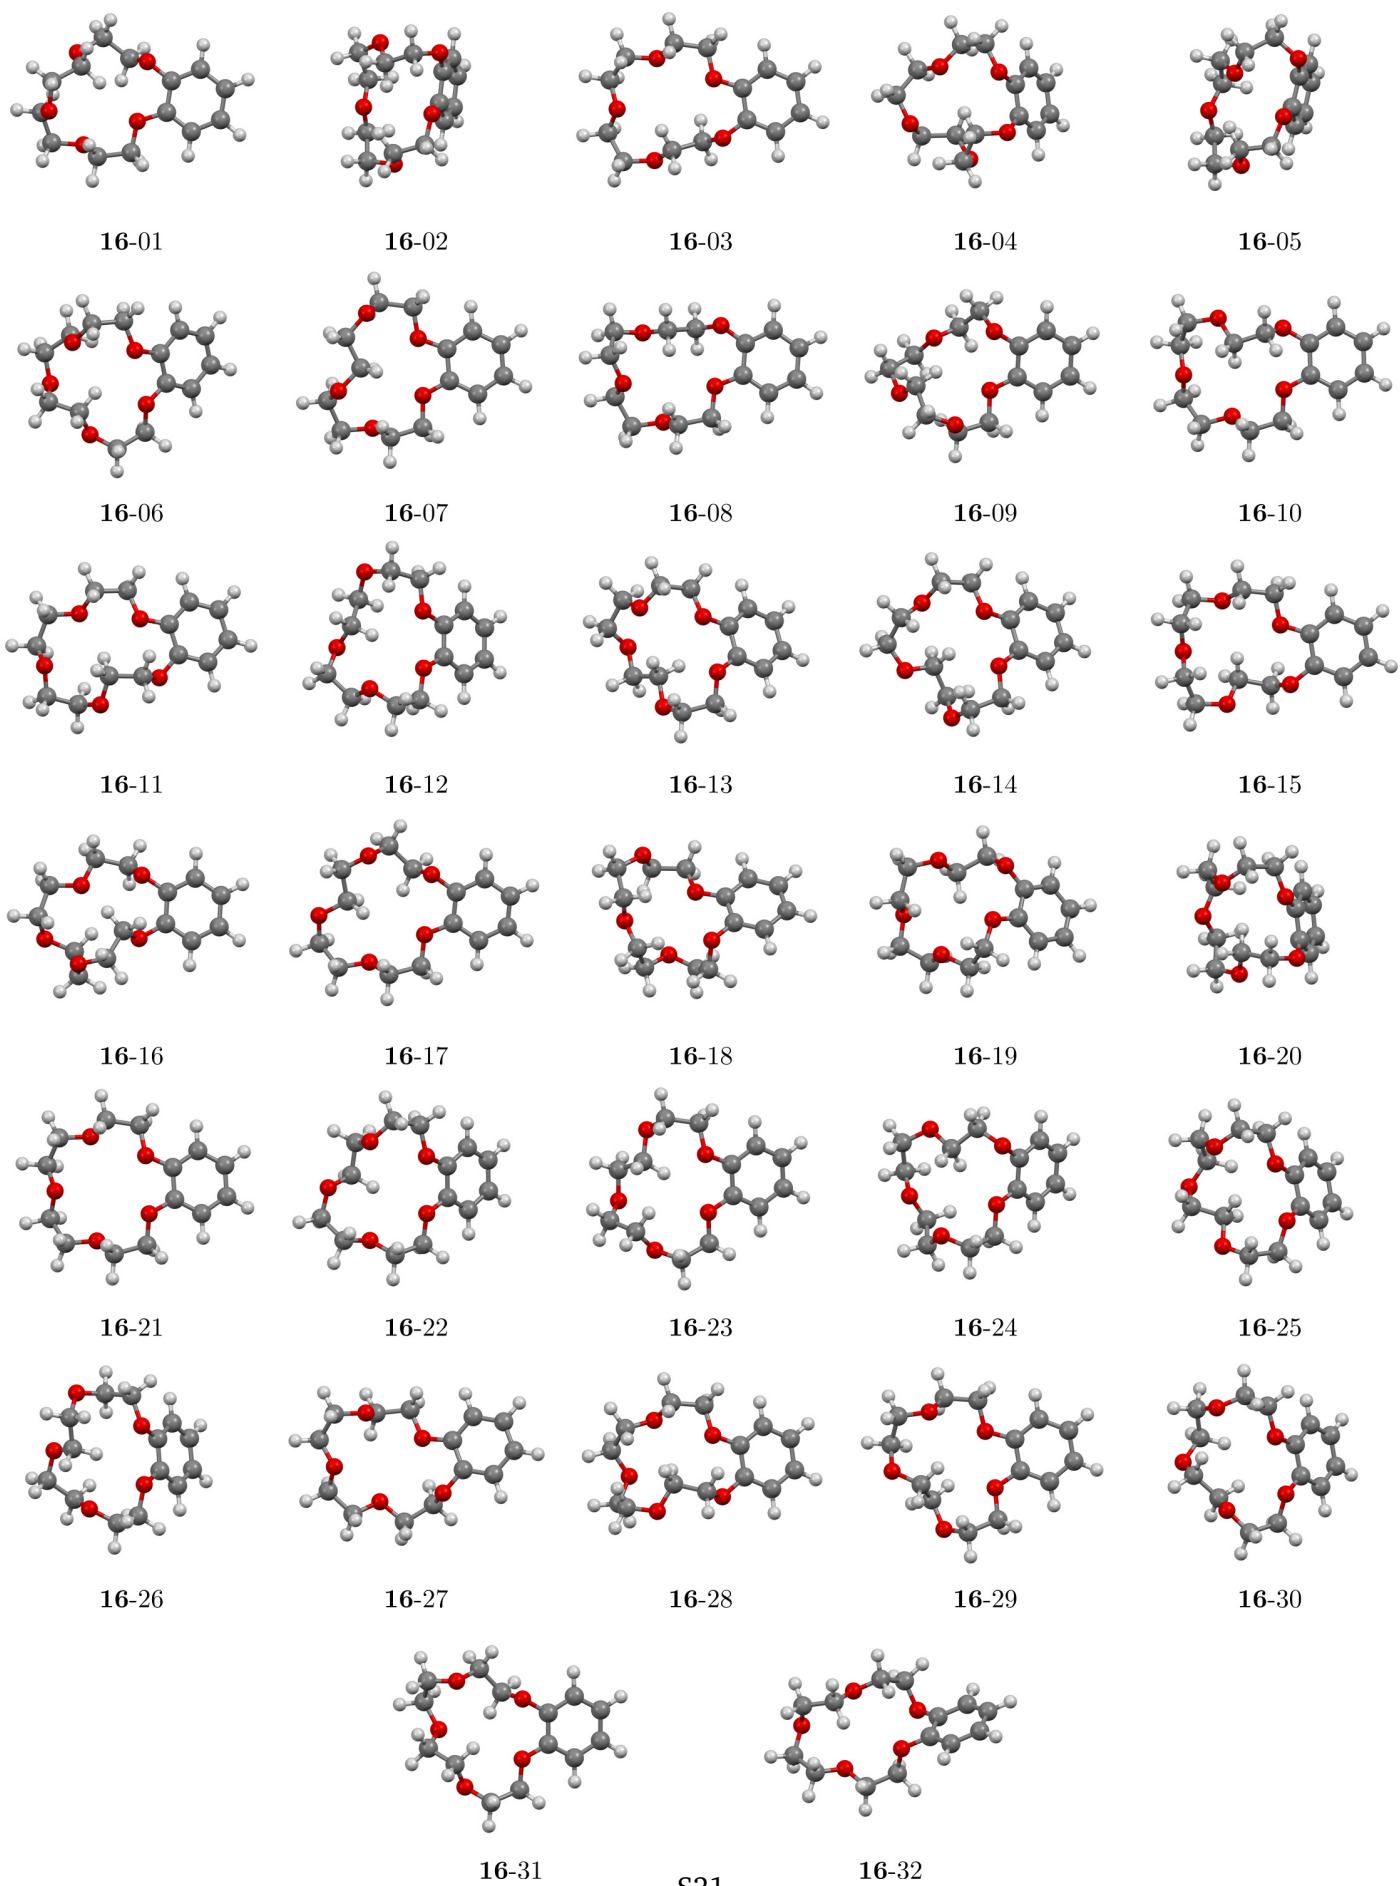

Figure S16: Crown 16 conformers optimized at M06-2X/6-31+G(d,p) level.

Table S16: Relative energy  $E$  (in kcal/mol) of crown **16** conformers computed at the M06-2X/6-31+G(d,p) level.

| Conformer    | $E$ |
|--------------|-----|--------------|-----|--------------|-----|--------------|-----|--------------|-----|--------------|-----|
| <b>16-01</b> | 0.0 | <b>16-02</b> | 1.2 | <b>16-03</b> | 2.1 | <b>16-04</b> | 2.1 | <b>16-05</b> | 2.2 | <b>16-06</b> | 2.3 |
| <b>16-07</b> | 2.4 | <b>16-08</b> | 2.5 | <b>16-09</b> | 2.6 | <b>16-10</b> | 2.8 | <b>16-11</b> | 3.1 | <b>16-12</b> | 3.2 |
| <b>16-13</b> | 3.2 | <b>16-14</b> | 3.7 | <b>16-15</b> | 3.9 | <b>16-16</b> | 4.1 | <b>16-17</b> | 4.2 | <b>16-18</b> | 4.3 |
| <b>16-19</b> | 4.6 | <b>16-20</b> | 4.7 | <b>16-21</b> | 4.8 | <b>16-22</b> | 4.9 | <b>16-23</b> | 4.9 | <b>16-24</b> | 5.2 |
| <b>16-25</b> | 5.2 | <b>16-26</b> | 5.6 | <b>16-27</b> | 5.8 | <b>16-28</b> | 6.0 | <b>16-29</b> | 6.6 | <b>16-30</b> | 6.6 |
| <b>16-31</b> | 7.4 | <b>16-32</b> | 7.6 |              |     |              |     |              |     |              |     |



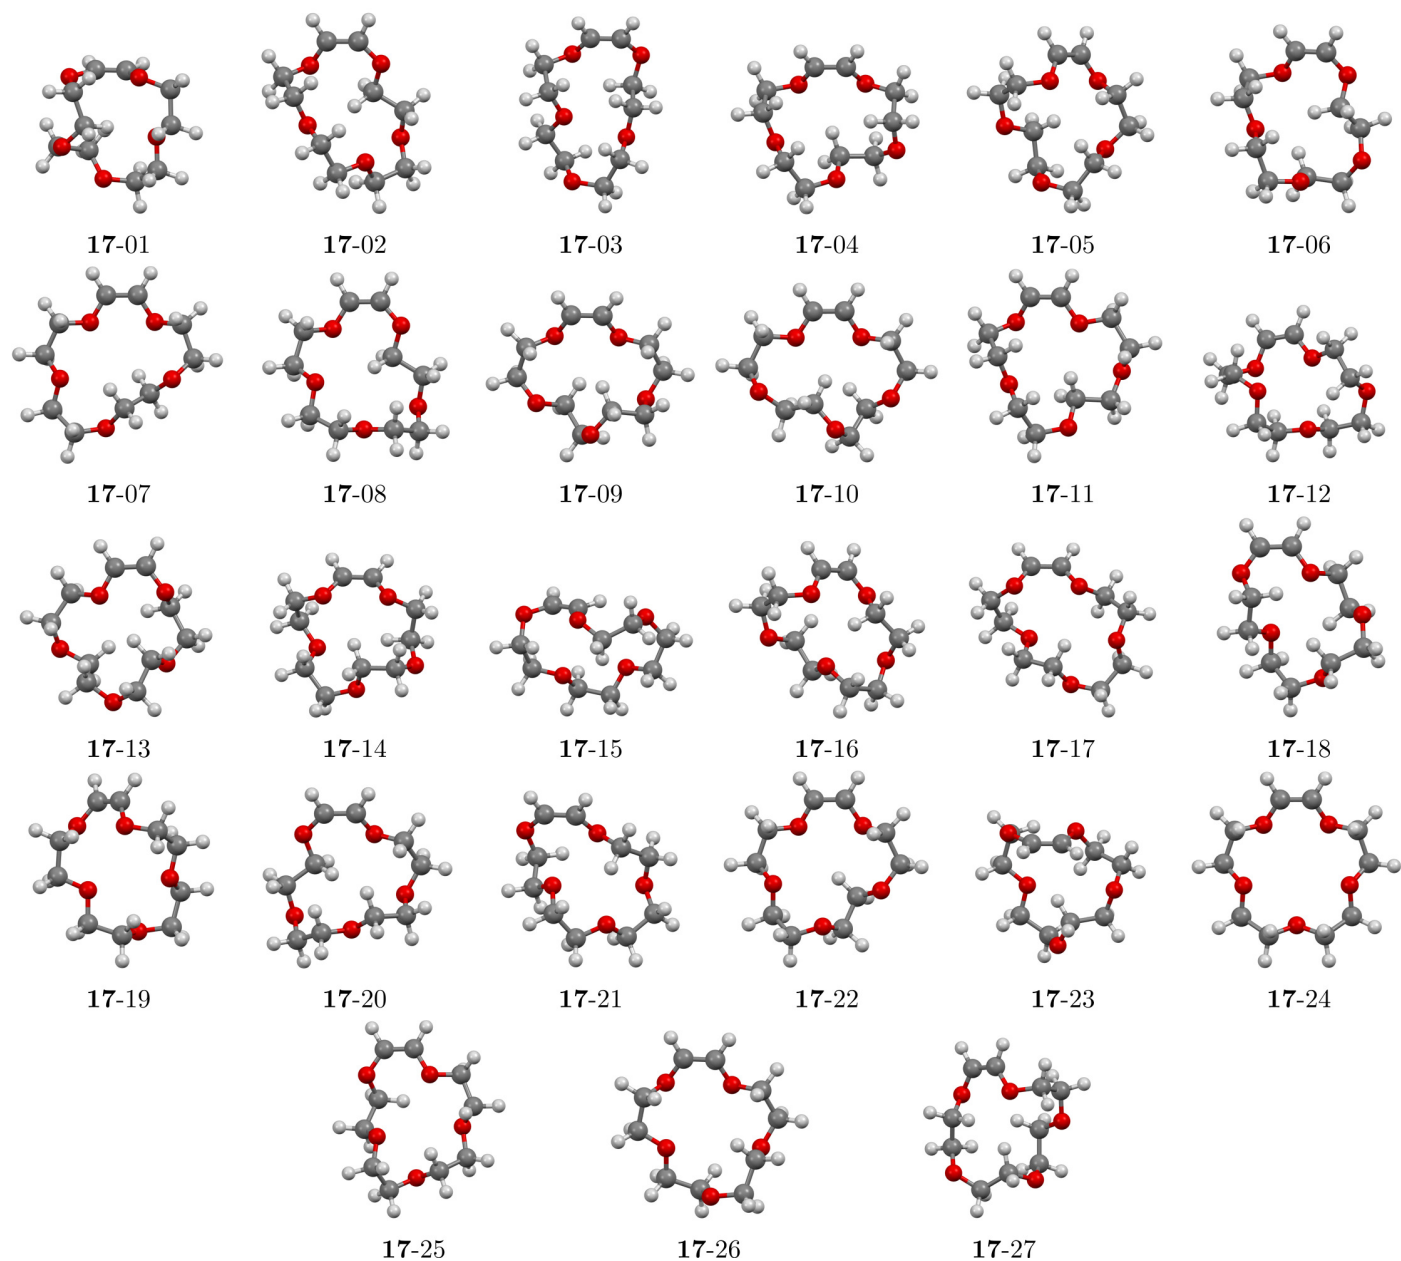

Figure S17: Crown 17 conformers optimized at M06-2X/6-31+G(d,p) level.

Table S17: Relative energy  $E$  (in kcal/mol) of crown 17 conformers computed at the M06-2X/6-31+G(d,p) level.

| Conformer | $E$ |
|-----------|-----|-----------|-----|-----------|-----|-----------|-----|-----------|-----|-----------|-----|
| 17-01     | 0.0 | 17-02     | 0.2 | 17-03     | 0.8 | 17-04     | 1.6 | 17-05     | 1.7 | 17-06     | 2.0 |
| 17-07     | 2.3 | 17-08     | 2.5 | 17-09     | 3.1 | 17-10     | 3.1 | 17-11     | 3.2 | 17-12     | 3.4 |
| 17-13     | 3.5 | 17-14     | 3.9 | 17-15     | 4.0 | 17-16     | 4.4 | 17-17     | 4.5 | 17-18     | 4.8 |
| 17-19     | 4.8 | 17-20     | 4.8 | 17-21     | 4.8 | 17-22     | 4.9 | 17-23     | 5.3 | 17-24     | 5.8 |
| 17-25     | 5.8 | 17-26     | 5.9 | 17-27     | 7.7 |           |     |           |     |           |     |

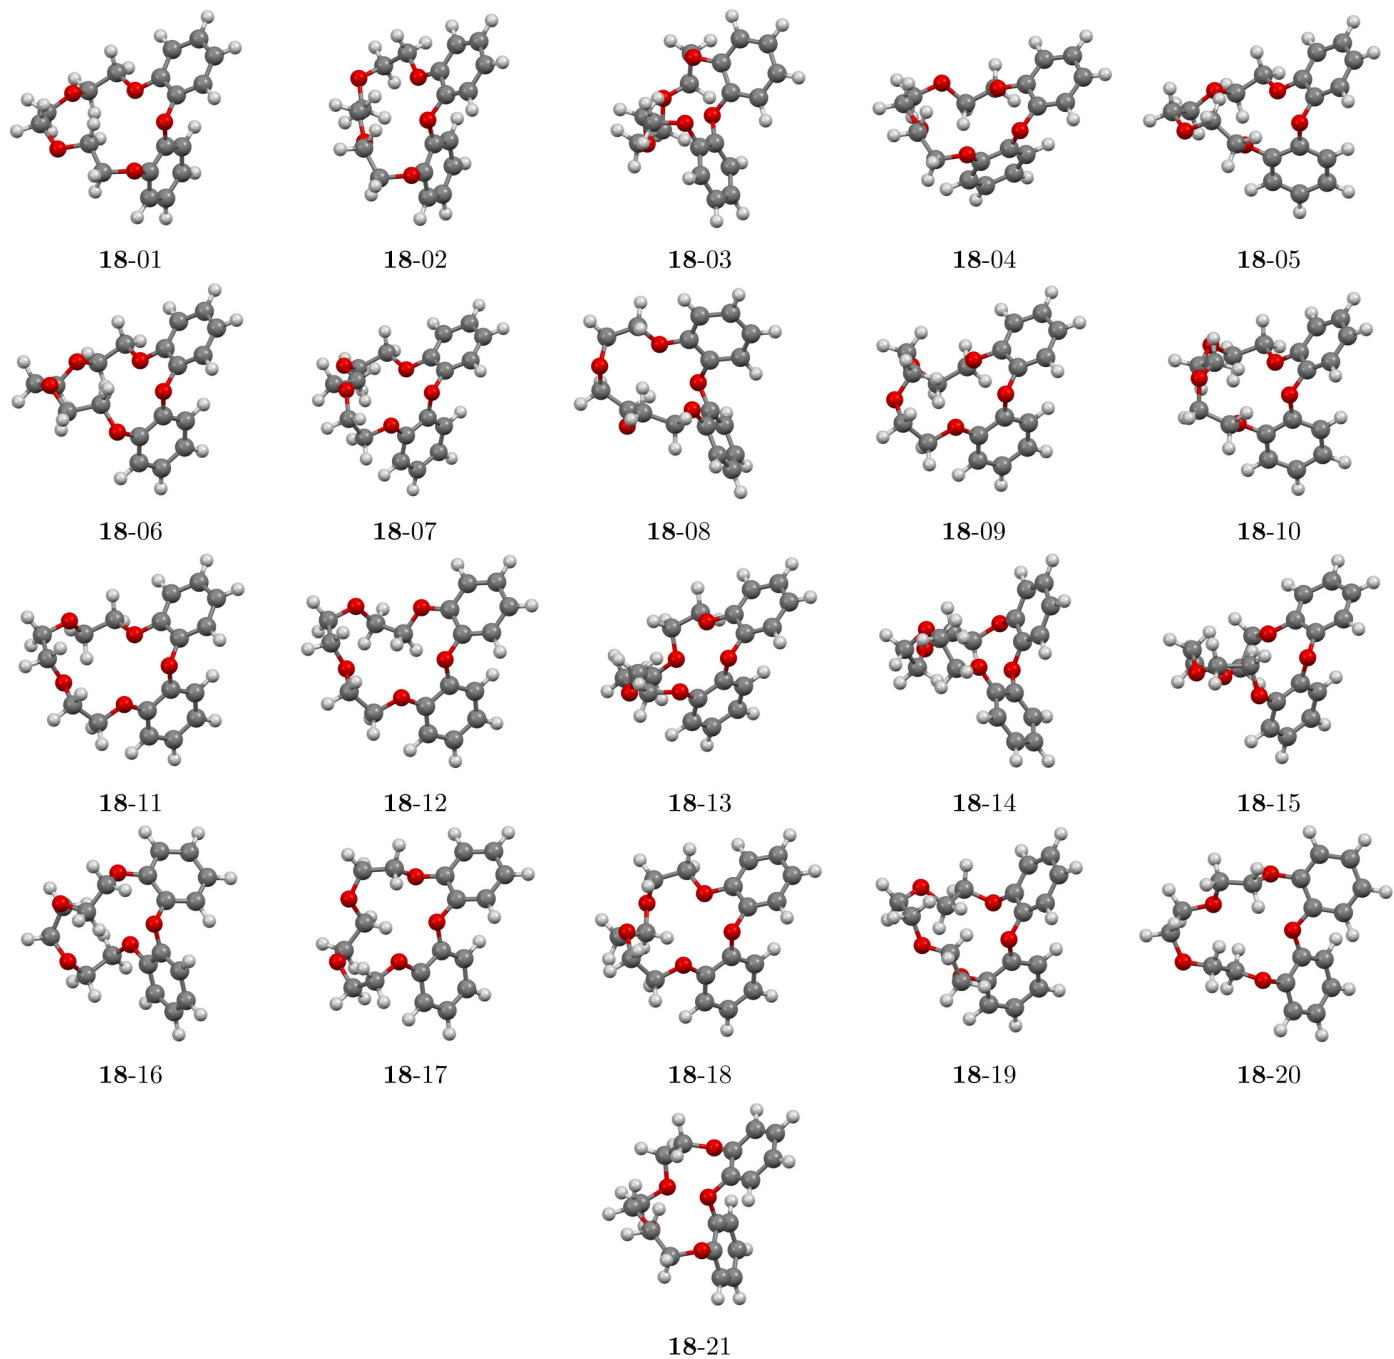

Figure S18: Crown **18** conformers optimized at M06-2X/6-31+G(d,p) level.

Table S18: Relative energy  $E$  (in kcal/mol) of crown **18** conformers computed at the M06-2X/6-31+G(d,p) level.

| Conformer | $E$ |
|-----------|-----|-----------|-----|-----------|-----|-----------|-----|-----------|-----|-----------|-----|
| 18-01     | 0.0 | 18-02     | 0.4 | 18-03     | 0.6 | 18-04     | 0.6 | 18-05     | 0.7 | 18-06     | 0.7 |
| 18-07     | 0.8 | 18-08     | 1.5 | 18-09     | 1.6 | 18-10     | 1.7 | 18-11     | 1.8 | 18-12     | 1.9 |
| 18-13     | 2.7 | 18-14     | 2.7 | 18-15     | 3.2 | 18-16     | 3.2 | 18-17     | 3.7 | 18-18     | 4.0 |
| 18-19     | 4.2 | 18-20     | 4.3 | 18-21     | 4.6 |           |     |           |     |           |     |

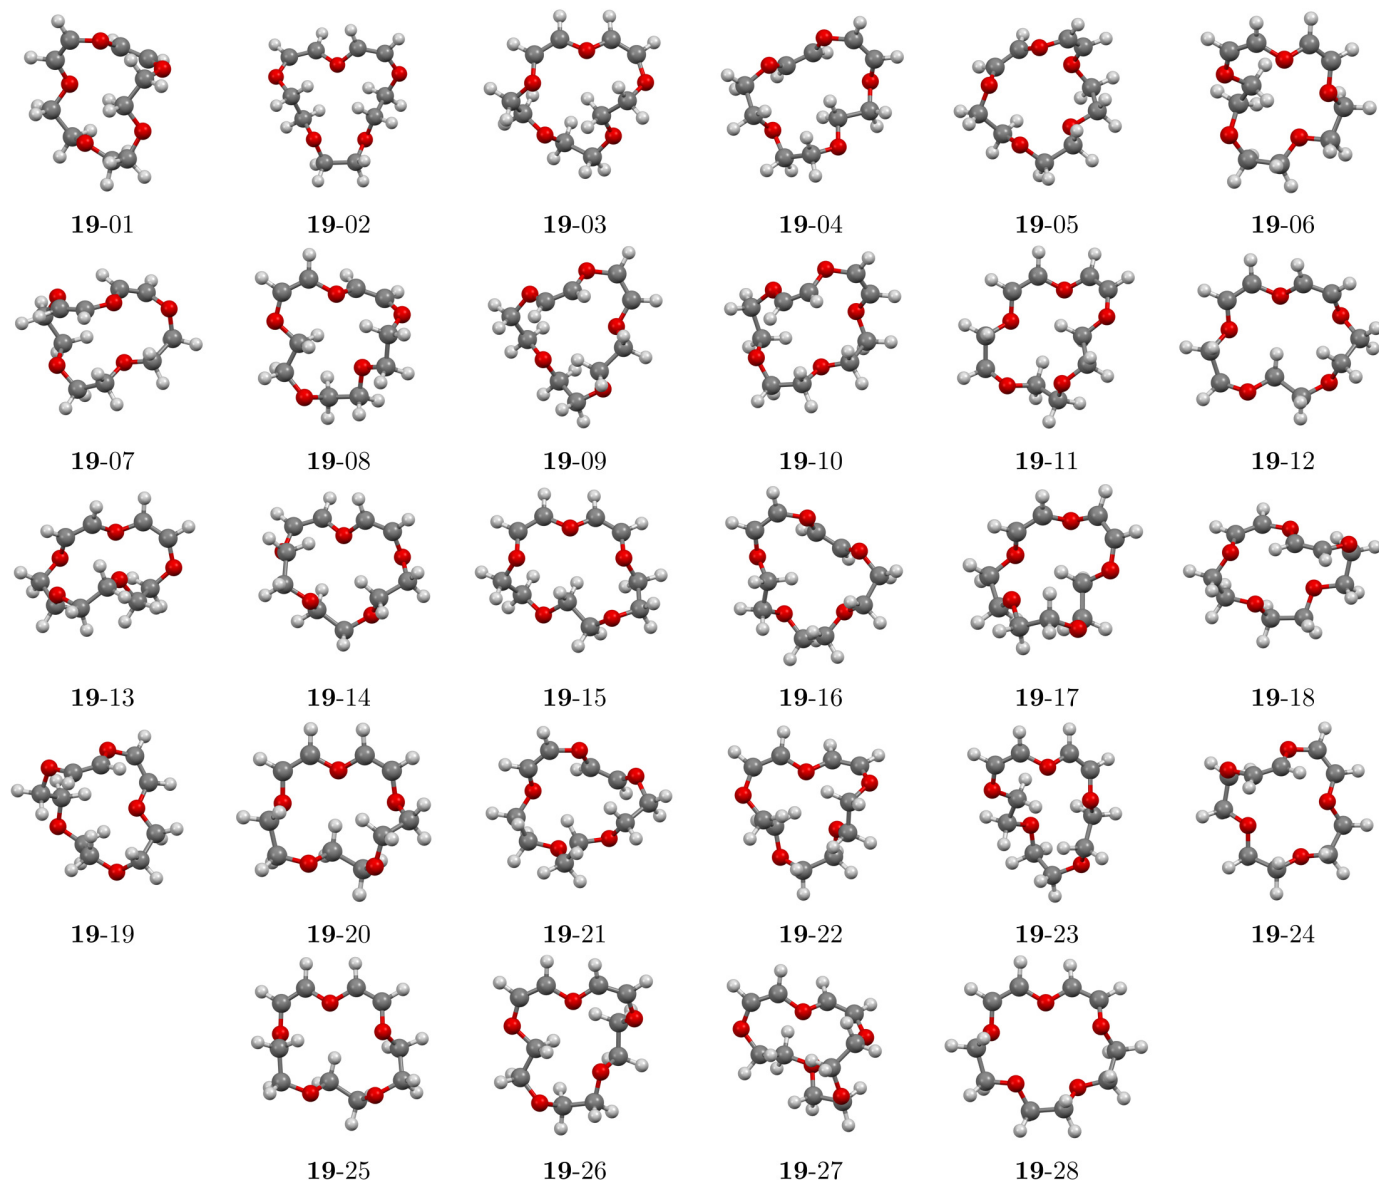

Figure S19: Crown **19** conformers optimized at M06-2X/6-31+G(d,p) level.

Table S19: Relative energy  $E$  (in kcal/mol) of crown **19** conformers computed at the M06-2X/6-31+G(d,p) level.

| Conformer | $E$ |
|-----------|-----|-----------|-----|-----------|-----|-----------|-----|-----------|-----|-----------|-----|
| 19-01     | 0.0 | 19-02     | 0.3 | 19-03     | 0.6 | 19-04     | 0.8 | 19-05     | 1.3 | 19-06     | 1.4 |
| 19-07     | 1.4 | 19-08     | 1.6 | 19-09     | 1.6 | 19-10     | 1.9 | 19-11     | 2.1 | 19-12     | 2.3 |
| 19-13     | 2.4 | 19-14     | 2.4 | 19-15     | 2.4 | 19-16     | 2.7 | 19-17     | 2.7 | 19-18     | 2.8 |
| 19-19     | 2.8 | 19-20     | 3.0 | 19-21     | 3.1 | 19-22     | 3.4 | 19-23     | 3.8 | 19-24     | 4.2 |
| 19-25     | 4.5 | 19-26     | 4.5 | 19-27     | 4.7 | 19-28     | 6.2 |           |     |           |     |

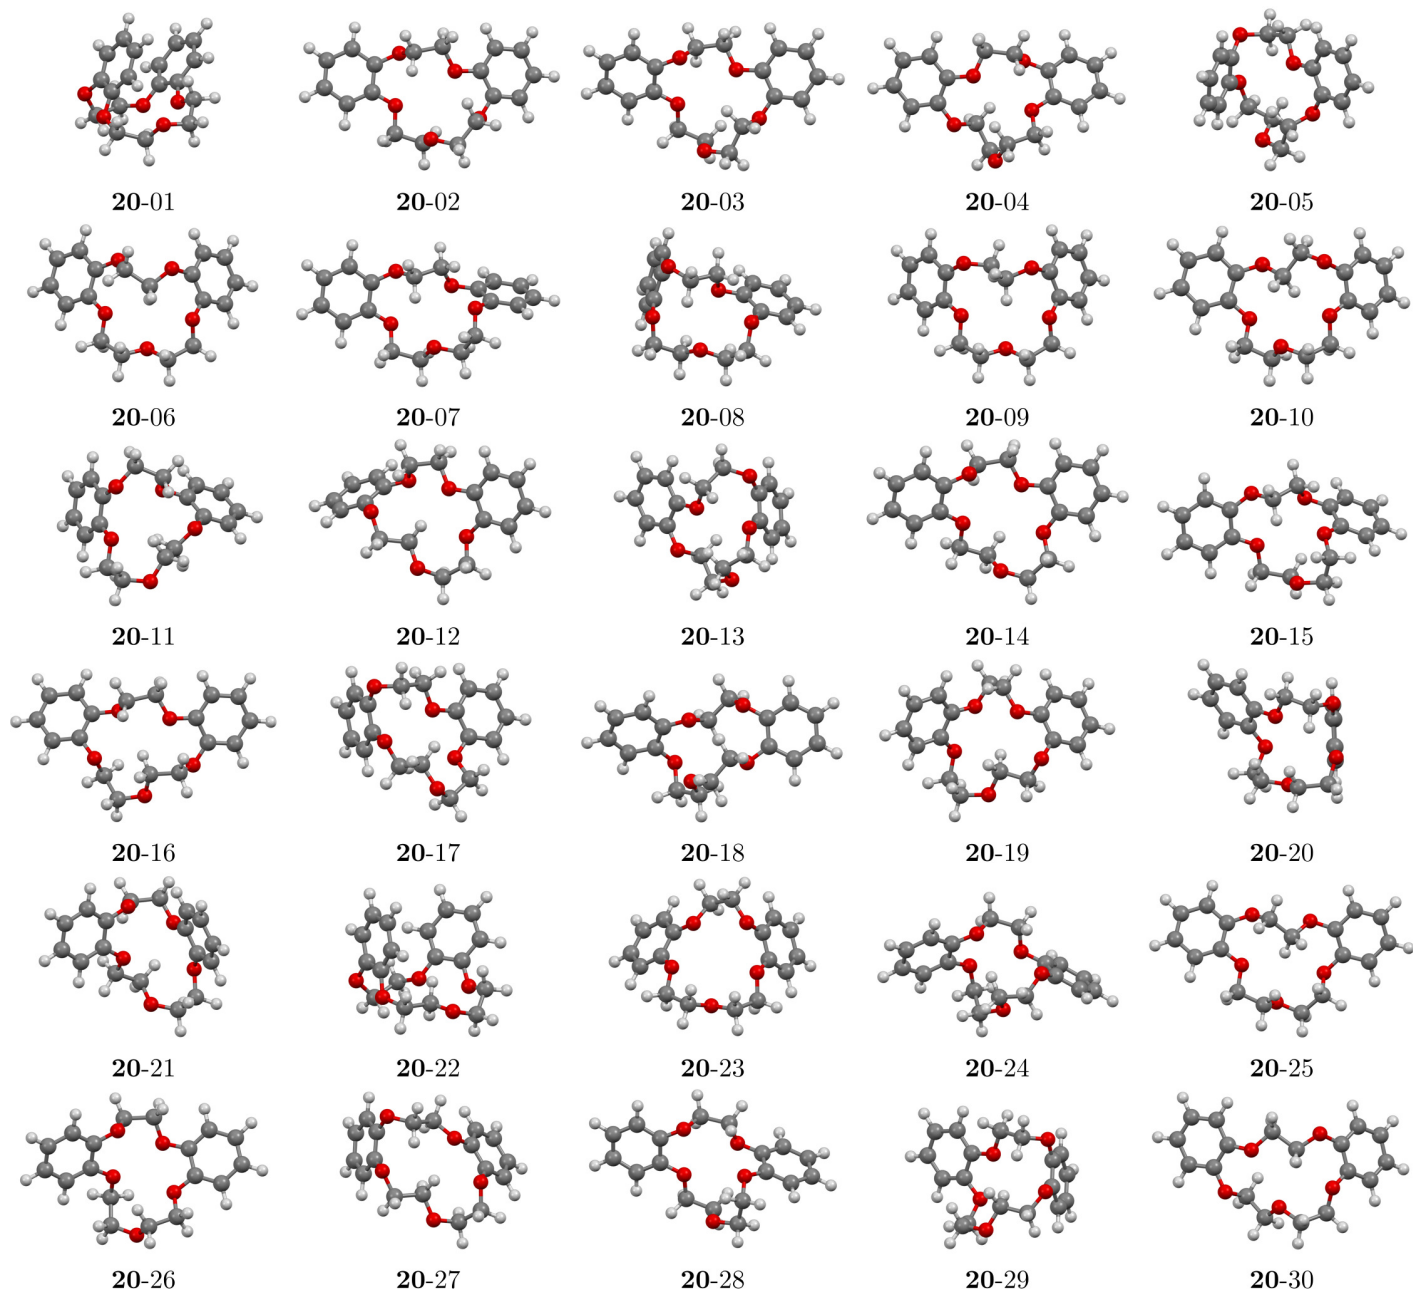

Figure S20: Crown **20** conformers optimized at M06-2X/6-31+G(d,p) level.

Table S20: Relative energy  $E$  (in kcal/mol) of crown **20** conformers computed at the M06-2X/6-31+G(d,p) level.

| Conformer | $E$ |
|-----------|-----|-----------|-----|-----------|-----|-----------|-----|-----------|-----|-----------|-----|
| 20-01     | 0.0 | 20-02     | 0.8 | 20-03     | 1.2 | 20-04     | 1.5 | 20-05     | 1.9 | 20-06     | 2.0 |
| 20-07     | 2.0 | 20-08     | 2.2 | 20-09     | 2.2 | 20-10     | 2.3 | 20-11     | 2.5 | 20-12     | 2.7 |
| 20-13     | 2.8 | 20-14     | 2.8 | 20-15     | 3.1 | 20-16     | 3.2 | 20-17     | 3.3 | 20-18     | 3.4 |
| 20-19     | 3.6 | 20-20     | 3.8 | 20-21     | 3.8 | 20-22     | 3.8 | 20-23     | 3.9 | 20-24     | 3.9 |
| 20-25     | 4.3 | 20-26     | 4.4 | 20-27     | 4.6 | 20-28     | 5.1 | 20-29     | 5.7 | 20-30     | 6.9 |



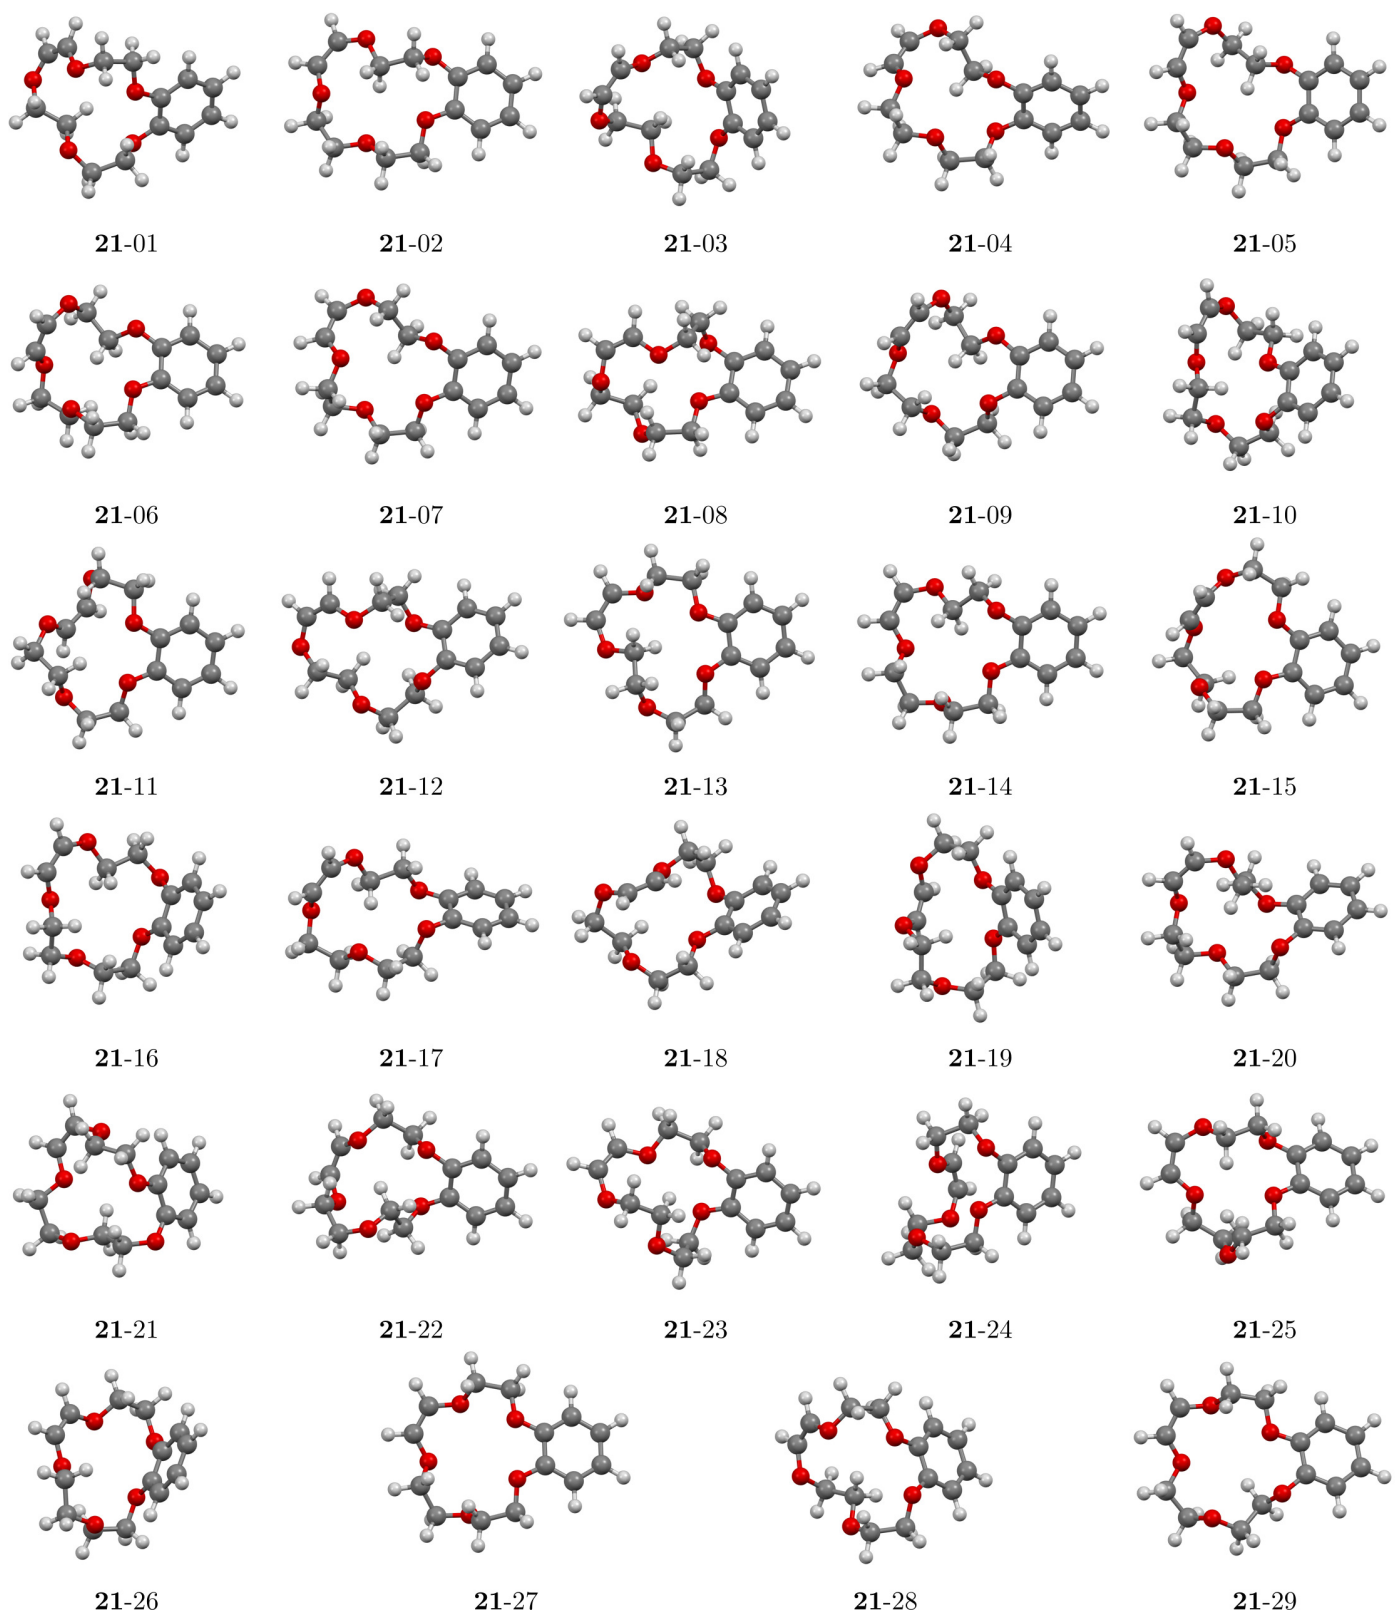

Figure S21: Crown **21** conformers optimized at M06-2X/6-31+G(d,p) level.

Table S21: Relative energy  $E$  (in kcal/mol) of crown **21** conformers computed at the M06-2X/6-31+G(d,p) level.

| Conformer | $E$ |
|-----------|-----|-----------|-----|-----------|-----|-----------|-----|-----------|-----|-----------|-----|
| 21-01     | 0.0 | 21-02     | 0.8 | 21-03     | 0.8 | 21-04     | 1.2 | 21-05     | 1.3 | 21-06     | 1.3 |
| 21-07     | 1.5 | 21-08     | 1.5 | 21-09     | 1.9 | 21-10     | 1.9 | 21-11     | 2.0 | 21-12     | 2.2 |
| 21-13     | 2.4 | 21-14     | 2.7 | 21-15     | 2.7 | 21-16     | 2.8 | 21-17     | 2.9 | 21-18     | 3.1 |
| 21-19     | 3.3 | 21-20     | 3.4 | 21-21     | 3.6 | 21-22     | 3.7 | 21-23     | 3.8 | 21-24     | 3.9 |
| 21-25     | 4.0 | 21-26     | 4.7 | 21-27     | 4.8 | 21-28     | 5.0 | 21-29     | 5.6 |           |     |



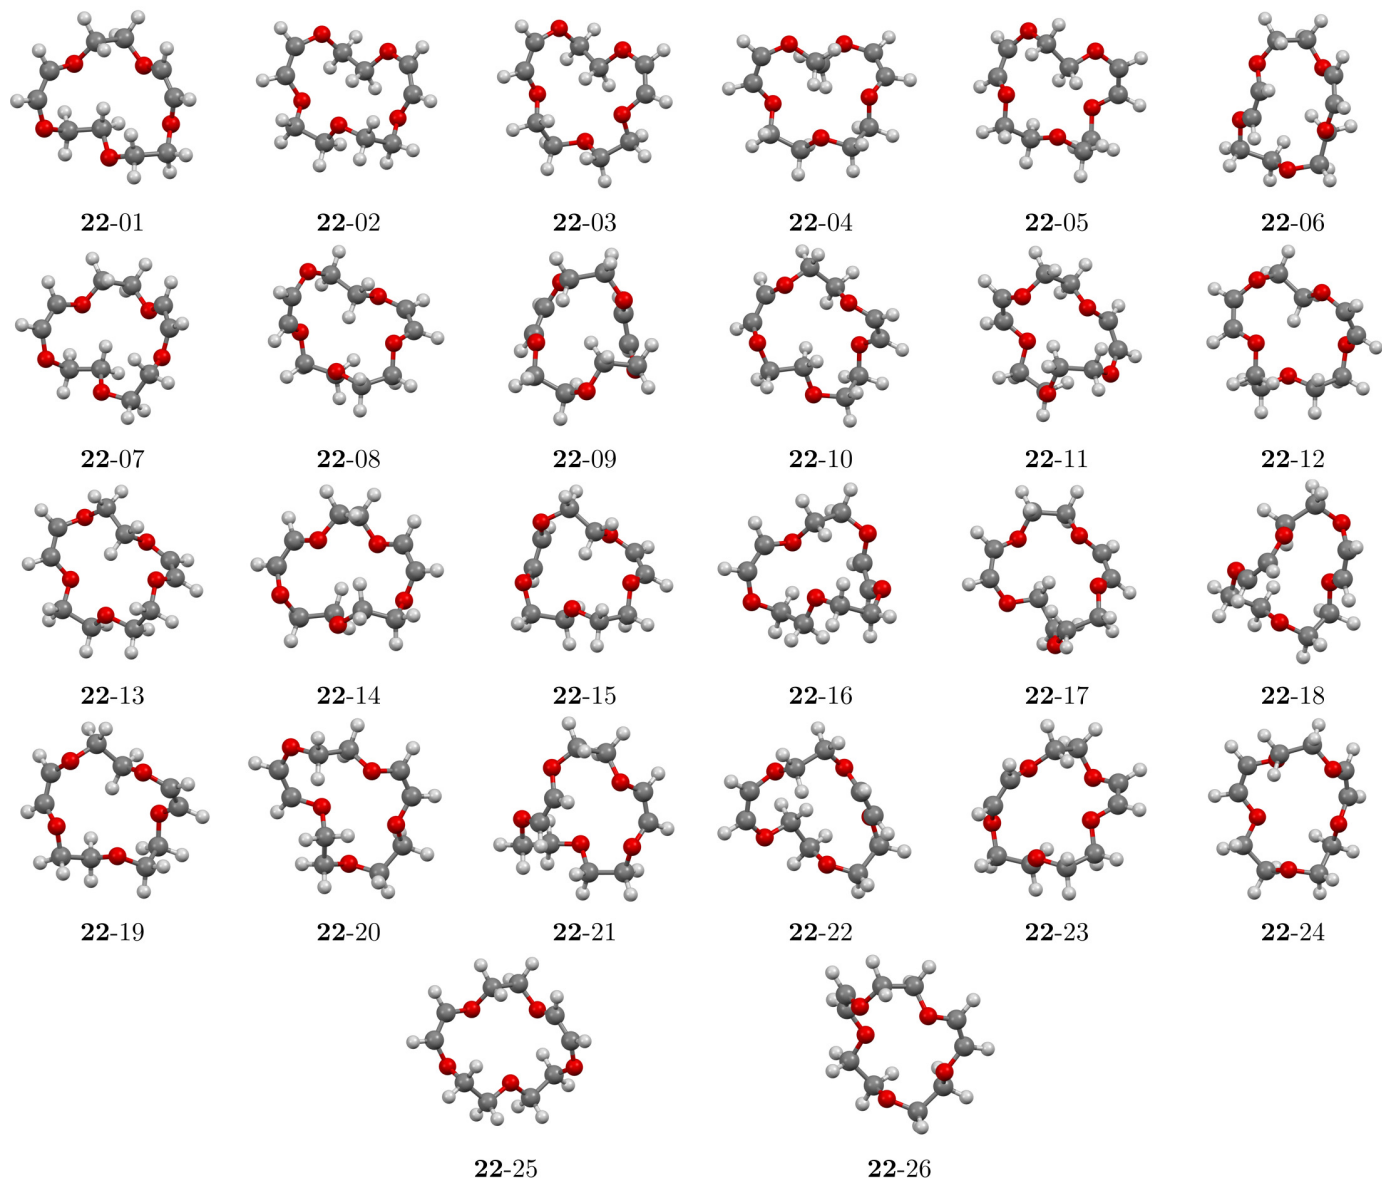

Figure S22: Crown **22** conformers optimized at M06-2X/6-31+G(d,p) level.

Table S22: Relative energy  $E$  (in kcal/mol) of crown **22** conformers computed at the M06-2X/6-31+G(d,p) level.

| Conformer | $E$ |
|-----------|-----|-----------|-----|-----------|-----|-----------|-----|-----------|-----|-----------|-----|
| 22-01     | 0.0 | 22-02     | 0.3 | 22-03     | 0.7 | 22-04     | 1.1 | 22-05     | 1.3 | 22-06     | 1.5 |
| 22-07     | 1.8 | 22-08     | 1.9 | 22-09     | 2.5 | 22-10     | 2.8 | 22-11     | 2.9 | 22-12     | 2.9 |
| 22-13     | 3.1 | 22-14     | 3.6 | 22-15     | 4.0 | 22-16     | 4.3 | 22-17     | 4.6 | 22-18     | 4.7 |
| 22-19     | 5.2 | 22-20     | 5.4 | 22-21     | 5.5 | 22-22     | 5.6 | 22-23     | 6.2 | 22-24     | 6.9 |
| 22-25     | 7.1 | 22-26     | 8.2 |           |     |           |     |           |     |           |     |

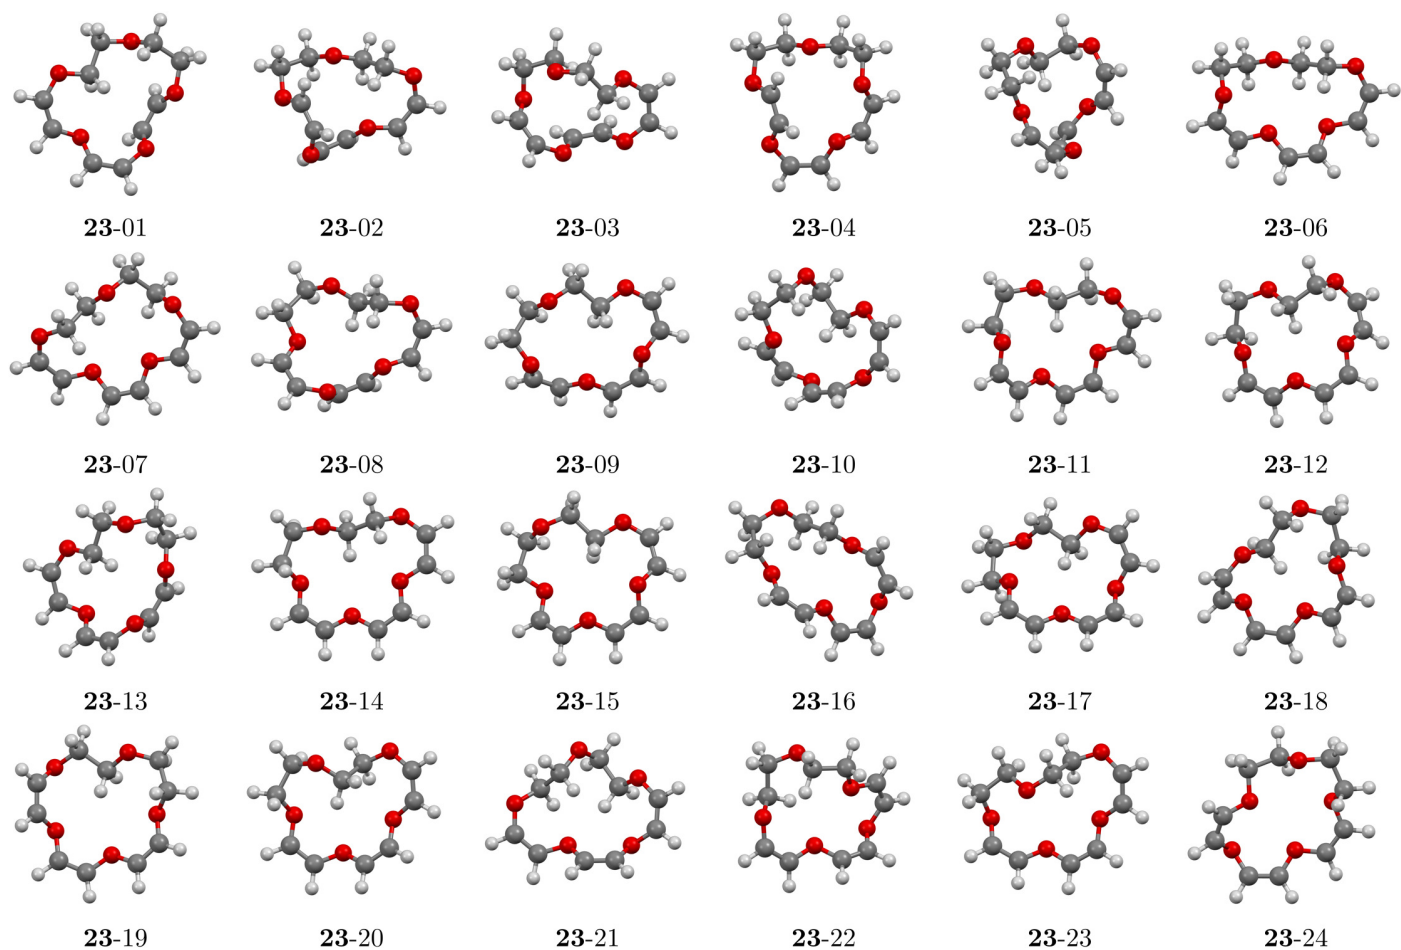

Figure S23: Crown 23 conformers optimized at M06-2X/6-31+G(d,p) level.

Table S23: Relative energy  $E$  (in kcal/mol) of crown 23 conformers computed at the M06-2X/6-31+G(d,p) level.

| Conformer | $E$ |
|-----------|-----|-----------|-----|-----------|-----|-----------|-----|-----------|-----|-----------|-----|
| 23-01     | 0.0 | 23-02     | 0.2 | 23-03     | 1.1 | 23-04     | 1.2 | 23-05     | 1.2 | 23-06     | 1.2 |
| 23-07     | 1.7 | 23-08     | 1.9 | 23-09     | 2.0 | 23-10     | 2.1 | 23-11     | 2.1 | 23-12     | 2.2 |
| 23-13     | 2.4 | 23-14     | 2.4 | 23-15     | 2.6 | 23-16     | 2.8 | 23-17     | 2.9 | 23-18     | 3.1 |
| 23-19     | 3.1 | 23-20     | 3.7 | 23-21     | 4.0 | 23-22     | 4.3 | 23-23     | 4.5 | 23-24     | 5.9 |

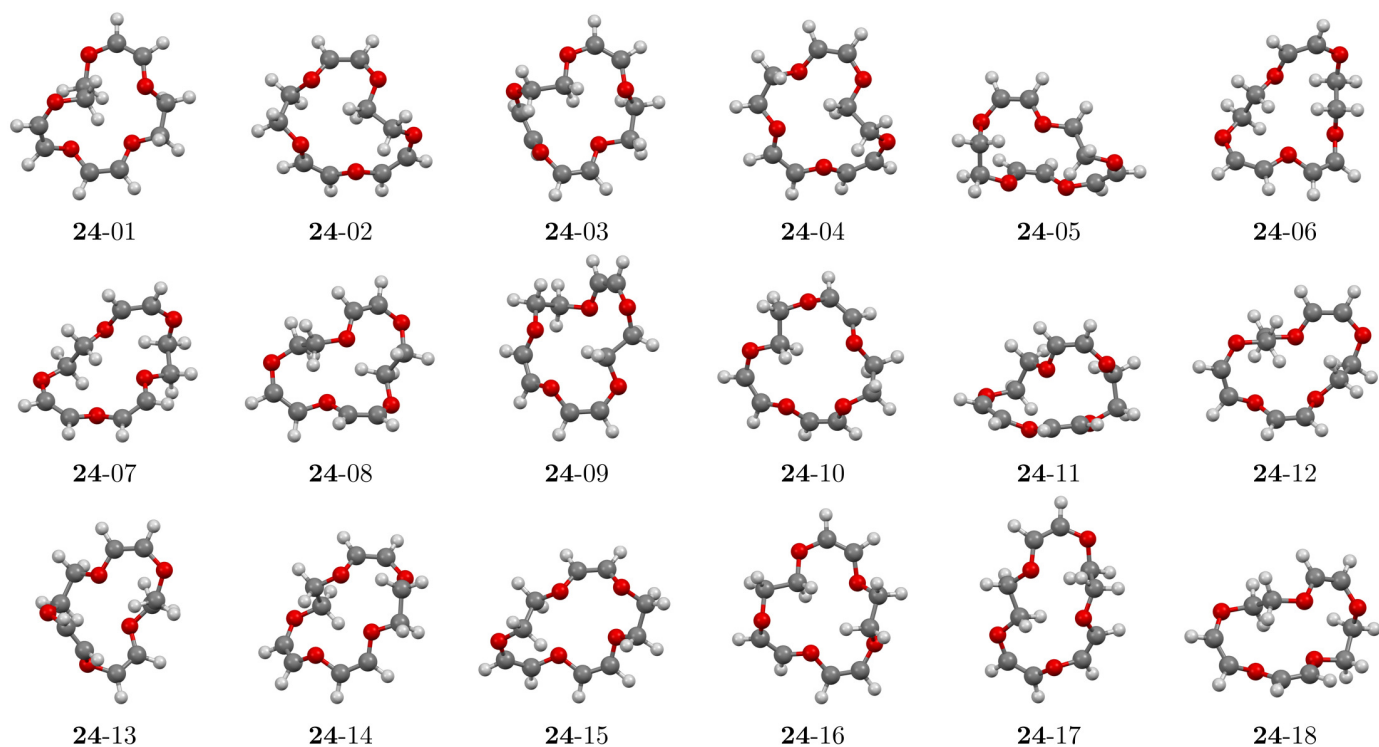

Figure S24: Crown **24** conformers optimized at M06-2X/6-31+G(d,p) level.

Table S24: Relative energy  $E$  (in kcal/mol) of crown **24** conformers computed at the M06-2X/6-31+G(d,p) level.

| Conformer | $E$ |
|-----------|-----|-----------|-----|-----------|-----|-----------|-----|-----------|-----|-----------|-----|
| 24-01     | 0.0 | 24-02     | 0.2 | 24-03     | 1.3 | 24-04     | 1.3 | 24-05     | 1.4 | 24-06     | 1.5 |
| 24-07     | 1.6 | 24-08     | 2.5 | 24-09     | 2.6 | 24-10     | 2.6 | 24-11     | 3.0 | 24-12     | 3.0 |
| 24-13     | 3.6 | 24-14     | 3.6 | 24-15     | 4.0 | 24-16     | 4.7 | 24-17     | 5.2 | 24-18     | 5.2 |

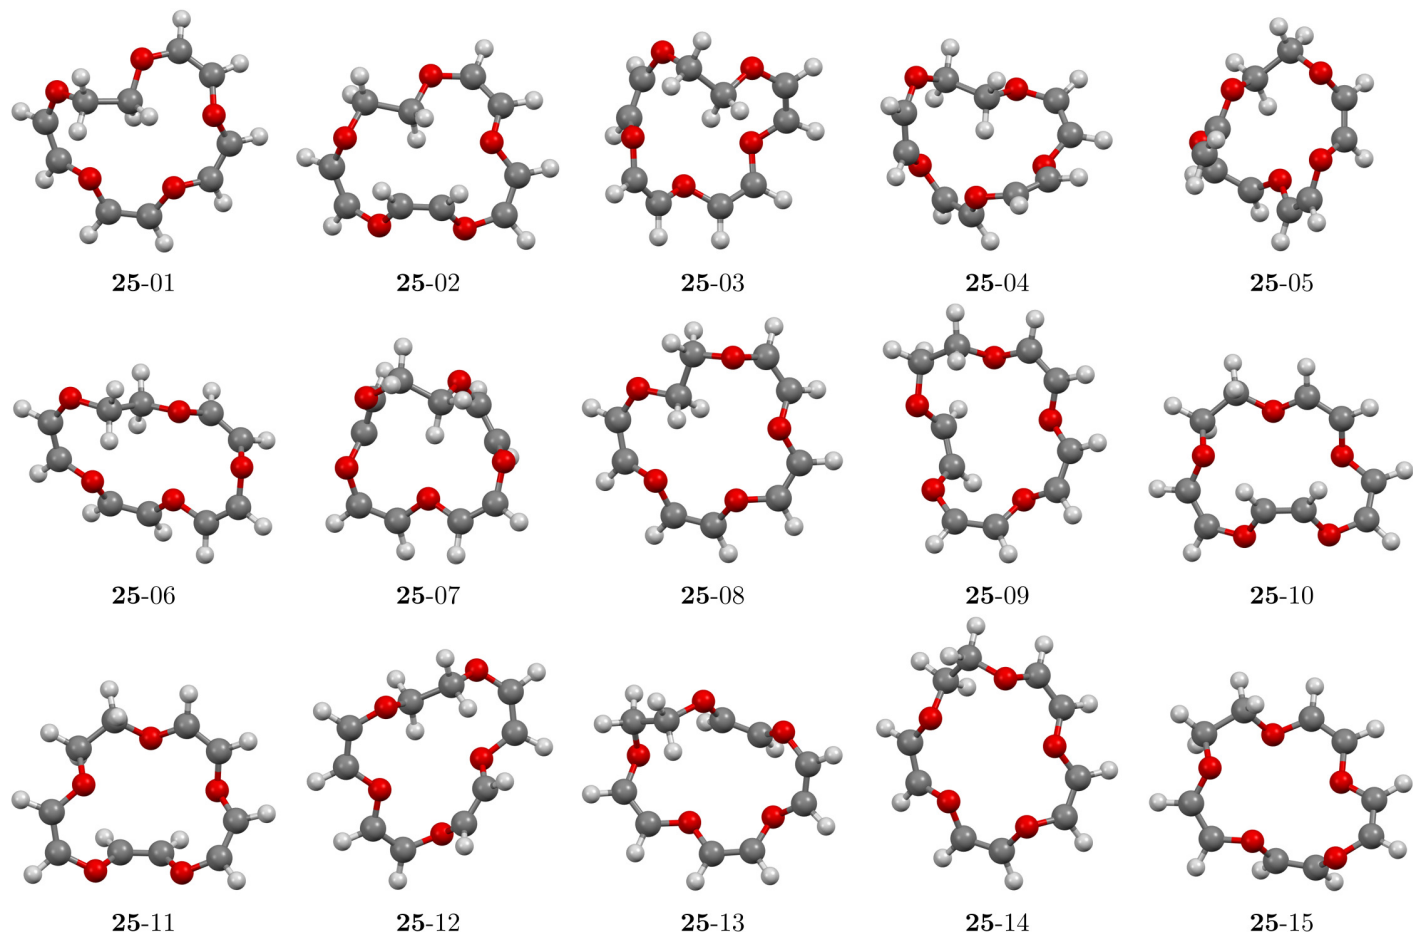

Figure S25: Crown 25 conformers optimized at M06-2X/6-31+G(d,p) level.

Table S25: Relative energy  $E$  (in kcal/mol) of crown 25 conformers computed at the M06-2X/6-31+G(d,p) level.

| Conformer | $E$ |
|-----------|-----|-----------|-----|-----------|-----|-----------|-----|-----------|-----|-----------|-----|
| 25-01     | 0.0 | 25-02     | 0.2 | 25-03     | 0.8 | 25-04     | 1.2 | 25-05     | 1.5 | 25-06     | 1.6 |
| 25-07     | 1.8 | 25-08     | 1.9 | 25-09     | 2.0 | 25-10     | 2.6 | 25-11     | 2.6 | 25-12     | 2.8 |
| 25-13     | 3.6 | 25-14     | 5.5 | 25-15     | 5.9 |           |     |           |     |           |     |

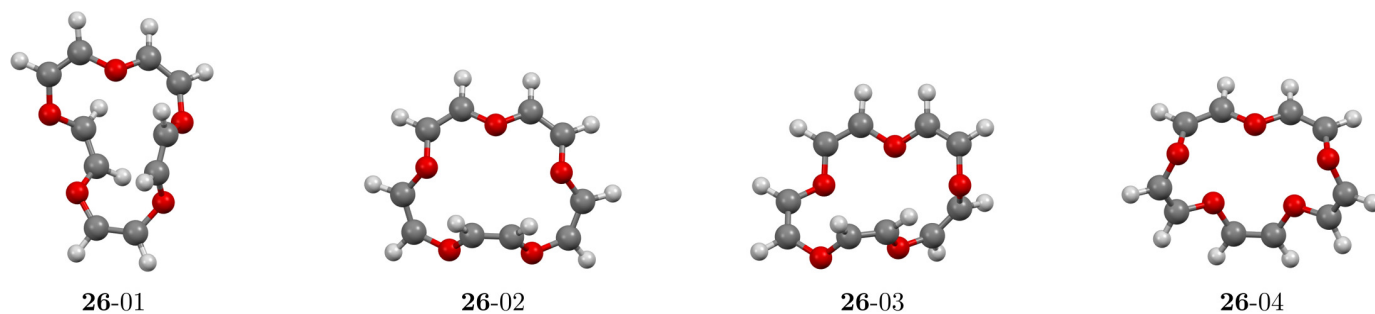

Figure S26: Crown **26** conformers optimized at M06-2X/6-31+G(d,p) level.

Table S26: Relative energy  $E$  (in kcal/mol) of crown **26** conformers computed at the M06-2X/6-31+G(d,p) level.

|           |     |           |     |           |     |           |     |
|-----------|-----|-----------|-----|-----------|-----|-----------|-----|
| Conformer | $E$ | Conformer | $E$ | Conformer | $E$ | Conformer | $E$ |
| 26-01     | 0.0 | 26-02     | 2.7 | 26-03     | 3.7 | 26-04     | 6.0 |

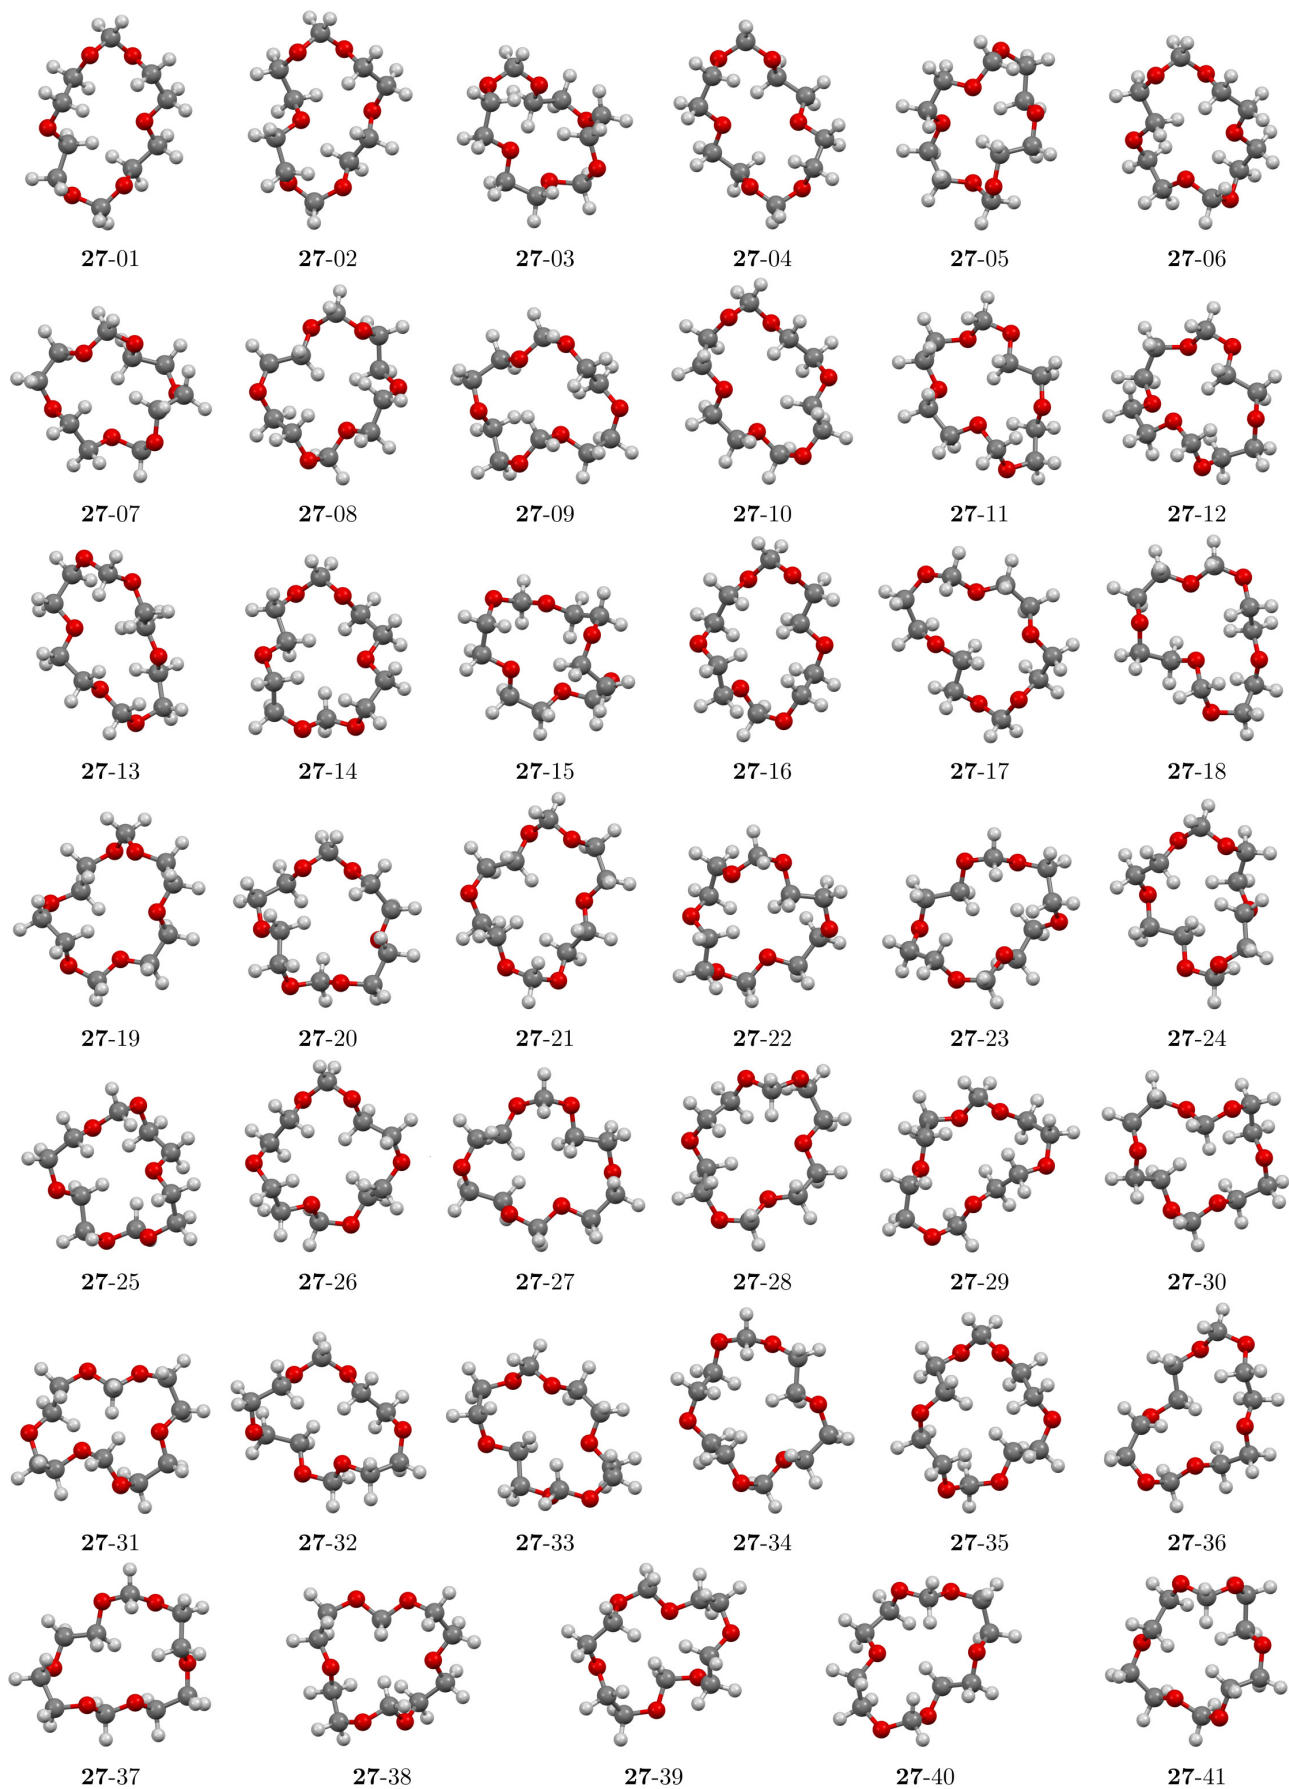

Figure S27: Crown 27 conformers optimized at M06-2X/6-31+G(d,p) level.



Table S27: Relative energy  $E$  (in kcal/mol) of crown **27** conformers computed at the M06-2X/6-31+G(d,p) level.

| Conformer | $E$ | Conformer | $E$ | Conformer | $E$  | Conformer | $E$  | Conformer | $E$  | Conformer | $E$ |
|-----------|-----|-----------|-----|-----------|------|-----------|------|-----------|------|-----------|-----|
| 27-01     | 0.0 | 27-02     | 0.1 | 27-03     | 0.3  | 27-04     | 0.4  | 27-05     | 1.3  | 27-06     | 2.4 |
| 27-07     | 2.8 | 27-08     | 3.5 | 27-09     | 3.8  | 27-10     | 3.9  | 27-11     | 4.2  | 27-12     | 4.4 |
| 27-13     | 4.5 | 27-14     | 4.8 | 27-15     | 4.8  | 27-16     | 5.1  | 27-17     | 5.1  | 27-18     | 5.2 |
| 27-19     | 5.5 | 27-20     | 6.1 | 27-21     | 6.6  | 27-22     | 6.6  | 27-23     | 6.6  | 27-24     | 6.7 |
| 27-25     | 6.7 | 27-26     | 6.8 | 27-27     | 6.9  | 27-28     | 7.4  | 27-29     | 7.5  | 27-30     | 7.6 |
| 27-31     | 7.9 | 27-32     | 8.0 | 27-33     | 8.2  | 27-34     | 8.4  | 27-35     | 8.9  | 27-36     | 9.3 |
| 27-37     | 9.5 | 27-38     | 9.7 | 27-39     | 10.1 | 27-40     | 10.3 | 27-41     | 11.0 |           |     |

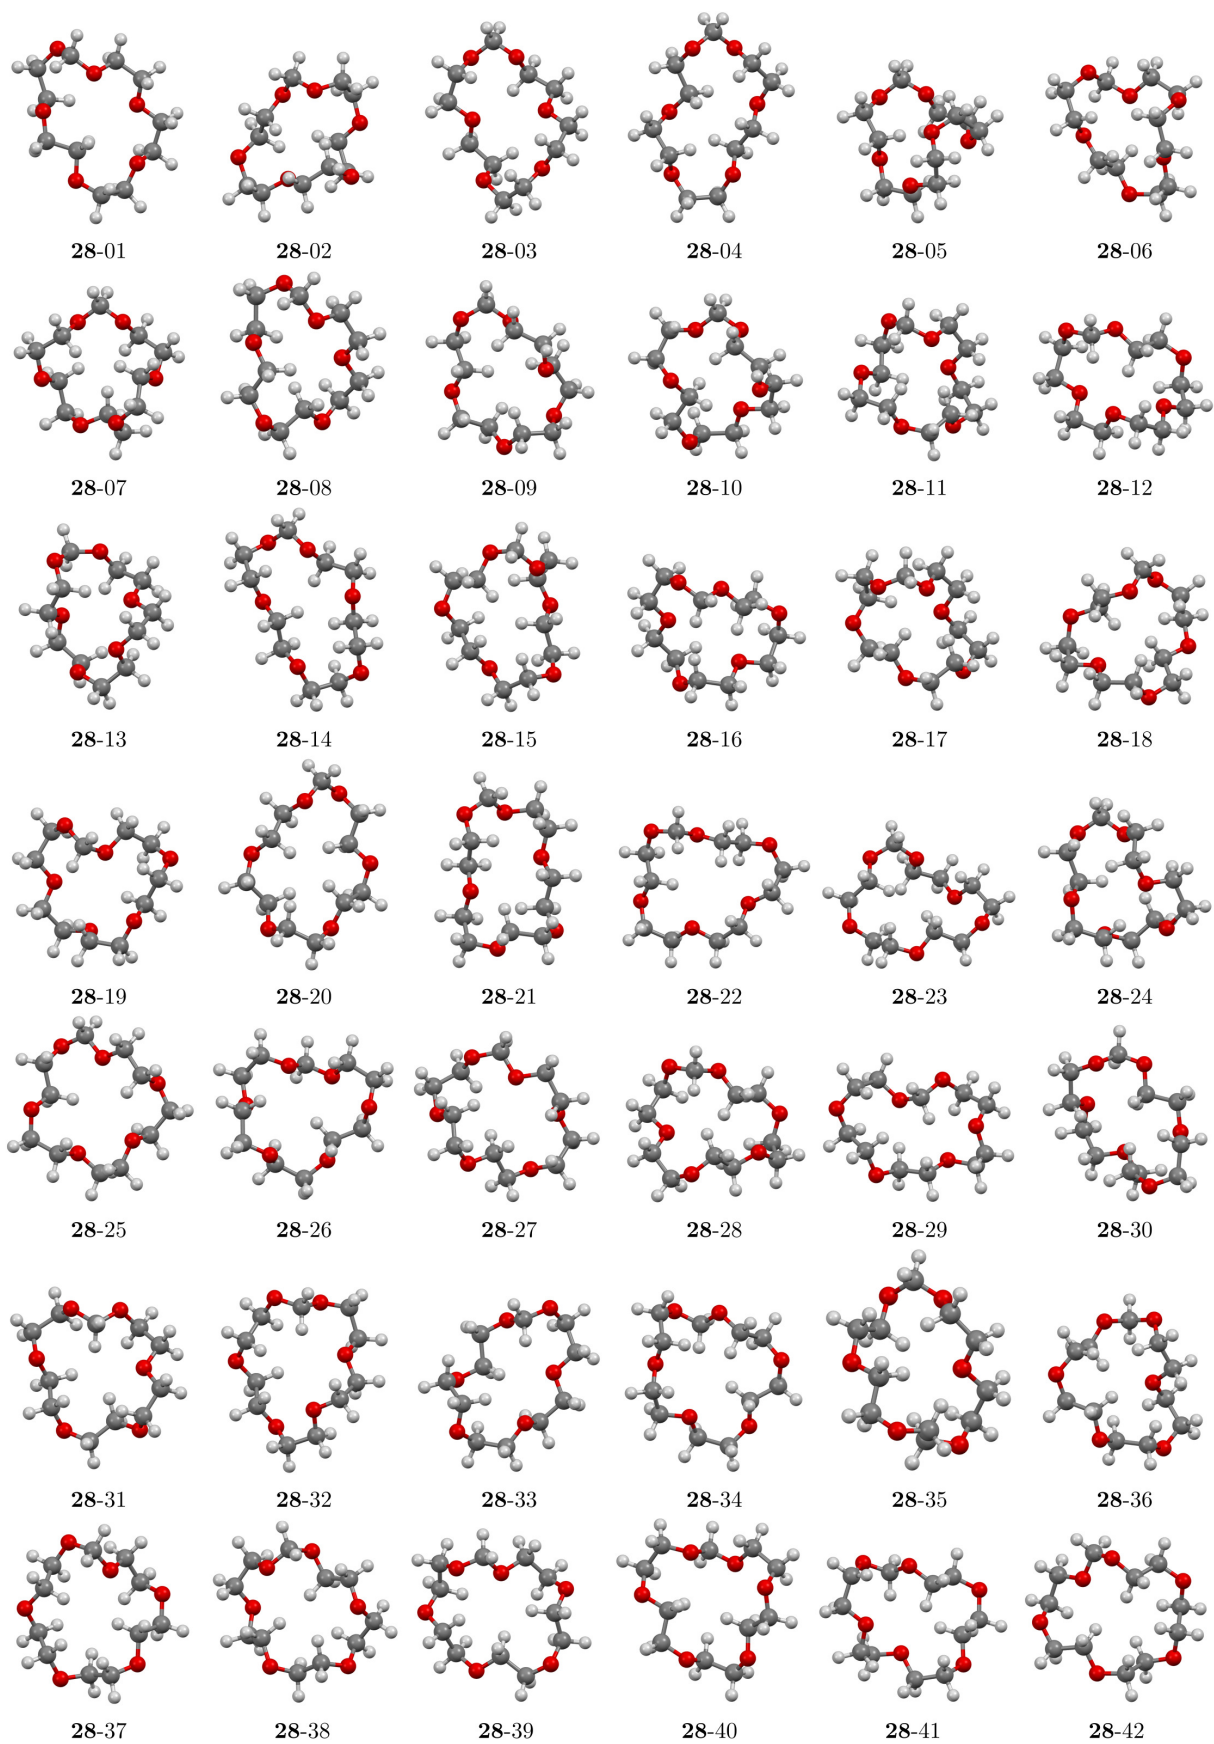

Figure S28: Crown **28** conformers optimized at M06-2X/6-31+G(d,p) level.

Table S28: Relative energy  $E$  (in kcal/mol) of crown **28** conformers computed at the M06-2X/6-31+G(d,p) level.

| Conformer    | $E$ |
|--------------|-----|--------------|-----|--------------|-----|--------------|-----|--------------|-----|--------------|-----|
| <b>28-01</b> | 0.0 | <b>28-02</b> | 0.0 | <b>28-03</b> | 0.1 | <b>28-04</b> | 0.3 | <b>28-05</b> | 0.5 | <b>28-06</b> | 0.8 |
| <b>28-07</b> | 1.1 | <b>28-08</b> | 1.5 | <b>28-09</b> | 1.8 | <b>28-10</b> | 2.2 | <b>28-11</b> | 2.2 | <b>28-12</b> | 2.4 |
| <b>28-13</b> | 2.6 | <b>28-14</b> | 2.7 | <b>28-15</b> | 2.7 | <b>28-16</b> | 2.8 | <b>28-17</b> | 2.8 | <b>28-18</b> | 2.9 |
| <b>28-19</b> | 3.1 | <b>28-20</b> | 3.2 | <b>28-21</b> | 3.4 | <b>28-22</b> | 3.9 | <b>28-23</b> | 4.0 | <b>28-24</b> | 4.0 |
| <b>28-25</b> | 4.1 | <b>28-26</b> | 4.2 | <b>28-27</b> | 4.3 | <b>28-28</b> | 4.7 | <b>28-29</b> | 4.9 | <b>28-30</b> | 5.1 |
| <b>28-31</b> | 5.1 | <b>28-32</b> | 5.4 | <b>28-33</b> | 5.5 | <b>28-34</b> | 5.5 | <b>28-35</b> | 6.0 | <b>28-36</b> | 6.5 |
| <b>28-37</b> | 6.9 | <b>28-38</b> | 6.9 | <b>28-39</b> | 7.4 | <b>28-40</b> | 7.7 | <b>28-41</b> | 7.9 | <b>28-42</b> | 9.3 |

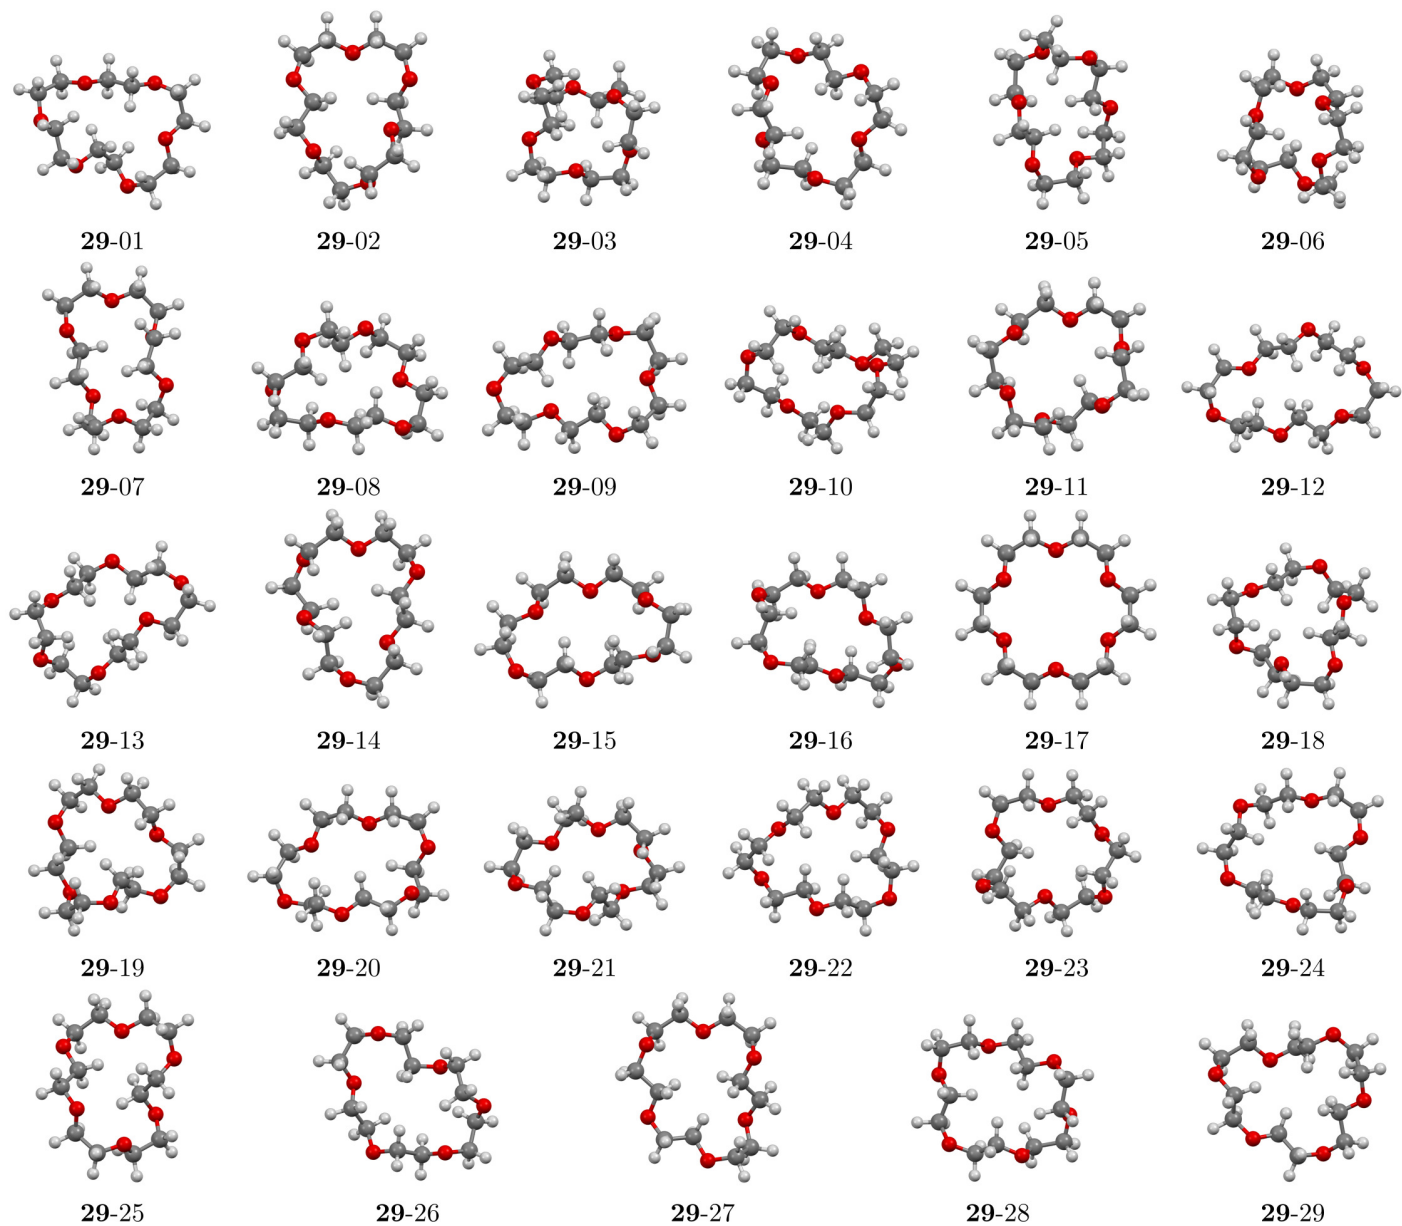

Figure S29: Crown **29** conformers optimized at M06-2X/6-31+G(d,p) level.

Table S29: Relative energy  $E$  (in kcal/mol) of crown **29** conformers computed at the M06-2X/6-31+G(d,p) level.

| Conformer | $E$ |
|-----------|-----|-----------|-----|-----------|-----|-----------|-----|-----------|-----|-----------|-----|
| 29-01     | 0.0 | 29-02     | 0.1 | 29-03     | 0.8 | 29-04     | 0.8 | 29-05     | 1.1 | 29-06     | 1.2 |
| 29-07     | 1.5 | 29-08     | 1.7 | 29-09     | 1.7 | 29-10     | 1.9 | 29-11     | 2.2 | 29-12     | 2.3 |
| 29-13     | 2.5 | 29-14     | 2.6 | 29-15     | 2.9 | 29-16     | 3.4 | 29-17     | 3.6 | 29-18     | 3.9 |
| 29-19     | 4.1 | 29-20     | 4.3 | 29-21     | 4.5 | 29-22     | 4.5 | 29-23     | 4.6 | 29-24     | 4.8 |
| 29-25     | 5.0 | 29-26     | 5.5 | 29-27     | 5.5 | 29-28     | 6.1 | 29-29     | 7.7 |           |     |

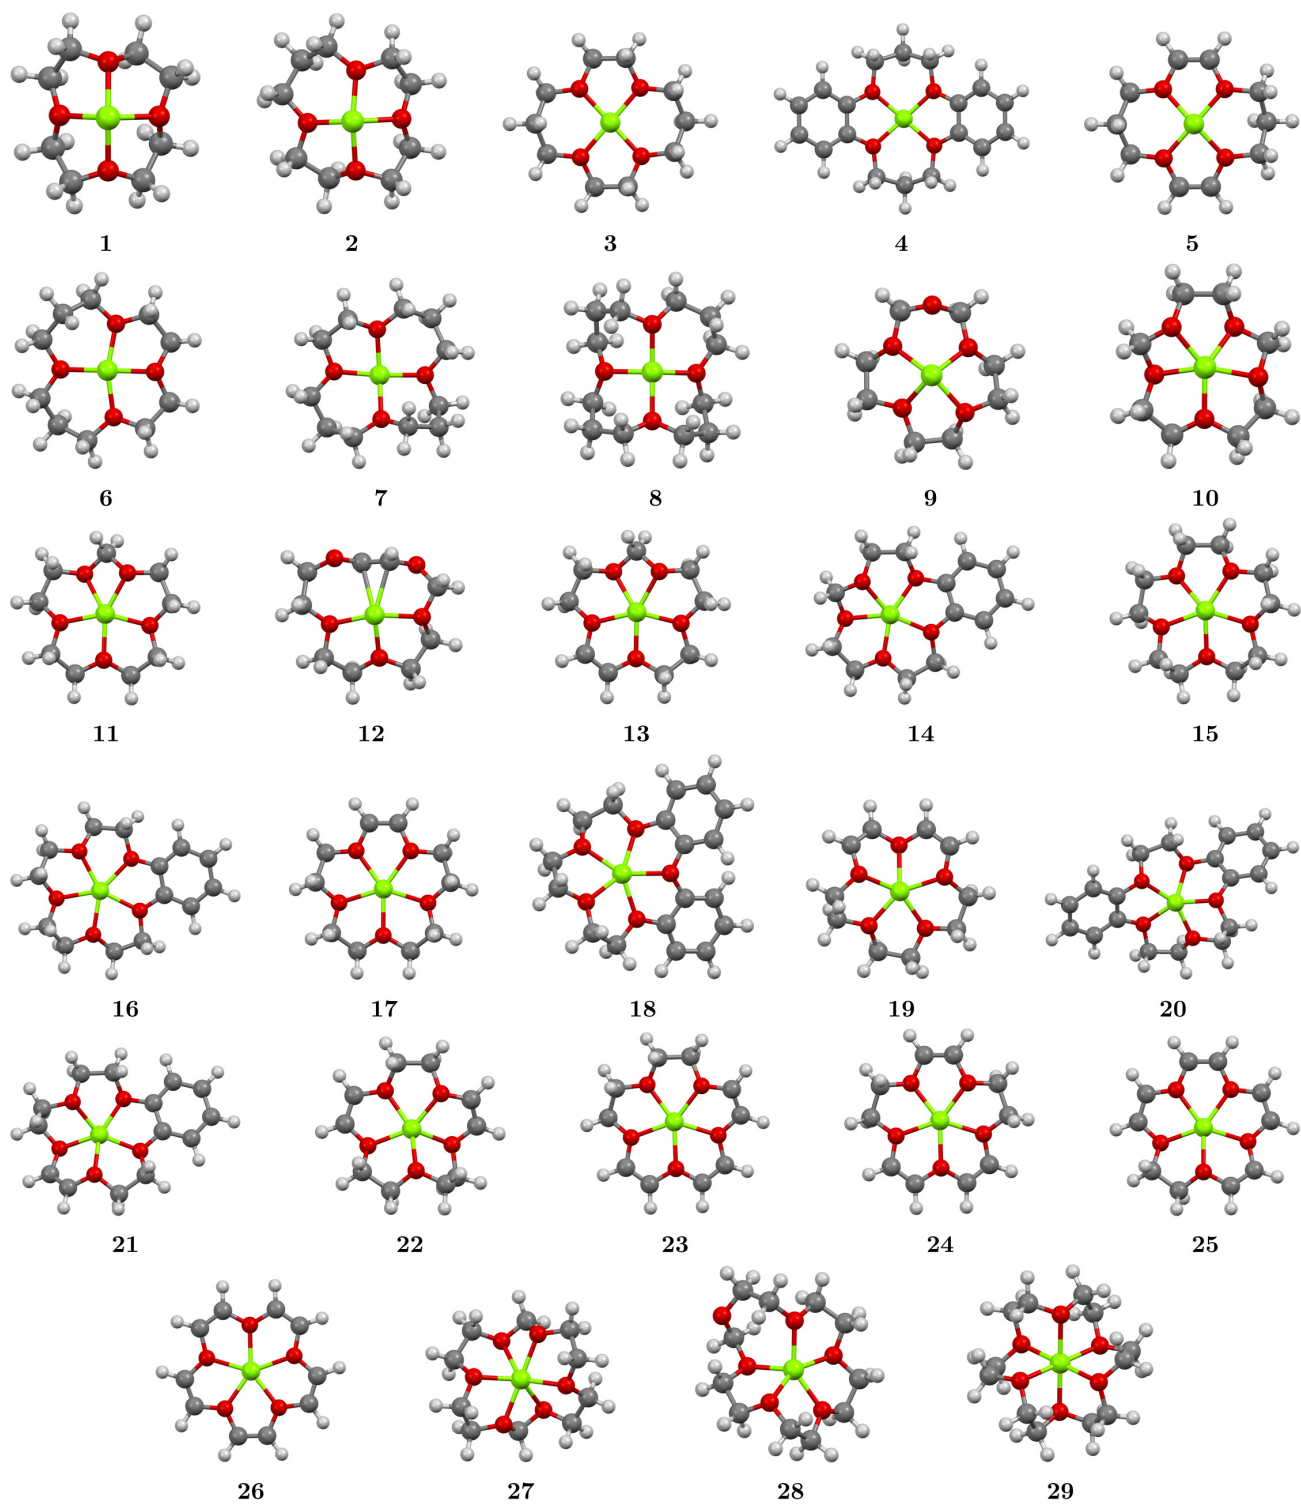

Figure S30: Structures of crown-magnesium complexes optimized at 6-311+G(d,p) level.

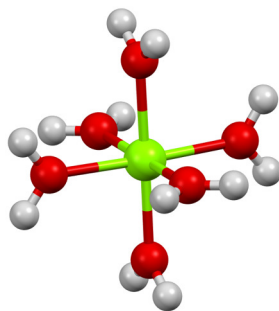

Figure S31: Structure of the magnesium ion coordinated with six water molecules optimized at 6-311+G(d,p) level.

Table S30: Changes in average Mg-O distances induced by the solvent,  $\Delta\bar{r}_r(\text{Mg-O})$ ; changes in Mg distances from the plane defined by crown's oxygen atoms,  $\Delta r_{\text{plane}}^{n_{\text{O}}}$ . All distances are presented in Å.  $\Delta E_{\text{cl}}^{\text{CMg}}$ ,  $\Delta E_{\text{xc}}^{\text{CMg}}$ , and  $\Delta E_{\text{int}}^{\text{CMg}}$  stand for the changes in classical, non-classical, and the overall crown-magnesium interaction energy caused by the presence of explicit solvent molecules. All energy components are presented in kcal/mol. Thin horizontal lines are used to emphasize that crowns **1-8**, **9-26**, and **27-29** contain 4, 5, and 6 oxygen atoms, respectively.

| C         | hydration induced changes      |                                          |                                     |                                     |                                      |
|-----------|--------------------------------|------------------------------------------|-------------------------------------|-------------------------------------|--------------------------------------|
|           | $\Delta\bar{r}_r(\text{Mg-O})$ | $\Delta r_{\text{plane}}^{n_{\text{O}}}$ | $\Delta E_{\text{cl}}^{\text{CMg}}$ | $\Delta E_{\text{xc}}^{\text{CMg}}$ | $\Delta E_{\text{int}}^{\text{CMg}}$ |
| <b>1</b>  | +0.034                         | +0.078                                   |                                     |                                     |                                      |
| <b>2</b>  | +0.007                         | -0.430                                   | 42.4                                | 8.8                                 | 51.2                                 |
| <b>3</b>  | +0.053                         | 0.000                                    | 46.1                                | 18.6                                | 64.7                                 |
| <b>4</b>  | +0.043                         | -0.191                                   | 49.4                                | 16.6                                | 66.0                                 |
| <b>5</b>  | +0.038                         | -0.187                                   | 43.7                                | 15.6                                | 59.3                                 |
| <b>6</b>  | +0.047                         | -0.013                                   | 42.7                                | 18.7                                | 61.5                                 |
| <b>7</b>  | +0.073                         | -0.243                                   | 40.7                                | 22.5                                | 63.2                                 |
| <b>8</b>  | +0.107                         | -0.171                                   | 32.6                                | 30.2                                | 62.8                                 |
| <b>9</b>  | +0.015                         | -0.017                                   |                                     |                                     |                                      |
| <b>10</b> | +0.036                         | -0.210                                   | 35.9                                | 17.8                                | 53.7                                 |
| <b>11</b> | +0.055                         | -0.057                                   | 45.0                                | 19.0                                | 64.0                                 |
| <b>12</b> | -0.018                         | -0.353                                   |                                     |                                     |                                      |
| <b>13</b> | +0.046                         | +0.003                                   | 41.2                                | 18.5                                | 59.7                                 |
| <b>14</b> | +0.046                         | -0.028                                   | 43.3                                | 18.5                                | 61.8                                 |
| <b>15</b> | +0.081                         | -0.041                                   | 49.4                                | 22.1                                | 71.5                                 |
| <b>16</b> | +0.063                         | -0.010                                   |                                     |                                     |                                      |
| <b>17</b> | +0.055                         | -0.005                                   |                                     |                                     |                                      |
| <b>18</b> | +0.073                         | -0.023                                   |                                     |                                     |                                      |
| <b>19</b> | +0.086                         | -0.066                                   |                                     |                                     |                                      |
| <b>20</b> | +0.109                         | -0.120                                   |                                     |                                     |                                      |
| <b>21</b> | +0.102                         | -0.004                                   |                                     |                                     |                                      |
| <b>22</b> | +0.099                         | -0.026                                   |                                     |                                     |                                      |
| <b>23</b> | +0.056                         | +0.008                                   |                                     |                                     |                                      |
| <b>24</b> | +0.049                         | -0.005                                   |                                     |                                     |                                      |
| <b>25</b> | +0.052                         | +0.035                                   |                                     |                                     |                                      |
| <b>26</b> | +0.047                         | +0.070                                   |                                     |                                     |                                      |
| <b>27</b> | +0.235                         | +0.110                                   |                                     |                                     |                                      |
| <b>28</b> | +0.142                         | -0.101                                   |                                     |                                     |                                      |
| <b>29</b> | +0.170                         | +0.252                                   |                                     |                                     |                                      |



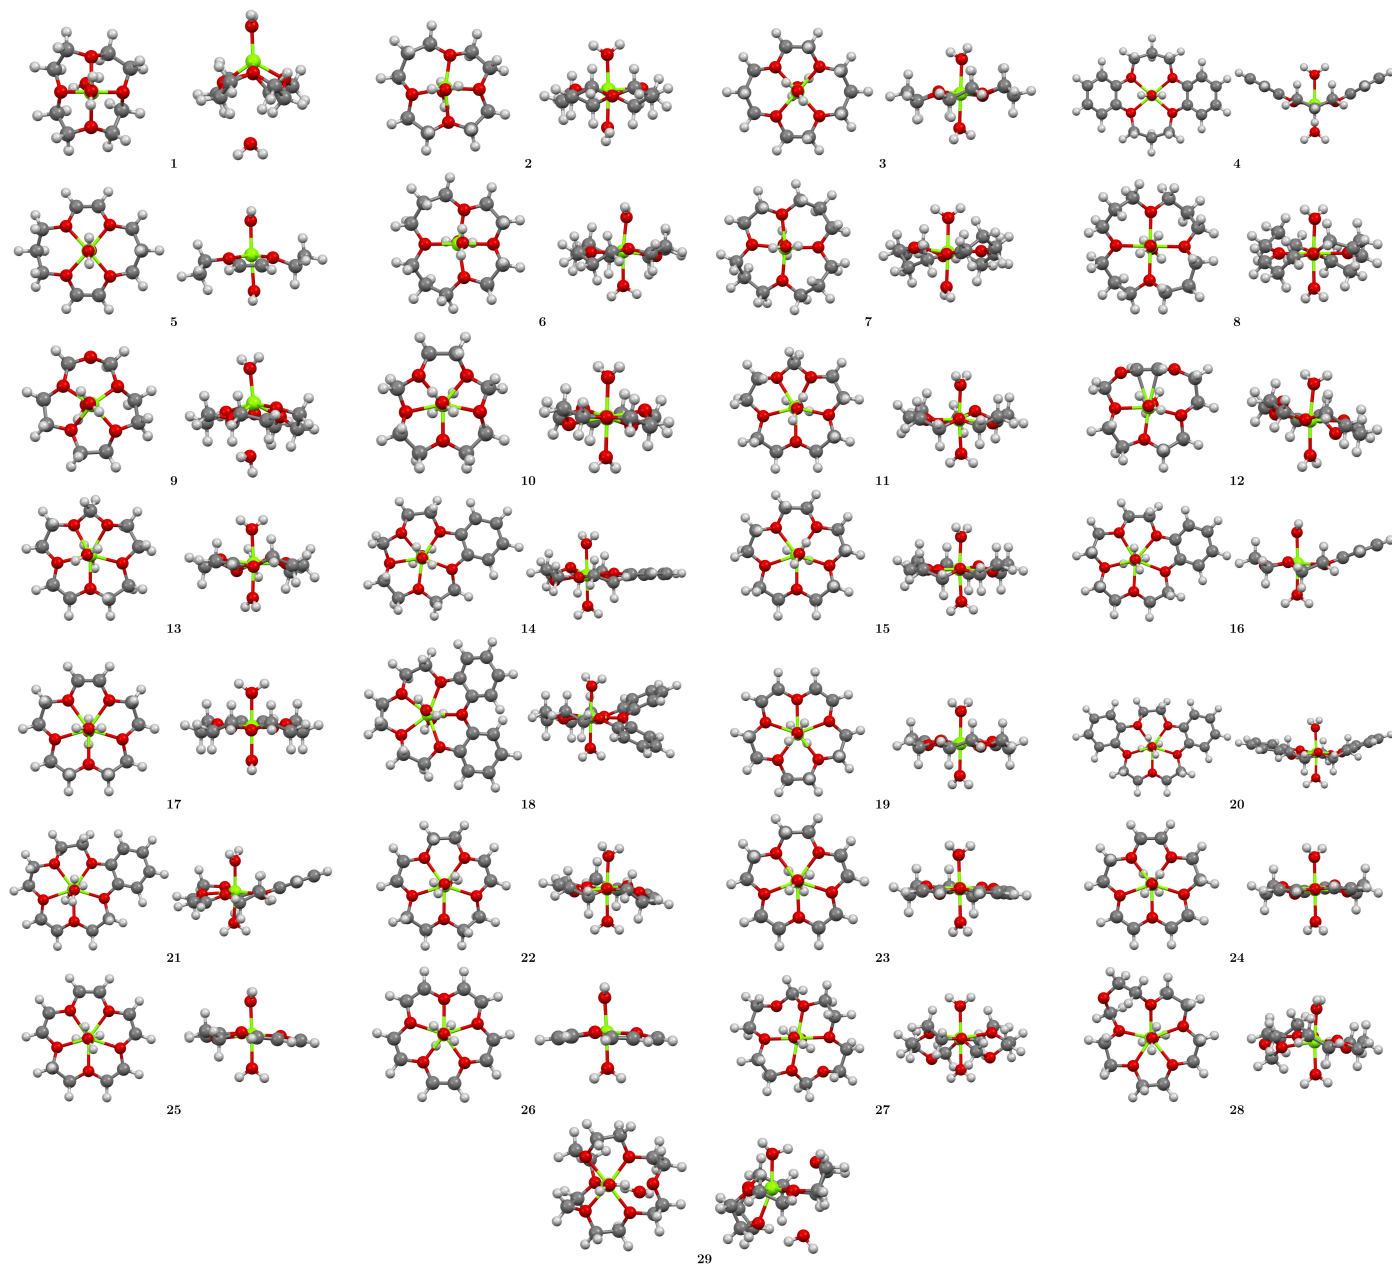

Figure S32: Structures of magnesium–crown complexes with the magnesium ion coordinated with two water molecules optimized at M06-2X/6-311+G(d,p) level.

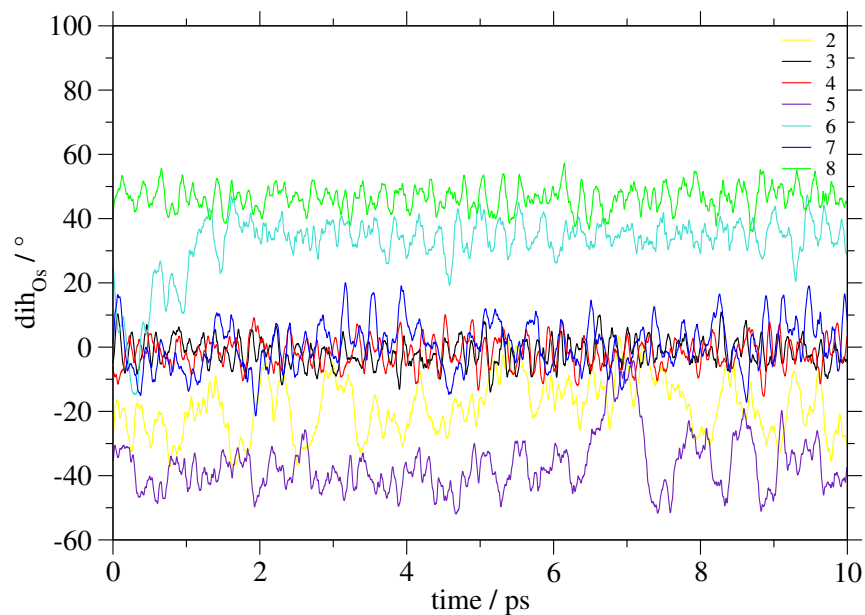

Figure S33: Time evolution of the dihedral angle  $d_{O_s}$  formed by the four oxygen atoms in complexes of  $Mg^{2+}$  with crowns **2-8**.

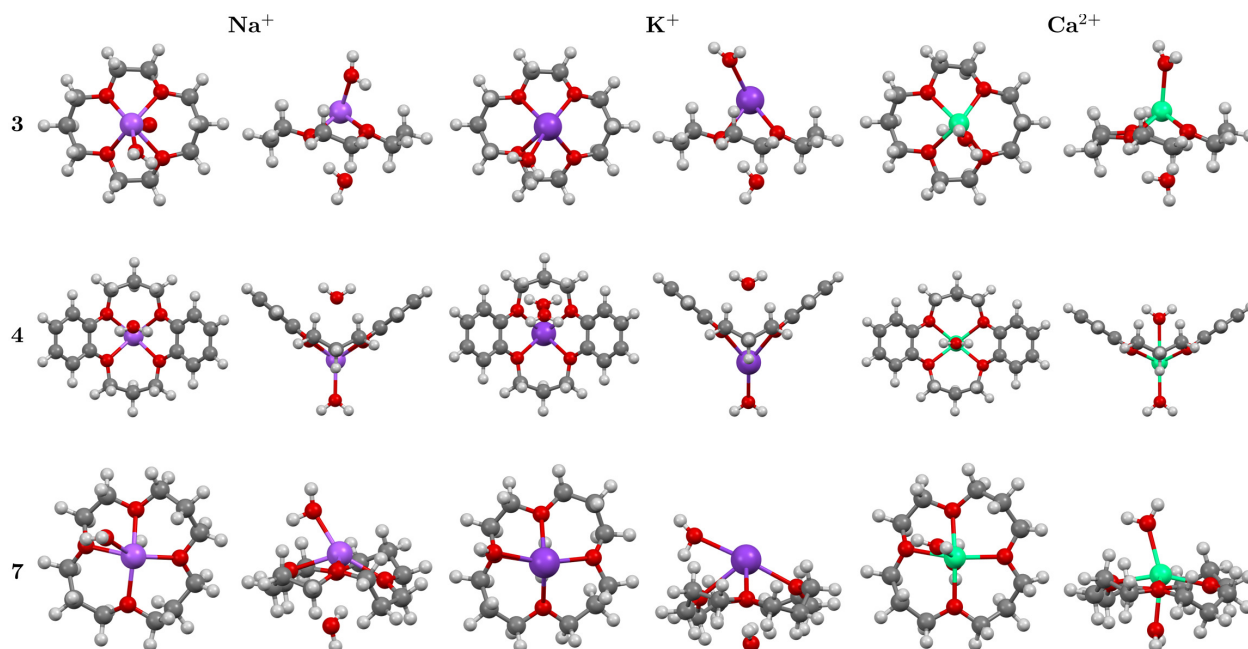

Figure S34: Structures of dihydrated complexes of  $Na^+$  (the first and the second column),  $K^+$  (the third and the fourth column), and  $Ca^{2+}$  (the fifth and the sixth column) with crowns **3, 4, and 7** optimized at M06-2X/6-311+G(d,p) level.

Table S31: Average IQA energy components (in kcal/mol) for Mg–solvent (MgS) and crown–solvent (CS) interaction: solvent deformation energy  $\bar{E}_{\text{def}}^{\text{S}}$ , solvent promotion energy  $\bar{E}_{\text{pro}}^{\text{S}}$ , as well as classical  $\bar{E}_{\text{cl}}^{\text{MgS}}/\bar{E}_{\text{cl}}^{\text{CS}}$ , non-classical  $\bar{E}_{\text{xc}}^{\text{MgS}}/\bar{E}_{\text{xc}}^{\text{CS}}$ , and overall  $\bar{E}_{\text{int}}^{\text{MgS}}/\bar{E}_{\text{int}}^{\text{CS}}$  ion–solvent/crown–solvent interaction energy, absolute value of the difference in solvents’ promotion energies  $\Delta E_{\text{pro}}^{\text{S}}$ , absolute value of the difference in classical  $\Delta E_{\text{cl}}^{\text{MgS}}/\Delta E_{\text{cl}}^{\text{CS}}$ , non-classical  $\Delta E_{\text{xc}}^{\text{MgS}}/\Delta E_{\text{xc}}^{\text{CS}}$ , and overall  $\Delta E_{\text{int}}^{\text{MgS}}/\Delta E_{\text{int}}^{\text{CS}}$  ion–solvent/crown–solvent interaction energy.

| C  | $\bar{E}_{\text{def}}^{\text{S}}$ | $\bar{E}_{\text{pro}}^{\text{S}}$ | $\bar{E}_{\text{cl}}^{\text{MgS}}/\bar{E}_{\text{cl}}^{\text{CS}}$ | $\bar{E}_{\text{xc}}^{\text{MgS}}/\bar{E}_{\text{xc}}^{\text{CS}}$ | $\bar{E}_{\text{int}}^{\text{MgS}}/\bar{E}_{\text{int}}^{\text{CS}}$ | $\Delta E_{\text{pro}}^{\text{S}}$ | $\Delta E_{\text{cl}}^{\text{MgS}}/\Delta E_{\text{cl}}^{\text{CS}}$ | $\Delta E_{\text{xc}}^{\text{MgS}}/\Delta E_{\text{xc}}^{\text{CS}}$ | $\Delta E_{\text{int}}^{\text{MgS}}/\Delta E_{\text{int}}^{\text{CS}}$ |
|----|-----------------------------------|-----------------------------------|--------------------------------------------------------------------|--------------------------------------------------------------------|----------------------------------------------------------------------|------------------------------------|----------------------------------------------------------------------|----------------------------------------------------------------------|------------------------------------------------------------------------|
| 2  | 0.1                               | 32.3                              | -53.2 / 16.4                                                       | -11.6 / -38.8                                                      | -64.8 / -22.3                                                        | 6.0                                | 5.8 / 1.1                                                            | 6.4 / 20.1                                                           | 12.1 / 21.2                                                            |
| 3  | 0.1                               | 30.3                              | -54.1 / 18.2                                                       | -12.5 / -35.1                                                      | -66.6 / -16.9                                                        | 0.0                                | 0.0 / 0.0                                                            | 0.0 / 0.0                                                            | 0.0 / 0.0                                                              |
| 4  | 0.1                               | 30.8                              | -56.8 / 18.0                                                       | -12.8 / -34.8                                                      | -69.8 / -16.8                                                        | 6.3                                | 1.3 / 0.1                                                            | 4.7 / 17.0                                                           | 6.1 / 17.1                                                             |
| 5  | 0.1                               | 31.1                              | -56.3 / 17.6                                                       | -12.8 / -34.4                                                      | -69.1 / -16.8                                                        | 9.0                                | 1.0 / 0.3                                                            | 6.0 / 26.1                                                           | 7.0 / 25.7                                                             |
| 6  | 0.1                               | 30.6                              | -55.2 / 18.8                                                       | -12.4 / -35.8                                                      | -67.6 / -17.0                                                        | 0.8                                | 0.3 / 0.6                                                            | 0.4 / 1.6                                                            | 0.1 / 1.1                                                              |
| 7  | 0.1                               | 30.5                              | -56.2 / 20.2                                                       | -12.7 / -36.0                                                      | -69.0 / -15.8                                                        | 0.2                                | 0.5 / 0.2                                                            | 0.4 / 0.3                                                            | 0.9 / 0.4                                                              |
| 8  | 0.1                               | 32.0                              | -57.0 / 20.8                                                       | -13.0 / -38.1                                                      | -70.0 / -17.4                                                        | 0.9                                | 1.3 / 0.3                                                            | 1.2 / 3.0                                                            | 2.5 / 2.7                                                              |
| 10 | 0.1                               | 32.8                              | -54.0 / 16.6                                                       | -11.7 / -38.8                                                      | -65.6 / -22.3                                                        | 0.2                                | 0.1 / 0.0                                                            | 0.0 / 0.1                                                            | 0.1 / 0.2                                                              |
| 11 | 0.2                               | 31.0                              | -55.8 / 18.5                                                       | -13.4 / -35.3                                                      | -69.2 / -16.8                                                        | 0.1                                | 0.1 / 0.4                                                            | 0.5 / 1.2                                                            | 0.6 / 0.7                                                              |
| 13 | 0.1                               | 31.2                              | -55.4 / 17.8                                                       | -13.4 / -34.5                                                      | -68.7 / -16.6                                                        | 0.5                                | 0.3 / 0.2                                                            | 0.1 / 1.4                                                            | 0.4 / 1.5                                                              |
| 14 | 0.1                               | 30.8                              | -55.0 / 17.9                                                       | -13.4 / -34.4                                                      | -68.4 / -16.4                                                        | 0.2                                | 0.7 / 0.6                                                            | 0.2 / 0.3                                                            | 0.5 / 1.0                                                              |
| 15 | 0.2                               | 29.3                              | -57.3 / 20.4                                                       | -14.6 / -31.4                                                      | -71.9 / -11.0                                                        | 0.0                                | 0.0 / 0.0                                                            | 0.0 / 0.0                                                            | 0.0 / 0.0                                                              |

Table S32: Distance of the metal ion from the center of mass defined by crown’s oxygen atoms  $r(\text{M}-\text{COM})$  (M = Mg, Na, K, Ca) in the optimized hydrated complexes  $[\text{CM}(\text{H}_2\text{O})_2]^{n+}$  ( $n = 2$  for Mg and Ca;  $n = 1$  for Na, K); average ion–oxygen distances  $\bar{r}(\text{ion}-\text{O}_i)$  ( $i = 1, 2, 3, 4$ ) and the overall average ion–oxygen distance  $\bar{r}(\text{ion}-\text{O})$ ; the number of solvent molecules  $n_{\text{S}}$  that coordinate the cation in the DFT-MD simulations. All distances are presented in Å.

| crown | ion | $r(\text{M}-\text{COM})$ | $\bar{r}(\text{ion}-\text{O}_1)$ | $\bar{r}(\text{ion}-\text{O}_2)$ | $\bar{r}(\text{ion}-\text{O}_3)$ | $\bar{r}(\text{ion}-\text{O}_4)$ | $\bar{r}(\text{ion}-\text{O})$ | $n_{\text{S}}$ |
|-------|-----|--------------------------|----------------------------------|----------------------------------|----------------------------------|----------------------------------|--------------------------------|----------------|
| 2     | Mg  | 0.238                    | 2.906                            | 3.108                            | 4.470                            | 4.264                            | 3.687                          | 3.0            |
| 3     | Mg  | 0.002                    | 2.045                            | 2.050                            | 2.061                            | 2.052                            | 2.052                          | 2.0            |
| 4     | Mg  | 0.158                    | 2.071                            | 2.072                            | 2.073                            | 2.069                            | 2.071                          | 2.0            |
| 5     | Mg  | 0.195                    | 2.365                            | 3.670                            | 2.172                            | 2.197                            | 2.601                          | 3.0            |
| 6     | Mg  | 0.168                    | 2.134                            | 2.182                            | 2.116                            | 2.071                            | 2.126                          | 1.7            |
| 7     | Mg  | 0.115                    | 2.126                            | 2.088                            | 2.070                            | 2.083                            | 2.092                          | 2.0            |
| 8     | Mg  | 0.032                    | 2.172                            | 2.150                            | 2.142                            | 2.123                            | 2.147                          | 1.9            |
| 3     | Na  | 1.075                    | 2.128                            | 2.098                            | 2.069                            | 2.174                            | 2.117                          | 1.2            |
| 3     | K   | 1.739                    | 2.927                            | 3.093                            | 3.271                            | 3.055                            | 3.086                          | 3.3            |
| 3     | Ca  | 1.059                    | 2.637                            | 2.615                            | 2.575                            | 2.635                            | 2.616                          | 3.9            |

Table S33: Selected geometric parameters in dihydrated complexes of  $\text{Na}^+$ ,  $\text{K}^+$ , and  $\text{Ca}^{2+}$  with crowns **3**, **4**, and **7** optimized at M06-2X/6-31+G(d,p) level: difference in the two ion-S bond lengths,  $\Delta r(\text{Mg}-\text{S})$ ; ion distances from the plane defined by crown’s oxygen atoms/crown’s and solvent’s oxygen atoms,  $r_{\text{plane}}^{\text{O}} / r_{\text{plane}}^{\text{O/S}}$ .

| crown | ion | $\Delta r(\text{Mg}-\text{S})$ | $r_{\text{plane}}^{\text{O}}$ | $r_{\text{plane}}^{\text{O/S}}$ |
|-------|-----|--------------------------------|-------------------------------|---------------------------------|
| 3     | Na  | 1.089                          | 1.062                         | 0.491                           |
| 3     | K   | 1.273                          | 1.724                         | 0.827                           |
| 3     | Ca  | 0.912                          | 1.048                         | 0.029                           |
| 4     | Na  | 1.302                          | 1.077                         | 0.032                           |
| 4     | K   | 1.774                          | 1.742                         | 0.287                           |
| 4     | Ca  | 0.283                          | 0.815                         | 0.000                           |
| 7     | Na  | 0.902                          | 0.842                         | 0.576                           |
| 7     | K   | 1.150                          | 1.609                         | 1.400                           |
| 7     | Ca  | 0.100                          | 0.526                         | 0.109                           |
